# Supplementary material for: Iridium(iii)-catalyzed two-fold C–H alkylation of BINOLs with allyl alcohols
Source: Royal Society of Chemistry journal article supplement (doi:10.1039/d1qo01486b), 2021-12-07
Supplement: d1qo01486b1.pdf [file d1qo01486b1.pdf]

## Supporting Information

### Iridium(III)-Catalyzed Two-Fold C-H Alkylation of BINOLs with Allyl Alcohols

Hao Liu, Wei Chi, Meng-Ling Lin and Lin Dong\*

*\*Key Laboratory of Drug-Targeting and Drug Delivery System of the Education Ministry, Sichuan Research Center for Drug Precision Industrial Technology, West China School of Pharmacy, Sichuan University, Chengdu 610041, China*  
[dongl@scu.edu.cn](mailto:dongl@scu.edu.cn)

#### Table of Contents

1. General Information
2. General Procedure for Synthesis of BINOL Units
3. Optimization of the Reaction Conditions
4. Screening of Directing Group
5. General Procedure for the Model Reaction
6. The Scope of Alkenes
7. Synthetic Transformations of Product 3aa
8. Mechanistic Studies
9. The Large-Scale Experiments
10. The HPLC Data of Compound 3af and 4af
11. Exploration of Methyl Acrylate and But-3-en-2-ol as the Coupling Partners
12. Characterization Data and NMR Spectra
13. HPLC Data

## 1. General Information

NMR data were obtained for  $^1\text{H}$  at 400 MHz or 600 MHz, and for  $^{13}\text{C}$  at 100 MHz or 151 MHz. Chemical shifts were reported in ppm from tetramethylsilane with the solvent resonance as the internal standard in  $\text{CDCl}_3$  solution. NMR data are reported as follows: chemical shifts, multiplicity (s: singlet, d: doublet, dd: doublet of doublets, t: triplet, q: quartet, sep: septet, m: multiplet, br: broad signal), coupling constant (Hz), and integration. ESI HRMS was recorded on a Waters SYNAPT G2 and Water XEVO G2 Q-ToF. Infrared (IR) spectra were recorded by FTIR spectrometer and reported in terms of wave number ( $\text{cm}^{-1}$ ). UV detection was monitored at 254 nm. TLC was performed on glass-backed silica plates. Column chromatography was performed on silica gel (200-300 mesh), eluting with ethyl acetate and petroleum ether. Enantiomeric excesses were determined on a Thermo Fisher Chiral HPLC or Agilent Chiral HPLC using AD-H column.

Unless otherwise noted, all starting materials were purchased from commercial sources and used without any further purification. Anhydrous THF should be obtained by distillation before use. But-3-en-2-ol **2a** was commercially available, and (R)-BINOL compounds were prepared according to the literature procedures<sup>1</sup>

## 2. General Procedure for Synthesis of BINOL Units

### Procedure A:

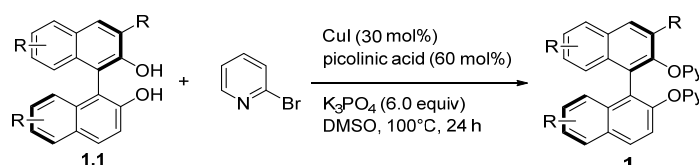

A 100 mL oven-dried round bottomed flask was charged with a magnetic stirring bar,  $\text{CuI}$  (285 mg, 1.5 mmol, 30 mol%), picolinic acid (369 mg, 3.0 mmol, 60 mol%), (R)-BINOL (5 mmol), and  $\text{K}_3\text{PO}_4$  (6360 mg, 30 mmol). The tube was then evacuated and back-filled with Ar. The procedure of evacuation/backfill was sequentially repeated two additional times. It was then added with 2-bromopyridine (24 mmol) and dimethylsulfoxide (25 mL) by syringe under an Ar atmosphere. The tube was placed in a pre-heated oil bath at  $100^\circ\text{C}$  and the reaction mixture was stirred for 24 h. The reaction mixture was cooled to room temperature and quenched with water (20 mL). Ethyl acetate (30 mL) was added and the organic layer was separated and the aqueous layer was extracted twice more with ethyl acetate. Combined organic layer was washed with water and dried over  $\text{Na}_2\text{SO}_4$ . After removal of the solvent under reduced pressure, the residue was purified via silica gel column using ethyl acetate and petroleum ether (1: 12). The product **1a** were obtained with 92 % yield (2.0 g, 4.6 mmol).

**1b-1p** were also prepared according to the procedure A. The corresponding precursor compounds **1.1b-1.1p** were prepared according to the literature procedures<sup>1</sup>.

### Procedure B:

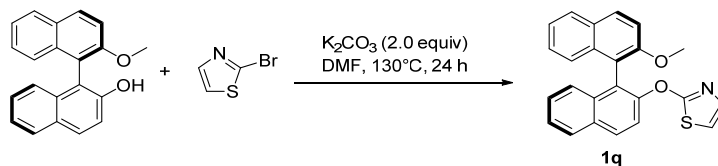

A 100 mL oven-dried round bottomed flask was charged with a magnetic stirring bar, (R)-BINOL (1 mmol),  $\text{K}_2\text{CO}_3$  (276 mg, 2 mmol) and DMF (2 mL). It was then added with 2-bromothiazole (328 mg, 2 mmol) dropwise. The tube was placed in a pre-heated oil bath at  $130^\circ\text{C}$  and the reaction mixture was

stirred for 24 h. The reaction mixture was cooled to room temperature and quenched with water. Ethyl acetate was added and the organic layer was separated and the aqueous layer was extracted twice more with ethyl acetate. Combined organic layer was washed with water and dried over Na<sub>2</sub>SO<sub>4</sub>. After removal of the solvent under reduced pressure, the residue was purified via silica gel column using ethyl acetate and petroleum ether (1: 10). The product **1q** were obtained with 88 % yield (337 mg, 0.9 mmol).

#### References:

[1] Liu, H.; Lin, M. L.; Chen, Y. J.; Huang, Y. H.; Dong, L. Rh(III)-catalyzed one-pot three-component cyclization reaction: rapid selective synthesis of monohydroxy polycyclic BINOL derivatives. *Org. Chem. Front.* **2021**, *8*, 4967–4973.

## 2. Optimization of the Reaction Conditions

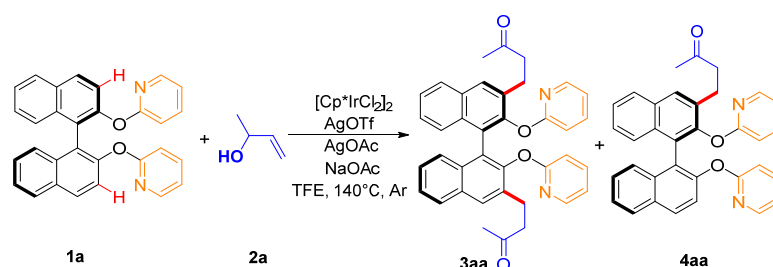

**Table S1. The effect of the amount of additives on the reaction.<sup>a</sup>**

| entry | additives (equiv)       | <b>3aa</b> yield / % <sup>b</sup> | <b>4aa</b> yield / % <sup>b</sup> |
|-------|-------------------------|-----------------------------------|-----------------------------------|
| 1     | AgOTf (0.3)+NaOAc (1)   | 88                                | trace                             |
| 2     | AgOTf (0.1)+NaOAc (1)   | 44                                | 15                                |
| 3     | AgOTf (0.2)+NaOAc (0.5) | 82                                | trace                             |
| 4     | AgOTf (0.2)+NaOAc (1.5) | 64                                | 24                                |

<sup>a</sup> Reaction conditions unless otherwise specified: 0.05 mmol of **1a**, 5 equiv of **2a**, 5 mol % of [Cp\*IrCl<sub>2</sub>]<sub>2</sub>, 2 equiv of AgOAc, 0.5 mL of TFE, 140 °C, 24 h, Ar atmosphere. <sup>b</sup> Isolated yield.

**Table S2. The effect of the amount of AgOAc on the reaction.<sup>a</sup>**

| entry | oxidant (equiv) | <b>3aa</b> yield / % <sup>b</sup> | <b>4aa</b> yield / % <sup>b</sup> |
|-------|-----------------|-----------------------------------|-----------------------------------|
| 1     | AgOAc (2)       | 89                                | trace                             |
| 2     | AgOAc (2.2)     | 77                                | 11                                |
| 3     | AgOAc (1.8)     | 74                                | 12                                |

<sup>a</sup> Reaction conditions unless otherwise specified: 0.05 mmol of **1a**, 5 equiv of **2a**, 5 mol % of [Cp\*IrCl<sub>2</sub>]<sub>2</sub>, 0.2 equiv AgOTf, 1 equiv of NaOAc, 0.5 mL of TFE, 140 °C, 24 h, air atmosphere. <sup>b</sup> Isolated yield.

## 4. Screening of Directing Group

**Table S3. Screening of Directing Group<sup>a</sup>**

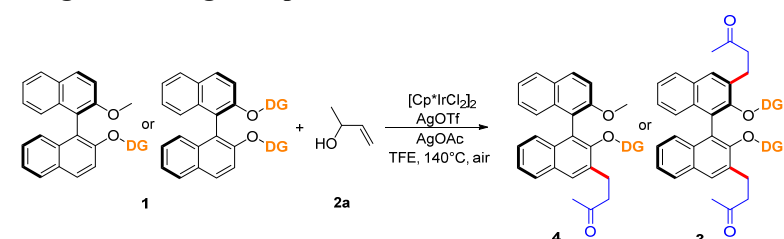

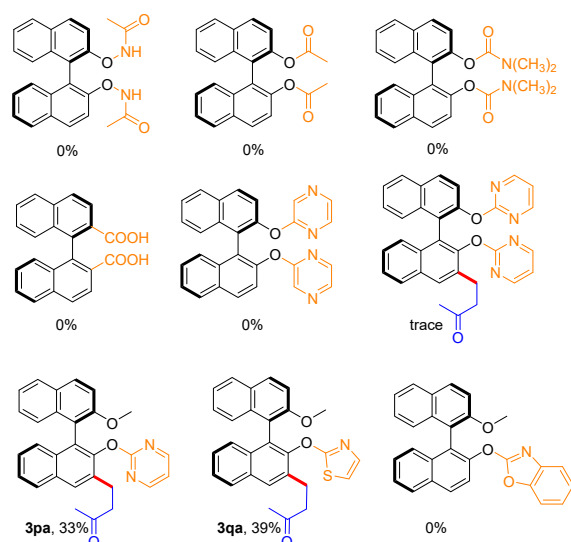

<sup>a</sup> Reaction conditions unless specified otherwise: 0.1 mmol of **1**, 6 equiv of **2a**, 5 mol % of [Cp\*IrCl<sub>2</sub>]<sub>2</sub>, 2 equiv of AgOAc, 0.2 equiv of AgOTf, 1 equiv of NaOAc, 1 mL of TFE, 140 °C, 24 h, air atmosphere. Isolated yield.

Encouraged by this attractive result, further investigation on the feasibility of different directing group was commenced (Table S3). BINOLs with oxyacetamide, acyloxy, dimethylcarbamate, even elaborate carboxyl group under the indicated conditions, no desired product was observed. Nevertheless, switching to the heteroatom substituted BINOL compounds, **3pa** and **3qa** were obtained in slightly low yield respectively. Thus, compared with other directing groups, the 2-pyridyloxy had exhibited a powerful potential in two-fold C–H alkylation of BINOLs.

## 5. General Procedure for the Model Reaction

To a flame dried screw-cap tube equipped with magnetic stir bar were introduced (R)-(+)-2,2'-bis(pyridin-2-yloxy)-1,1'-binaphthalene **1a** (22.0 mg, 0.05 mmol), and but-3-en-2-ol **2a** (26.0 μL, 6.0 equiv), [Cp\*IrCl<sub>2</sub>]<sub>2</sub> (2.0 mg, 5 mol %), AgOAc (16.8 mg, 2.0 equiv), AgOTf (2.6 mg, 0.2 equiv), NaOAc (4.1 mg, 1.0 equiv) and TFE (0.5 mL). The reaction mixture was stirred in preheated oil bath at 140 °C under air atmosphere for 24 h. After completion, the reaction mixture was purified by flash chromatography eluting with ethyl acetate and petroleum ether (1:4) to give the product **3aa** as a colorless oil (27.0 mg, 93%).

## 6. The Scope of Alkenes <sup>a</sup>

The but-3-en-2-ol **2a** was replaced by other substituents as below, but all gave inferior results.

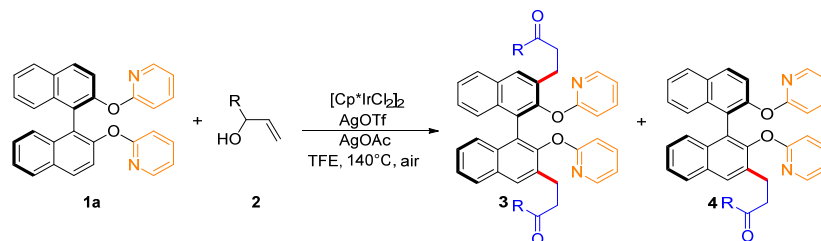

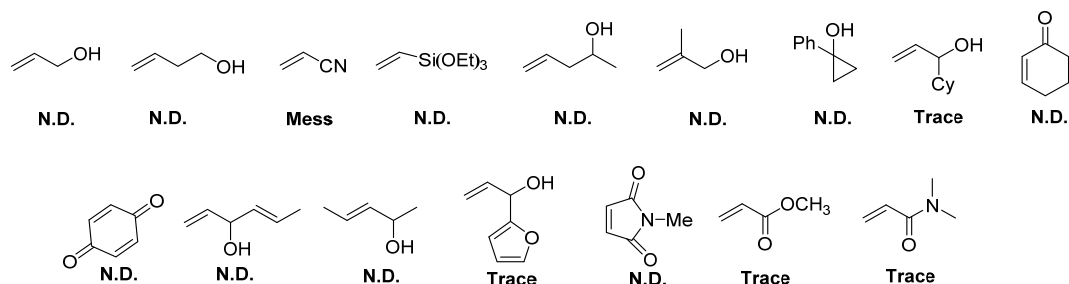

Table S4: <sup>a</sup> Reaction conditions unless otherwise specified: 0.1 mmol of **1**, 6 equiv of **2a**, 5 mol % of [Cp\*IrCl<sub>2</sub>]<sub>2</sub>, 2 equiv of AgOAc, 0.2 equiv of AgOTf, 1 equiv of NaOAc, 1 mL of TFE, 140 °C, 24 h, air atmosphere. Isolated yield.

## 7. Synthetic Transformations of Product 3aa

Procedure for synthesis of **5**:

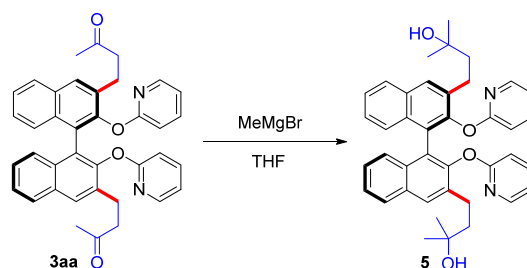

To a solution of compound **3aa** (29 mg, 0.05 mmol) in THF (1 mL) was added 3.0 M THF solution of MeMgBr (0.05 mL, 0.15 mmol) at 0 °C under nitrogen. After stirring at 25 °C temperature for 60 min, the mixture was quenched with saturated aqueous solution of NH<sub>4</sub>Cl, and extracted with EtOAc. The collected organic layers were dried with anhydrous Na<sub>2</sub>SO<sub>4</sub> and the solvents were evaporated under reduced pressure. The residue was purified by flash column chromatography using ethyl acetate/petroleum ether (1:2) as an eluent to obtain product **5** as a yellow oil (25.1 mg, 82%).

Procedure for synthesis of **6**:

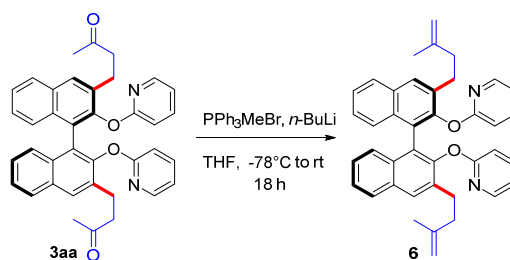

To an oven dried round bottom flask equipped with a stir bar under a N<sub>2</sub> atmosphere was added PPh<sub>3</sub>MeBr (3.50 eq.). The flask was evacuated and back filled with N<sub>2</sub> and dry THF (0.1 M) was added. The resultant mixture was cooled to -78 °C to which a solution of *n*-BuLi in hexanes (1.6M, 3.50 eq.) was added. The solution was allowed to warm to rt and stirred for 30 mins before ketone substrate was added (0.05 mmol). The reaction was allowed to stir at rt for 18 h before being diluted with ethyl acetate and quenched with H<sub>2</sub>O. The collected organic layers were dried with anhydrous Na<sub>2</sub>SO<sub>4</sub> and the solvents were evaporated under reduced pressure. The residue was purified by flash column chromatography using ethyl acetate/petroleum ether (1:10) as an eluent to obtain product **6** as a colorless oil (23.3 mg, 81%).

Procedure for synthesis of **7**:

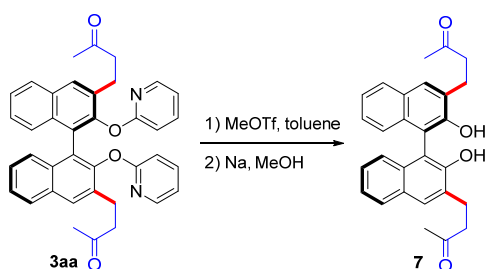

To a solution of **3aa** (29 mg, 0.05 mmol) in PhMe (1 mL) under N<sub>2</sub> was added MeOTf (50  $\mu$ L, 0.45 mmol). The reaction mixture was stirred under N<sub>2</sub> at 100  $^{\circ}$ C for 2 h. The reaction mixture was allowed to cool to ambient temperature. Evaporation of the solvent *in vacuo* yielded a yellow solid. The solid was dissolved in dry methanol (1.0 mL) and was added under N<sub>2</sub> to a solution of Na (69 mg, 3 mmol) in dry methanol (1 mL). The reaction mixture was heated at 80  $^{\circ}$ C for 15 min. The reaction mixture was allowed to cool to ambient temperature and the solvent was evaporated *in vacuo*. H<sub>2</sub>O was added, and the resulting mixture was extracted with EtOAc. The collected organic layers were dried with anhydrous Na<sub>2</sub>SO<sub>4</sub> and the solvents were evaporated under reduced pressure. The residue was purified by flash column chromatography using ethyl acetate/petroleum ether (1:8) as an eluent to obtain product **7** as a colorless oil (15.5 mg, 73%).

## 8. Mechanistic Studies

### (1) Deuterium Exchange Experiments of **1a**

To a test tube equipped with magnetic stir bar were added **1a** (22.0 mg, 0.05 mmol, 1.0 equiv), [Cp\*IrCl<sub>2</sub>]<sub>2</sub> (5 mol %), AgOAc (2.0 equiv), AgOTf (0.2 equiv), NaOAc (1.0 equiv) and D<sub>2</sub>O (0.05 mL) were stirred in TFE (0.5 mL) under air atmosphere at 140  $^{\circ}$ C in preheated oil bath for 3 h. The solution was concentrated and the residue was separated on a flash column with PE/EA (5:1) as the eluent.

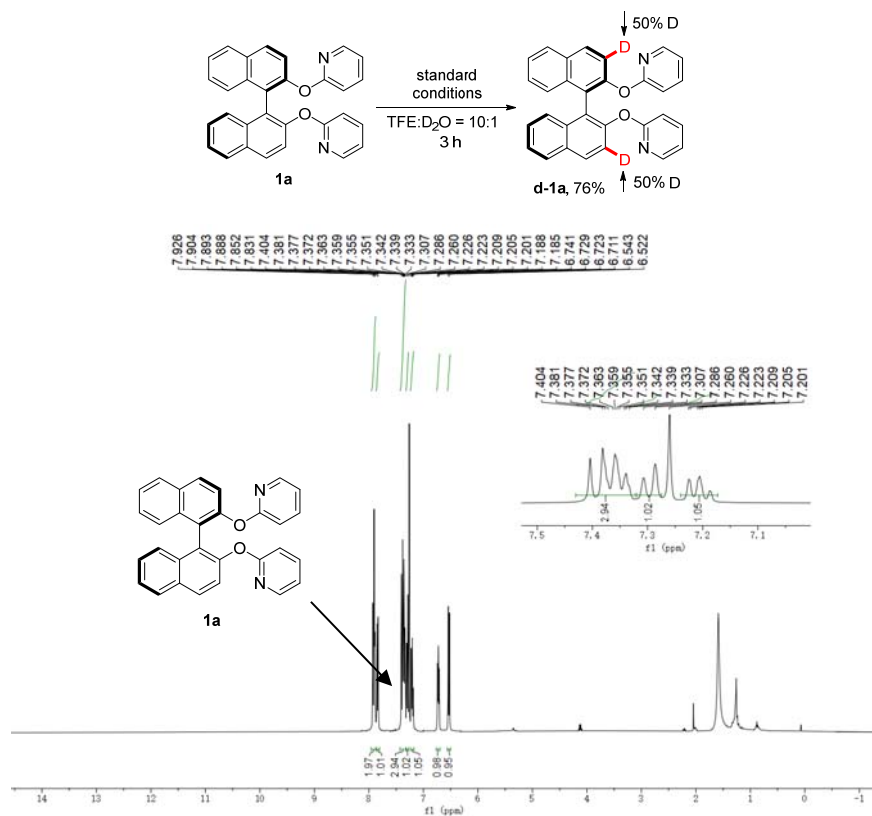

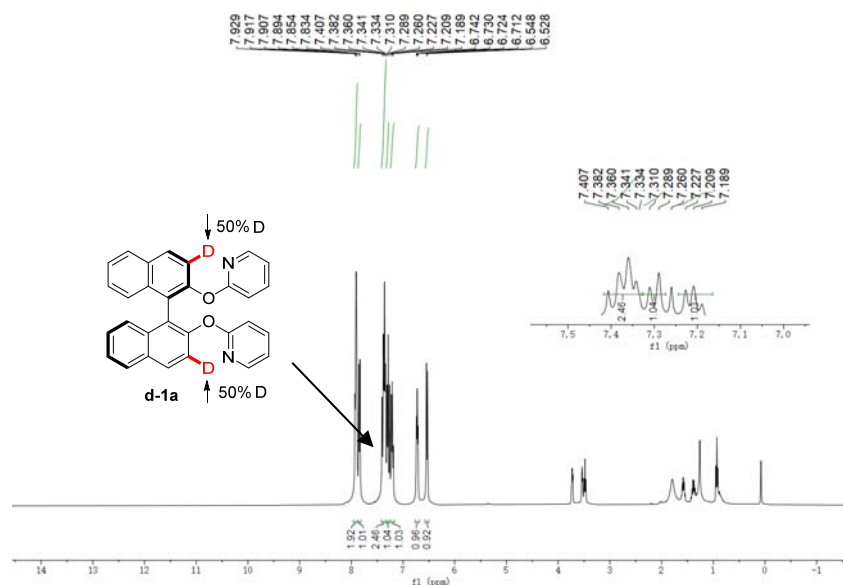

## (2) Deuterium Exchange Experiments of **1a** and **2a**

To a test tube equipped with magnetic stir bar were added **1a** (22.0 mg, 0.05 mmol, 1.0 equiv), but-3-en-2-ol **2a** (26.0  $\mu$ L, 6.0 equiv), [Cp\*IrCl<sub>2</sub>]<sub>2</sub> (5 mol %), AgOAc (2.0 equiv), AgOTf (0.2 equiv), NaOAc (1.0 equiv) and D<sub>2</sub>O (0.05 mL) were stirred in TFE (0.5 mL) under air atmosphere at 140 °C in preheated oil bath for 10 h. The solution was concentrated and the residue was separated on a flash column with PE/EA (3:1) as the eluent.

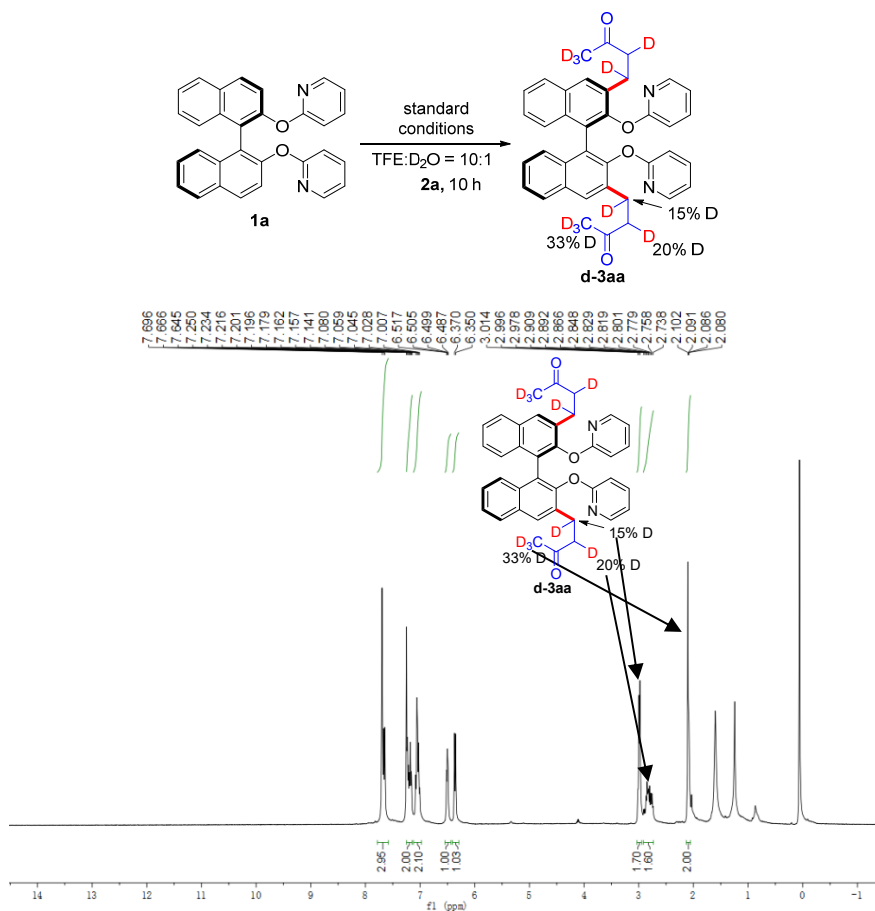

### (3) Procedure for Competition Experiments

Representative procedure for competition between **1e** and **1h**: To a flame dried screwcap tube equipped with magnetic stir bar was introduced **1e** (0.05 mmol, 1.0 equiv), **1h** (0.05 mmol, 1.0 equiv), but-3-en-2-ol **2a** (52.0  $\mu$ L, 12.0 equiv), [Cp\*IrCl<sub>2</sub>]<sub>2</sub> (10 mol %), AgOAc (4.0 equiv), AgOTf (0.4 equiv), and NaOAc (2.0 equiv) were stirred in TFE (1.0 mL) under air atmosphere at 140 °C in preheated oil bath for 24 h. The solution was concentrated and the residue was separated on a flash column with PE/EA (6:1) as the eluent to give the product **3ea** (23.4 mg, 77%), **3ha** (7.4 mg, 20%) and **4ha** (17.0 mg, 51%).

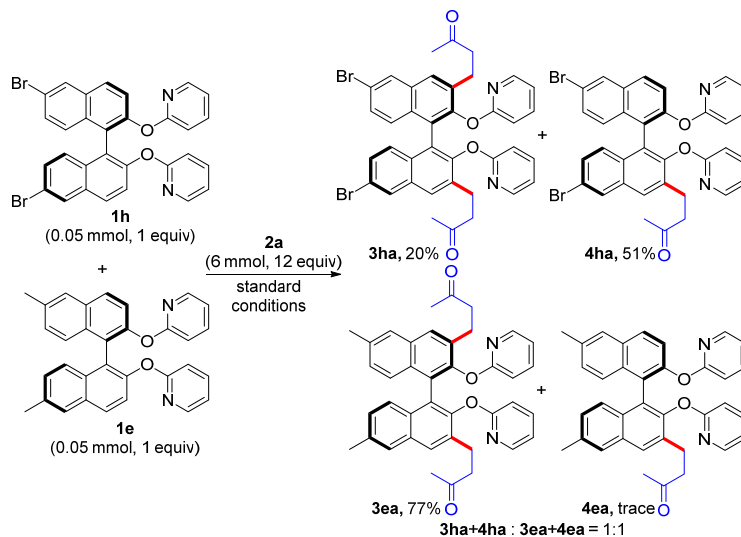

### (4) Detection of Intermediate **8** by LCMS Data

To a flame dried screw-cap tube equipped with magnetic stir bar were introduced (R)-(+)-2,2'-bis(pyridin-2-yloxy)-1,1'-binaphthalene **1a** (22.0 mg, 0.05 mmol), and but-3-en-2-ol **2a** (26.0  $\mu$ L, 6.0 equiv), [Cp\*IrCl<sub>2</sub>]<sub>2</sub> (2.0 mg, 5 mol %), AgOAc (16.8 mg, 2.0 equiv), AgOTf (2.6 mg, 0.2 equiv), NaOAc (4.1 mg, 1.0 equiv) and TFE (0.5 mL). The reaction mixture was stirred in preheated oil bath at 140 °C under argon atmosphere for 10 h. After completion, the reaction mixture was then tested by LCMS. Intermediate **8** was detected by LCMS.

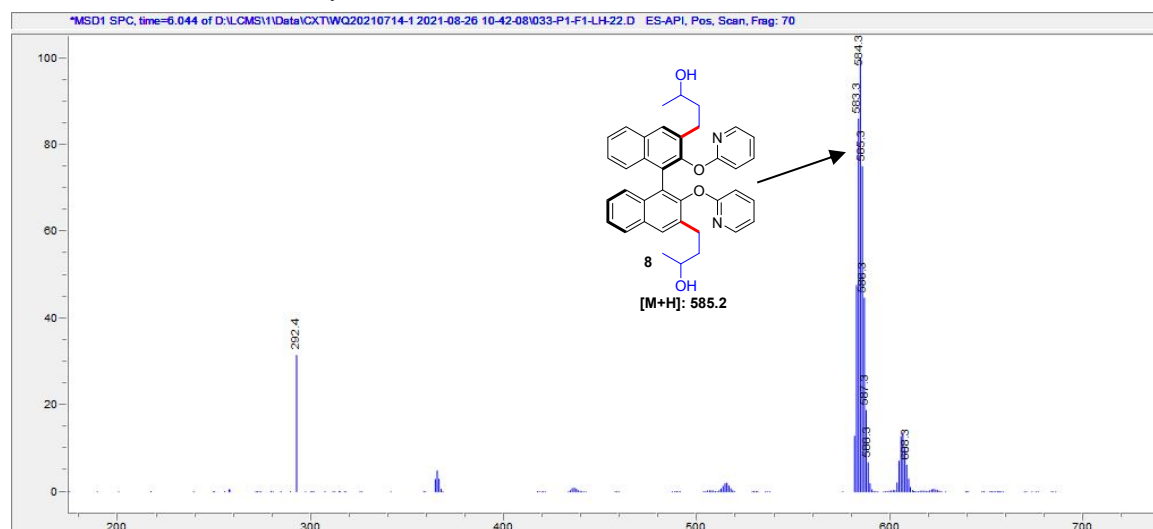

### (5) Transformation Experiment:

To a flame dried screw-cap tube equipped with magnetic stir bar were introduced **4aa** (51.0 mg, 0.1



mmol), and but-3-en-2-ol **2a** (26.0  $\mu$ L, 3.0 equiv),  $[\text{Cp}^*\text{IrCl}_2]_2$  (2.0 mg, 2.5 mol %), AgOAc (16.8 mg, 1.0 equiv), AgOTf (2.6 mg, 0.1 equiv), NaOAc (4.1 mg, 0.5 equiv) and TFE (1.0 mL). The reaction mixture was stirred in preheated oil bath at 140  $^\circ\text{C}$  under air atmosphere for 24 h. After completion, the reaction mixture was purified by flash chromatography eluting with ethyl acetate and petroleum ether (1:4) to give the product **3aa** as a colorless oil (50.2 mg, 86%) and trace **4aa**. This proved that **4aa** can be transformed into **3aa**, and the reaction is a step-by-step process.

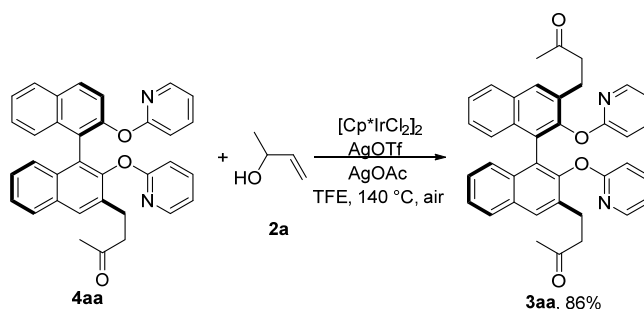

### (6) Proposed Reaction Mechanism

Based on these results and previous reports, we propose the reaction mechanism shown in S5. In the initial stage, active iridium coordinates to the nitrogen followed by C–H bond activation to generate the Ir<sup>III</sup> complex intermediate **I**. Subsequent insertion of the olefin into the C–Ir bond forms intermediate **II**, which undergoes  $\beta$ -H elimination and keto-enol tautomerism pathway to deliver the alkylation product **4aa** along with Ir<sup>I</sup> specie which is oxidized by Ag<sup>I</sup> to regenerate the Ir<sup>III</sup> active catalyst. Then, the second C–H activation process occurs to furnish intermediate **IV**. Finally, the same process occurs to produce the target product **3aa**.

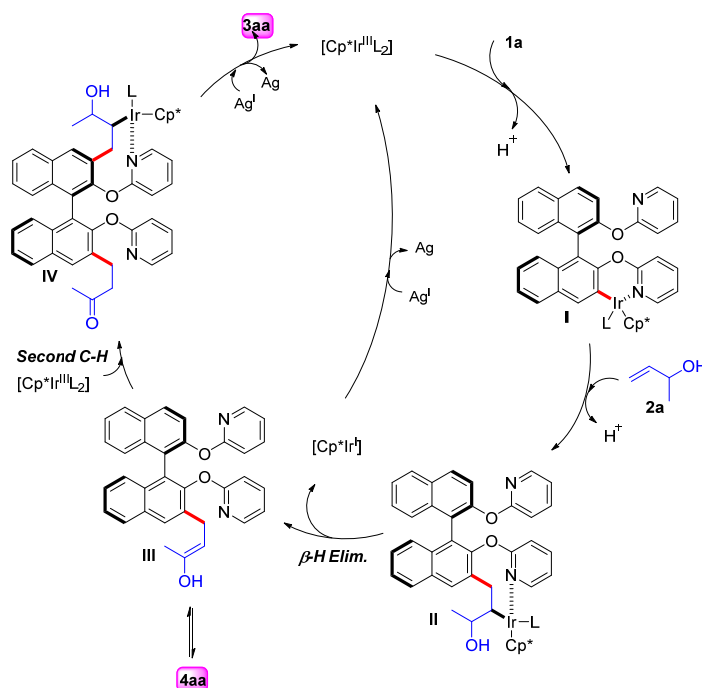

Table S5: Proposed Reaction Mechanism

## 9. The Large-Scale Experiments

**The 1a large-scale experiments:** To a flame dried screw-cap tube equipped with magnetic stir bar were introduced (R)-(+)-2,2'-bis(pyridin-2-yloxy)-1,1'-binaphthalene **1a** (440.0 mg, 1 mmol), and but-3-en-2-ol **2a** (520.0  $\mu$ L, 6.0 equiv), [Cp\*IrCl<sub>2</sub>]<sub>2</sub> (40.0 mg, 5 mol %), AgOAc (336 mg, 2.0 equiv), AgOTf (52.0 mg, 0.2 equiv), NaOAc (82.0 mg, 1.0 equiv) and TFE (10 mL). The reaction mixture was stirred in preheated oil bath at 140 °C under argon atmosphere for 40 h. After completion, the reaction mixture was purified by flash chromatography eluting with ethyl acetate and petroleum ether (1:4) to give the product **3aa** as a colorless oil (348.0 mg, 60%) and **4aa** as a colorless oil (117.3 mg, 23%).

## 10. The HPLC Data of Compound **3af** and **4af**

The product **3af** was analyzed by HPLC (AD-H, hexane/*i*-PrOH = 19/1, detector: 220 nm, flow rate: 0.8 mL/min), d.r. = 1:2:1, t<sub>1</sub>(minor) = 23.5 min, t<sub>2</sub>(minor) = 24.1 min, t<sub>3</sub>(major) = 25.8 min, t<sub>4</sub>(major) = 30.6 min, t<sub>5</sub>(major) = 35.6 min, t<sub>6</sub>(minor) = 38.4 min.

**Rac-3af**

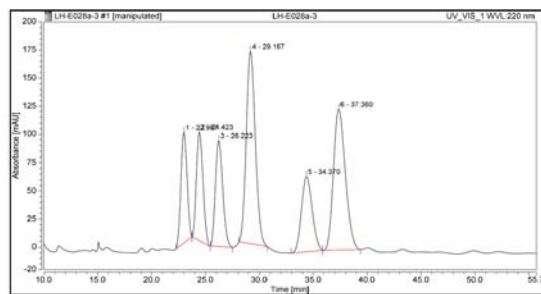

| No | Retention Time (min) | Area (mAU*min) | Height (mAU) | Relative Area (%) |
|----|----------------------|----------------|--------------|-------------------|
| 1  | 22.987               | 64.936         | 98.058       | 10.63             |
| 2  | 24.423               | 68.218         | 96.375       | 11.17             |
| 3  | 26.223               | 74.555         | 93.945       | 12.21             |
| 4  | 29.167               | 166.291        | 170.815      | 27.23             |
| 5  | 34.370               | 77.184         | 67.082       | 12.64             |
| 6  | 37.360               | 159.546        | 125.002      | 26.12             |

**Asy-3af**

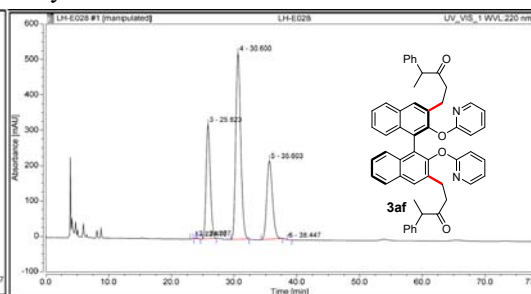

| No | Retention Time (min) | Area (mAU*min) | Height (mAU) | Relative Area (%) |
|----|----------------------|----------------|--------------|-------------------|
| 1  | 23.470               | 0.203          | 0.510        | 0.02              |
| 2  | 24.077               | 0.562          | 1.339        | 0.06              |
| 3  | 25.823               | 247.863        | 323.864      | 25.71             |
| 4  | 30.600               | 482.415        | 526.307      | 50.03             |
| 5  | 35.603               | 233.026        | 222.561      | 24.17             |
| 6  | 38.447               | 0.127          | 0.000        | 0.01              |

The product **4af** was analyzed by HPLC (AD-H, hexane/*i*-PrOH = 35/1, detector: 280 nm, flow rate: 0.8 mL/min), d.r. = 1:1, t<sub>1</sub>(minor) = 33.8 min, t<sub>2</sub>(minor) = 36.2 min, t<sub>3</sub>(major) = 57.2 min, t<sub>4</sub>(major) = 61.7 min.

**Rac-4af**

**Asy-4af**

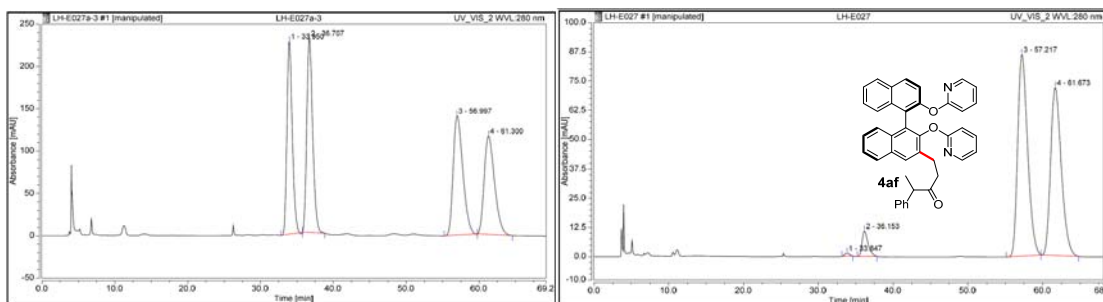

| No | Retention Time<br>min | Area<br>mAU*min | Height<br>mAU | Relative Area<br>% |
|----|-----------------------|-----------------|---------------|--------------------|
| 1  | 33.950                | 192.977         | 227.821       | 23.67              |
| 2  | 36.707                | 215.664         | 229.810       | 26.45              |
| 3  | 56.997                | 215.206         | 141.019       | 26.39              |
| 4  | 61.300                | 191.499         | 116.403       | 23.49              |

| No | Retention Time<br>min | Area<br>mAU*min | Height<br>mAU | Relative Area<br>% |
|----|-----------------------|-----------------|---------------|--------------------|
| 1  | 33.847                | 0.955           | 1.313         | 0.36               |
| 2  | 36.153                | 10.264          | 10.926        | 3.91               |
| 3  | 57.217                | 132.169         | 86.237        | 50.40              |
| 4  | 61.673                | 118.851         | 71.703        | 45.32              |

## 11. Exploration of methyl acrylate and but-3-en-2-ol as the coupling partners

Standard conditions of this manuscript --- **Condition A:** [Cp\*IrCl<sub>2</sub>]<sub>2</sub> (2.0 mg, 5 mol %), AgOAc (16.8 mg, 2.0 equiv), AgOTf (2.6 mg, 0.2 equiv), NaOAc (4.1 mg, 1.0 equiv) and TFE (0.5 mL). The reaction mixture was stirred in preheated oil bath at 140 °C under argon atmosphere for 24 h.

*versus* Standard conditions of our previous work (*Org. Lett.* **2020**, *22*, 4648-4652.) --- **Condition B:** [Cp\*RhCl<sub>2</sub>]<sub>2</sub> (2.1 mg, 7 mol %), Cu(OAc)<sub>2</sub>·H<sub>2</sub>O (30.0 mg, 3.0 equiv), AgSbF<sub>6</sub> (5.1 mg, 0.3 equiv) and DCE (0.5 mL). The reaction mixture was stirred in preheated oil bath at 160 °C under argon atmosphere for 22 h.

When **1a** reacted with **2i** under two conditions, the reaction results were as follows: under condition A, **1a** was destroyed and a very small amount of monoalkenylation product **3ai** was generated. The reaction system was messy by TLC. Under condition B, **1a** was decomposed and no product was generated. The reaction system was messy by TLC.

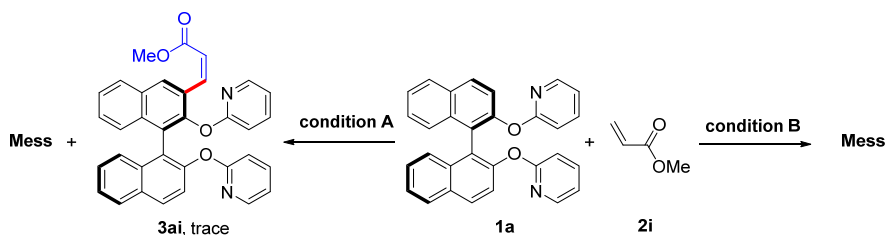

When **1r** reacted with **2a** under two conditions, the reaction results were as follows: under two conditions A and B, **1r** was decomposed and no product was generated.

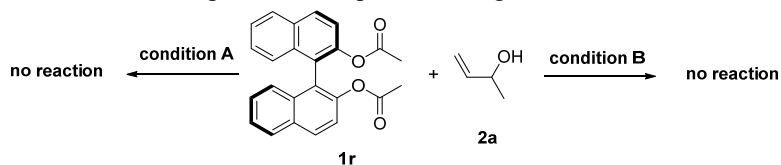

Thus, we could see the unique interaction between **1a** and **2a**.

## 12. Characterization Data and NMR Spectra

### 4,4'-(2,2'-bis(pyridin-2-yloxy)-(R)-[1,1'-binaphthalene]-3,3'-diyl)bis(butan-2-one) (3aa)

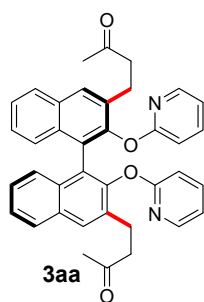

51.6 mg, 89% yield; colorless oil; eluent (petroleum ether/ethyl acetate = 3:1). <sup>1</sup>H NMR (400 MHz, CDCl<sub>3</sub>) δ 7.62 (d, *J* = 4.5 Hz, 2H), 7.58 (d, *J* = 8.2 Hz, 1H), 7.13 (dddd, *J* = 22.1, 8.7, 6.9, 1.8 Hz, 2H), 7.03 – 6.93 (m, 2H), 6.43 (dd, *J* = 7.1, 4.9 Hz, 1H), 6.30 (d, *J* = 8.2 Hz, 1H), 2.93 (t, *J* = 7.6 Hz, 2H), 2.78 (tt, *J* = 19.5, 7.4 Hz, 2H), 2.03 (s, 3H). <sup>13</sup>C NMR (100 MHz, CDCl<sub>3</sub>) δ 208.2, 163.2, 149.6, 147.0, 138.4, 133.8, 132.4, 131.2, 129.0, 127.1, 126.6, 125.1, 125.0, 117.5, 110.5, 43.8, 30.0, 25.8. HRMS (ESI-TOF) *m/z*: [M + H]<sup>+</sup> Calcd for C<sub>38</sub>H<sub>33</sub>N<sub>2</sub>O<sub>4</sub> 581.2435; Found 581.2440. [α]<sub>D</sub><sup>26</sup> = -88.8 (c = 0.51, chloroform). The product was analyzed by HPLC to

determine the enantiomeric excess: >98% ee (AD-H, hexane/*i*-PrOH = 80/20, detector: 254 nm, flow rate: 0.8 mL/min), t<sub>1</sub>(major) = 8.2 min, t<sub>2</sub>(minor) = 12.1 min.

### 4-(2,2'-bis(pyridin-2-yloxy)-(R)-[1,1'-binaphthalen]-3-yl)butan-2-one (4aa)

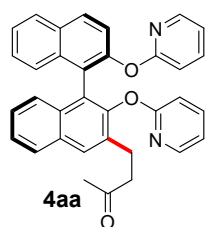

7.7 mg, 30% yield; colorless oil; eluent (petroleum ether/ethyl acetate = 5:1). <sup>1</sup>H NMR (400 MHz, CDCl<sub>3</sub>) δ 7.83 (dd, *J* = 5.0, 2.0 Hz, 1H), 7.74 – 7.55 (m, 5H), 7.31 – 7.26 (m, 1H), 7.26 – 7.17 (m, 2H), 7.17 – 7.13 (m, 1H), 7.12 – 6.98 (m, 5H), 6.67 – 6.60 (m, 1H), 6.45 – 6.37 (m, 2H), 6.25 (d, *J* = 8.3 Hz, 1H), 2.87 (t, *J* = 7.6 Hz, 2H), 2.71 (dd, *J* = 8.2, 6.0 Hz, 2H), 1.95 (s, 3H). <sup>13</sup>C NMR (100 MHz, CDCl<sub>3</sub>) δ 208.3, 163.4, 163.3, 150.0, 149.6, 147.1, 147.0, 138.7, 138.4, 133.8, 133.5, 132.8,

131.5, 130.8, 129.3, 129.1, 127.6, 127.4, 126.7, 126.2, 125.8, 125.5, 125.2, 125.1, 124.8, 123.5, 121.6, 117.9, 117.5, 111.6, 110.6, 43.7, 30.0, 25.9. HRMS (ESI-TOF) *m/z*: [M + H]<sup>+</sup> Calcd for C<sub>34</sub>H<sub>27</sub>N<sub>2</sub>O<sub>3</sub> 511.2016; Found 511.2020. [α]<sub>D</sub><sup>26</sup> = 3.6 (c = 0.11, chloroform). The product was analyzed by HPLC to determine the enantiomeric excess: >98% ee (AD-H, hexane/*i*-PrOH = 80/20, detector: 254 nm, flow rate: 0.8 mL/min), t<sub>1</sub>(minor) = 8.3 min, t<sub>2</sub>(major) = 8.8 min.

The crude material **1a** of **3aa** and **4aa** was analyzed by HPLC to determine the enantiomeric excess: >98% ee (AD-H, hexane/*i*-PrOH = 90/10, detector: 280 nm, flow rate: 0.8 mL/min), t<sub>1</sub>(minor) = 10.3 min, t<sub>2</sub>(major) = 14.5 min. So the process of C-H functionalization didn't affect the ee of the compounds.

### 4-(3'-methyl-2,2'-bis(pyridin-2-yloxy)-(R)-[1,1'-binaphthalen]-3-yl)butan-2-one (3ba)

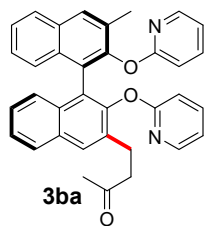

49.3 mg, 94% yield; colorless oil; eluent (petroleum ether/ethyl acetate = 3:1). <sup>1</sup>H NMR (400 MHz, CDCl<sub>3</sub>) δ 7.71 (dd, *J* = 5.0, 1.9 Hz, 1H), 7.65 – 7.52 (m, 5H), 7.14 (qd, *J* = 7.8, 3.9 Hz, 3H), 7.09 – 6.99 (m, 3H), 6.98 – 6.87 (m, 2H), 6.47 (dd, *J* = 7.1, 5.0 Hz, 1H), 6.40 (dd, *J* = 7.2, 5.0 Hz, 1H), 6.32 (d, *J* = 8.3 Hz, 1H), 6.27 (d, *J* = 8.2 Hz, 1H), 2.91 (t, *J* = 7.6 Hz, 2H), 2.73 (tq, *J* = 17.3, 9.0, 8.1 Hz, 2H), 2.27 (s, 3H), 1.99 (s, 3H). <sup>13</sup>C NMR (100 MHz, CDCl<sub>3</sub>) δ 208.3, 163.3, 163.3, 149.7, 149.7,

147.1, 147.0, 138.4, 133.9, 132.6, 132.2, 131.3, 131.3, 131.2, 129.6, 129.0, 127.2, 126.8, 126.7, 126.6, 125.3, 125.2, 125.0, 124.9, 124.8, 124.7, 117.5, 117.3, 110.7, 110.4, 43.8, 30.0, 26.0, 17.8. HRMS (ESI-TOF) *m/z*: [M + H]<sup>+</sup> Calcd for C<sub>35</sub>H<sub>29</sub>N<sub>2</sub>O<sub>3</sub> 525.2173; Found 525.2178. [α]<sub>D</sub><sup>26</sup> = -75.0 (c = 1.59, chloroform). The product was analyzed by HPLC to determine the enantiomeric excess: >98% ee (AD-H, hexane/*i*-PrOH = 80/20, detector: 254 nm, flow rate: 0.8 mL/min), t<sub>1</sub>(major) = 5.5 min, t<sub>2</sub>(minor) = 6.3 min.

#### 4-(3'-methoxy-2,2'-bis(pyridin-2-yloxy)-(R)-[1,1'-binaphthalen]-3-yl)butan-2-one (3ca)

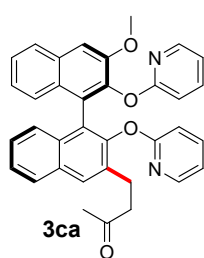

45.9 mg, 85% yield; colorless oil; eluent (petroleum ether/ethyl acetate = 3:1). <sup>1</sup>H NMR (400 MHz, CDCl<sub>3</sub>) δ 7.78 (dd, *J* = 5.1, 1.9 Hz, 1H), 7.71 – 7.63 (m, 3H), 7.57 (d, *J* = 8.2 Hz, 1H), 7.30 – 7.11 (m, 6H), 7.06 – 6.98 (m, 2H), 6.90 (ddd, *J* = 8.2, 6.8, 1.3 Hz, 1H), 6.59 (dd, *J* = 7.2, 5.0 Hz, 1H), 6.51 – 6.42 (m, 2H), 6.36 (d, *J* = 8.3 Hz, 1H), 3.79 (s, 3H), 2.88 (t, *J* = 7.6 Hz, 2H), 2.72 (td, *J* = 8.0, 7.5, 4.4 Hz, 2H), 1.99 (s, 3H). <sup>13</sup>C NMR (100 MHz, CDCl<sub>3</sub>) δ 208.3, 163.3, 151.3, 149.4, 147.0, 146.9, 141.6, 138.5, 138.3, 133.8, 132.6, 131.8, 131.4, 129.2, 128.4, 127.2, 126.8, 126.5, 126.3, 126.3, 125.4, 125.3, 125.2, 124.9, 123.4, 117.5, 117.4, 110.6, 110.3, 107.6, 55.8, 43.7, 30.0, 26.0. HRMS (ESI-TOF) *m/z*: [M + H]<sup>+</sup> Calcd for C<sub>35</sub>H<sub>29</sub>N<sub>2</sub>O<sub>4</sub> 541.2122; Found 541.2125. [α]<sub>D</sub><sup>26</sup> = -49.5 (*c* = 0.44, chloroform). The product was analyzed by HPLC to determine the enantiomeric excess: >99% ee (AD-H, hexane/*i*-PrOH = 90/10, detector: 254 nm, flow rate: 0.8 mL/min), *t*<sub>1</sub>(major) = 16.7 min, *t*<sub>2</sub>(minor) = 20.8 min.

#### 4-(3'-bromo-2,2'-bis(pyridin-2-yloxy)-(R)-[1,1'-binaphthalen]-3-yl)butan-2-one (3da)

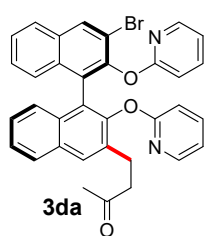

43.5 mg, 74% yield; colorless oil; eluent (petroleum ether/ethyl acetate = 3:1). <sup>1</sup>H NMR (400 MHz, CDCl<sub>3</sub>) δ 8.09 (s, 1H), 7.77 – 7.67 (m, 2H), 7.67 – 7.56 (m, 3H), 7.25 – 7.19 (m, 3H), 7.19 – 7.13 (m, 1H), 7.11 – 6.99 (m, 4H), 6.56 (dd, *J* = 7.2, 5.0 Hz, 1H), 6.45 (dd, *J* = 11.4, 7.5 Hz, 2H), 6.36 (d, *J* = 8.3 Hz, 1H), 2.93 (t, *J* = 7.6 Hz, 2H), 2.77 (tq, *J* = 17.2, 8.9, 8.0 Hz, 2H), 2.03 (s, 3H). <sup>13</sup>C NMR (151 MHz, CDCl<sub>3</sub>) δ 208.1, 163.2, 162.7, 149.7, 147.0, 146.9, 146.8, 138.5, 133.8, 132.5, 132.4, 132.2, 131.7, 131.2, 129.4, 127.3, 127.2, 127.2, 127.1, 126.6, 126.4, 125.9, 125.8, 125.3, 125.1, 124.4, 117.7, 117.6, 116.9, 110.8, 110.5, 43.7, 30.0, 25.9. HRMS (ESI-TOF) *m/z*: [M + H]<sup>+</sup> Calcd for C<sub>34</sub>H<sub>26</sub>BrN<sub>2</sub>O<sub>3</sub> 589.1121; Found 589.1125. [α]<sub>D</sub><sup>26</sup> = -10.2 (*c* = 2.39, chloroform). The product was analyzed by HPLC to determine the enantiomeric excess: >99% ee (AD-H, hexane/*i*-PrOH = 80/20, detector: 280 nm, flow rate: 0.8 mL/min), *t*<sub>1</sub>(major) = 6.8 min, *t*<sub>2</sub>(minor) = 9.8 min.

#### 4,4'-(6,6'-dimethyl-2,2'-bis(pyridin-2-yloxy)-(R)-[1,1'-binaphthalene]-3,3'-diyl)bis(butan-2-one) (3ea)

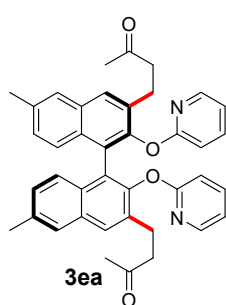

(3ea) 55.9 mg, 92% yield; colorless oil; eluent (petroleum ether/ethyl acetate = 3:1). <sup>1</sup>H NMR (400 MHz, CDCl<sub>3</sub>) δ 7.66 (dd, *J* = 5.0, 2.0 Hz, 1H), 7.53 (s, 1H), 7.36 (s, 1H), 7.12 (ddd, *J* = 8.9, 7.3, 1.9 Hz, 1H), 6.90 (d, *J* = 8.6 Hz, 1H), 6.79 (dd, *J* = 8.6, 1.8 Hz, 1H), 6.45 (dd, *J* = 7.2, 4.9 Hz, 1H), 6.30 (d, *J* = 8.3 Hz, 1H), 2.88 (t, *J* = 7.5 Hz, 2H), 2.74 (tt, *J* = 19.2, 7.3 Hz, 2H), 2.28 (s, 3H), 2.01 (s, 3H). <sup>13</sup>C NMR (100 MHz, CDCl<sub>3</sub>) δ 208.3, 163.3, 148.8, 147.0, 138.4, 134.5, 133.6, 131.5, 130.7, 128.3, 127.4, 126.5, 126.1, 125.1, 117.4, 110.5, 43.9, 30.0, 25.9, 21.5. HRMS (ESI-TOF) *m/z*: [M + H]<sup>+</sup> Calcd for C<sub>40</sub>H<sub>37</sub>N<sub>2</sub>O<sub>4</sub> 609.2748; Found 609.2753. [α]<sub>D</sub><sup>25</sup> = -67.1 (*c* = 0.38, chloroform). The product was analyzed by HPLC to determine the enantiomeric excess: >99% ee (AD-H, hexane/*i*-PrOH = 90/10, detector: 280 nm, flow rate: 0.8 mL/min), *t*<sub>1</sub>(major) = 16.4 min, *t*<sub>2</sub>(minor) = 25.7 min.

#### 4,4'-(6,6'-di-tert-butyl-2,2'-bis(pyridin-2-yloxy)-(R)-[1,1'-binaphthalene]-3,3'-diyl)bis(butan-2-

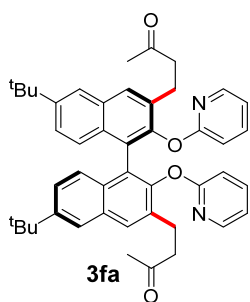

**one) (3fa)** 64.4 mg, 93% yield; colorless oil; eluent (petroleum ether/ethyl acetate = 3:1). <sup>1</sup>H NMR (400 MHz, CDCl<sub>3</sub>) δ 7.73 (dd, *J* = 4.9, 2.0 Hz, 1H), 7.68 (s, 1H), 7.59 (d, *J* = 2.1 Hz, 1H), 7.21 – 7.08 (m, 2H), 7.03 (d, *J* = 8.9 Hz, 1H), 6.50 (dd, *J* = 7.2, 5.0 Hz, 1H), 6.33 (d, *J* = 8.3 Hz, 1H), 2.99 (t, *J* = 7.6 Hz, 2H), 2.81 (dt, *J* = 11.8, 7.8 Hz, 2H), 2.10 (s, 3H), 1.31 (s, 9H). <sup>13</sup>C NMR (151 MHz, CDCl<sub>3</sub>) δ 208.3, 163.4, 149.0, 147.5, 147.0, 138.2, 133.5, 131.1, 130.6, 128.9, 126.3, 124.8, 123.9, 122.0, 117.3, 110.5, 43.9, 34.5, 31.1, 29.9, 25.8. HRMS (ESI-TOF) *m/z*: [M + H]<sup>+</sup> Calcd for C<sub>46</sub>H<sub>49</sub>N<sub>2</sub>O<sub>4</sub> 693.3687; Found

693.3688. [α]<sub>D</sub><sup>26</sup> = -36.7 (*c* = 0.32, chloroform). The product was analyzed by HPLC to determine the enantiomeric excess: >95% ee (AD-H, hexane/*i*-PrOH = 80/20, detector: 280 nm, flow rate: 0.8 mL/min), *t*<sub>1</sub>(minor) = 7.9 min, *t*<sub>2</sub>(major) = 9.3 min.

The crude material **1f** of **3fa** was analyzed by HPLC to determine the enantiomeric excess: >95% ee (AD-H, hexane/*i*-PrOH = 90/10, detector: 280 nm, flow rate: 0.8 mL/min), *t*<sub>1</sub>(minor) = 9.8 min, *t*<sub>2</sub>(major) = 11.3 min. So the process of C-H functionalization didn't affect the ee of the compounds.

#### 4,4'-(6,6'-diphenyl-2,2'-bis(pyridin-2-yloxy)-(R)-[1,1'-binaphthalene]-3,3'-diyl)bis(butan-2-one)

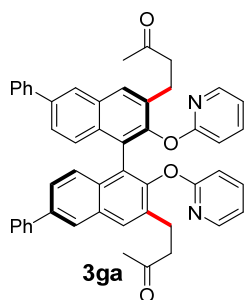

**(3ga)** 65.1 mg, 89% yield; colorless oil; eluent (petroleum ether/ethyl acetate = 3:1). <sup>1</sup>H NMR (400 MHz, CDCl<sub>3</sub>) δ 7.69 (d, *J* = 1.9 Hz, 1H), 7.58 (s, 1H), 7.53 (dd, *J* = 5.1, 1.9 Hz, 1H), 7.42 (d, *J* = 7.6 Hz, 2H), 7.23 (t, *J* = 7.5 Hz, 2H), 7.16 – 7.08 (m, 2H), 7.04 – 6.97 (m, 2H), 6.31 (dd, *J* = 7.2, 5.0 Hz, 1H), 6.21 (d, *J* = 8.3 Hz, 1H), 2.82 (t, *J* = 7.6 Hz, 2H), 2.66 (qd, *J* = 17.1, 7.8 Hz, 2H), 1.92 (s, 3H). <sup>13</sup>C NMR (100 MHz, CDCl<sub>3</sub>) δ 208.2, 163.3, 149.8, 147.1, 141.0, 138.5, 137.6, 134.3, 131.7, 131.5, 129.4, 128.8, 127.3, 127.2, 125.0, 125.0, 124.8, 117.6, 110.6, 43.8, 30.0, 25.9. HRMS (ESI-TOF) *m/z*: [M + H]<sup>+</sup> Calcd for

C<sub>50</sub>H<sub>41</sub>N<sub>2</sub>O<sub>4</sub> 733.3061; Found 733.3064. [α]<sub>D</sub><sup>25</sup> = -1.2 (*c* = 1.07, chloroform). The product was analyzed by HPLC to determine the enantiomeric excess: >99% ee (AD-H, hexane/*i*-PrOH = 80/20, detector: 220 nm, flow rate: 0.8 mL/min), *t*<sub>1</sub>(major) = 10.0 min, *t*<sub>2</sub>(minor) = 11.7 min.

#### 4,4'-(6,6'-dibromo-2,2'-bis(pyridin-2-yloxy)-(R)-[1,1'-binaphthalene]-3,3'-diyl)bis(butan-2-one)

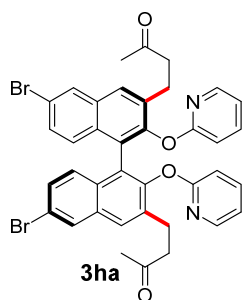

**(3ha)** 16.2 mg, 22% yield; colorless oil; eluent (petroleum ether/ethyl acetate = 3:1). <sup>1</sup>H NMR (400 MHz, CDCl<sub>3</sub>) δ 7.71 (d, *J* = 2.0 Hz, 1H), 7.57 (dd, *J* = 5.1, 2.0 Hz, 1H), 7.50 (s, 1H), 7.16 – 7.06 (m, 1H), 6.99 (dd, *J* = 9.0, 2.1 Hz, 1H), 6.80 (d, *J* = 9.0 Hz, 1H), 6.44 (dd, *J* = 7.2, 5.0 Hz, 1H), 6.27 (d, *J* = 8.3 Hz, 1H), 2.87 (t, *J* = 7.6 Hz, 2H), 2.79 – 2.61 (m, 2H), 1.99 (s, 3H). <sup>13</sup>C NMR (100 MHz, CDCl<sub>3</sub>) δ 206.7, 162.0, 149.0, 145.9, 137.6, 134.3, 131.2, 129.7, 128.1, 127.4, 127.2, 123.8, 118.1, 116.8, 109.5, 42.5, 28.9, 24.6. HRMS (ESI-TOF) *m/z*: [M + H]<sup>+</sup> Calcd for C<sub>38</sub>H<sub>31</sub>Br<sub>2</sub>N<sub>2</sub>O<sub>4</sub> 737.0645; Found 737.0649. [α]<sub>D</sub><sup>26</sup> = -47.4 (*c* =

1.68, chloroform). The product was analyzed by HPLC to determine the enantiomeric excess: >99% ee (AD-H, hexane/*i*-PrOH = 65/35, detector: 280 nm, flow rate: 0.6 mL/min), *t*<sub>1</sub>(major) = 7.7 min, *t*<sub>2</sub>(minor) = 37.6 min.

#### 4-(6,6'-dibromo-2,2'-bis(pyridin-2-yloxy)-(R)-[1,1'-binaphthalen]-3-yl)butan-2-one (4ha)

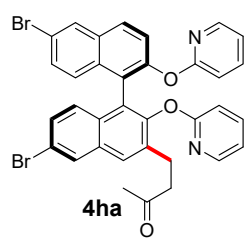

46.0 mg, 69% yield; colorless oil; eluent (petroleum ether/ethyl acetate = 5:1).  $^1\text{H}$  NMR (400 MHz,  $\text{CDCl}_3$ )  $\delta$  7.91 (dd,  $J = 19.0, 2.2$  Hz, 3H), 7.74 – 7.66 (m, 3H), 7.45 – 7.36 (m, 2H), 7.26 – 7.17 (m, 3H), 7.04 (t,  $J = 8.3$  Hz, 2H), 6.79 (dd,  $J = 7.2, 5.0$  Hz, 1H), 6.60 – 6.51 (m, 2H), 6.37 (d,  $J = 8.2$  Hz, 1H), 2.97 (t,  $J = 7.5$  Hz, 2H), 2.80 (dd,  $J = 9.3, 6.9$  Hz, 2H), 2.07 (s, 3H).  $^{13}\text{C}$  NMR (100 MHz,  $\text{CDCl}_3$ )  $\delta$  207.8, 163.1, 163.0, 150.3, 150.0, 147.1, 147.0, 138.9, 138.7, 135.4, 132.5, 131.9, 131.8, 131.1, 129.6, 129.4, 129.2, 128.9, 128.5, 128.4, 128.3, 127.8, 124.8, 123.3, 122.9, 119.4, 118.9, 118.3, 117.8, 111.6, 110.6, 43.4, 30.0, 25.7. HRMS (ESI-TOF)  $m/z$ :  $[\text{M} + \text{H}]^+$  Calcd for  $\text{C}_{34}\text{H}_{25}\text{Br}_2\text{N}_2\text{O}_3$  667.0226; Found 667.0230.  $[\alpha]_D^{24} = 1.9$  ( $c = 0.68$ , chloroform). The product was analyzed by HPLC to determine the enantiomeric excess: >94% ee (AD-H, hexane/*i*-PrOH = 80/20, detector: 280 nm, flow rate: 0.8 mL/min),  $t_1$ (major) = 10.8 min,  $t_2$ (minor) = 12.7 min.

#### 4-(6,6'-dibenzhydryl-2,2'-bis(pyridin-2-yloxy)-(R)-[1,1'-binaphthalen]-3-yl)butan-2-one (4ia)

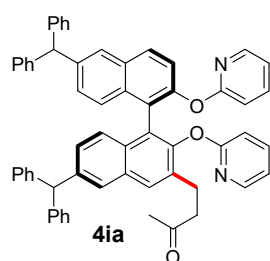

21.1 mg, 25% yield; colorless oil; eluent (petroleum ether/ethyl acetate = 5:1).  $^1\text{H}$  NMR (400 MHz,  $\text{CDCl}_3$ )  $\delta$  7.86 (dd,  $J = 5.0, 2.0$  Hz, 1H), 7.69 – 7.57 (m, 3H), 7.36 – 7.22 (m, 14H), 7.20 (dq,  $J = 8.1, 3.7, 2.8$  Hz, 4H), 7.15 – 7.12 (m, 1H), 7.11 – 7.01 (m, 8H), 6.92 (ddd,  $J = 8.8, 4.7, 1.9$  Hz, 2H), 6.69 (dd,  $J = 7.1, 5.0$  Hz, 1H), 6.48 (dd,  $J = 7.8, 4.0$  Hz, 2H), 6.32 (d,  $J = 8.3$  Hz, 1H), 5.56 (d,  $J = 5.6$  Hz, 2H), 2.90 (t,  $J = 7.2$  Hz, 2H), 2.76 (dd,  $J = 9.0, 7.1$  Hz, 2H), 2.03 (s, 3H).  $^{13}\text{C}$  NMR (151 MHz,  $\text{CDCl}_3$ )  $\delta$  208.2, 163.5, 163.3, 149.9, 149.4, 147.1, 147.0, 143.7, 143.7, 143.6, 140.7, 140.2, 138.5, 138.3, 133.9, 132.1, 131.3, 130.7, 129.5, 129.5, 129.2, 128.9, 128.2, 128.2, 128.2, 127.9, 127.7, 127.4, 127.3, 126.8, 126.3, 126.3, 124.8, 123.5, 121.7, 117.7, 117.3, 111.4, 110.6, 56.7, 56.6, 43.7, 29.9, 25.7. HRMS (ESI-TOF)  $m/z$ :  $[\text{M} + \text{H}]^+$  Calcd for  $\text{C}_{60}\text{H}_{47}\text{N}_2\text{O}_3$  843.3581; Found 843.3543.  $[\alpha]_D^{26} = 28.5$  ( $c = 0.11$ , chloroform). The product was analyzed by HPLC to determine the enantiomeric excess: >99% ee (AD-H, hexane/*i*-PrOH = 80/20, detector: 220 nm, flow rate: 0.8 mL/min),  $t_1$ (minor) = 7.0 min,  $t_2$ (major) = 7.6 min.

#### 4,4'-(2,2'-bis(pyridin-2-yloxy)-5,6-dihydro-[1,1'-biphenyl]-3,3'-diyl)bis(butan-2-one) (3ja)

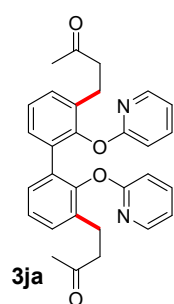

39.0 mg, 81% yield; colorless oil; eluent (petroleum ether/ethyl acetate = 5:1).  $^1\text{H}$  NMR (400 MHz,  $\text{CDCl}_3$ )  $\delta$  7.99 (d,  $J = 4.9$  Hz, 1H), 7.44 (td,  $J = 7.9, 7.4, 1.9$  Hz, 1H), 7.11 (dd,  $J = 7.3, 1.9$  Hz, 1H), 7.04 – 6.91 (m, 2H), 6.84 – 6.74 (m, 1H), 6.56 (d,  $J = 8.3$  Hz, 1H), 2.73 (t,  $J = 8.0$  Hz, 2H), 2.65 (dd,  $J = 11.2, 4.9$  Hz, 2H), 2.03 (s, 3H).  $^{13}\text{C}$  NMR (100 MHz,  $\text{CDCl}_3$ )  $\delta$  208.1, 163.5, 149.4, 147.3, 138.9, 134.0, 131.9, 129.7, 129.7, 125.0, 117.7, 110.5, 43.7, 29.9, 25.1. HRMS (ESI-TOF)  $m/z$ :  $[\text{M} + \text{Na}]^+$  Calcd for  $\text{C}_{30}\text{H}_{28}\text{N}_2\text{NaO}_4$  503.1941; Found 503.1964.



#### 4,4'-(2,2'-bis(pyridin-2-yloxy)-5,5',6,6',7,7',8,8'-octahydro-(R)-[1,1'-binaphthalene]-3,3'-

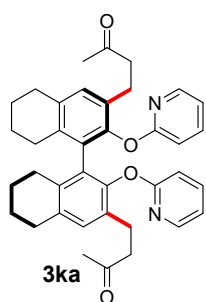

**diyl)bis(butan-2-one) (3ka)** 50.0 mg, 85% yield; colorless oil; eluent (petroleum ether/ethyl acetate = 3:1). <sup>1</sup>H NMR (400 MHz, CDCl<sub>3</sub>) δ 8.00 (dd, *J* = 5.1, 1.9 Hz, 1H), 7.41 (td, *J* = 7.8, 1.9 Hz, 1H), 6.85 (s, 1H), 6.79 (dd, *J* = 7.1, 5.1 Hz, 1H), 6.45 (d, *J* = 8.3 Hz, 1H), 2.70 (tdd, *J* = 16.9, 12.8, 7.7 Hz, 5H), 2.49 (dt, *J* = 16.0, 7.0 Hz, 1H), 2.23 – 2.11 (m, 2H), 2.07 (s, 3H), 1.52 (dh, *J* = 13.9, 6.7, 4.3 Hz, 3H), 1.16 (tdd, *J* = 11.6, 9.3, 8.3, 5.2 Hz, 1H). <sup>13</sup>C NMR (100 MHz, CDCl<sub>3</sub>) δ 208.6, 163.4, 147.5, 147.1, 138.6, 135.7, 134.0, 131.1, 130.0, 129.7, 117.5, 110.8, 44.1, 29.9, 29.4, 26.8, 25.1, 22.9, 22.7. HRMS (ESI-TOF) *m/z*: [M + H]<sup>+</sup> Calcd for C<sub>38</sub>H<sub>41</sub>N<sub>2</sub>O<sub>4</sub> 589.3061; Found 589.3062. [α]<sub>D</sub><sup>26</sup> = -191.1 (*c* = 0.21, chloroform). The product was analyzed by HPLC to determine the enantiomeric excess: >99% ee (AD-H, hexane/*i*-PrOH = 80/20, detector: 280 nm, flow rate: 0.8 mL/min), *t*<sub>1</sub>(major) = 5.2 min, *t*<sub>2</sub>(minor) = 8.2 min.

#### 4,4'-(2,2'-bis((3-methylpyridin-2-yl)oxy)-(R)-[1,1'-binaphthalene]-3,3'-diyl)bis(butan-2-one) (3la)

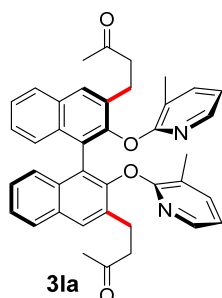

*t*<sub>1</sub>(major) = 9.5 min, *t*<sub>2</sub>(minor) = 10.4 min.

32.2 mg, 53% yield; colorless oil; eluent (petroleum ether/ethyl acetate = 3:1). <sup>1</sup>H NMR (400 MHz, CDCl<sub>3</sub>) δ 7.58 (d, *J* = 24.0 Hz, 2H), 7.40 – 6.71 (m, 5H), 6.22 (s, 1H), 2.93 (d, *J* = 68.9 Hz, 4H), 1.99 (d, *J* = 27.3 Hz, 6H). <sup>13</sup>C NMR (100 MHz, CDCl<sub>3</sub>) δ 208.3, 161.6, 150.0, 144.1, 138.4, 132.2, 131.0, 128.5, 126.9, 124.7, 120.4, 117.4, 43.8, 29.9, 25.5, 15.4. HRMS (ESI-TOF) *m/z*: [M + H]<sup>+</sup> Calcd for C<sub>40</sub>H<sub>37</sub>N<sub>2</sub>O<sub>4</sub> 609.2748; Found 609.2753. [α]<sub>D</sub><sup>26</sup> = -31.5 (*c* = 1.19, chloroform). The product was analyzed by HPLC to determine the enantiomeric excess: >99% ee (AD-H, hexane/*i*-PrOH = 90/10, detector: 280 nm, flow rate: 0.8 mL/min),

#### 4-(2,2'-bis((3-methylpyridin-2-yl)oxy)-(R)-[1,1'-binaphthalen]-3-yl)butan-2-one (4la)

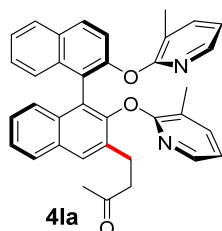

detector: 220 nm, flow rate: 0.8 mL/min), *t*<sub>1</sub>(minor) = 5.7 min, *t*<sub>2</sub>(major) = 7.0 min.

13.5 mg, 25% yield; colorless oil; eluent (petroleum ether/ethyl acetate = 5:1). <sup>1</sup>H NMR (400 MHz, CDCl<sub>3</sub>) δ 8.03 – 7.59 (m, 5H), 7.58 – 6.87 (m, 10H), 6.48 (d, *J* = 83.6 Hz, 2H), 3.08 (td, *J* = 7.5, 3.6 Hz, 2H), 2.90 (td, *J* = 21.5, 19.0, 10.6 Hz, 2H), 2.12 (s, 3H), 2.03 – 1.45 (m, 6H). <sup>13</sup>C NMR (100 MHz, CDCl<sub>3</sub>) δ 208.3, 161.6, 144.1, 138.7, 138.5, 132.7, 131.3, 130.7, 128.6, 127.2, 126.5, 125.2, 125.0, 124.6, 122.2, 117.7, 117.4, 43.9, 30.0, 25.7, 15.4. HRMS (ESI-TOF) *m/z*: [M + H]<sup>+</sup> Calcd for C<sub>36</sub>H<sub>31</sub>N<sub>2</sub>O<sub>3</sub> 539.2329; Found 539.2333. [α]<sub>D</sub><sup>26</sup> = -12.3 (*c* = 0.45, chloroform). The product was analyzed by HPLC to determine the enantiomeric excess: >98% ee (AD-H, hexane/*i*-PrOH = 80/20,

#### 4,4'-(2,2'-bis((3-methoxypyridin-2-yl)oxy)-(R)-[1,1'-binaphthalene]-3,3'-diyl)bis(butan-2-one)

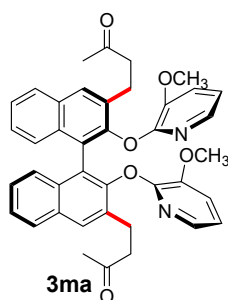

**(3ma)** 37.8 mg, 59% yield; colorless oil; eluent (petroleum ether/ethyl acetate = 3:1). <sup>1</sup>H NMR (400 MHz, CDCl<sub>3</sub>) δ 7.68 (s, 1H), 7.63 (d, *J* = 8.2 Hz, 1H), 7.24 – 7.16 (m, 2H), 7.07 (d, *J* = 8.4 Hz, 1H), 7.00 – 6.94 (m, 1H), 6.58 (dd, *J* = 7.8, 1.6 Hz, 1H), 6.39 (dd, *J* = 7.8, 4.9 Hz, 1H), 3.50 (s, 3H), 3.12 – 2.92 (m, 3H), 2.82 (ddd, *J* = 16.4, 9.0, 6.3 Hz, 1H), 2.11 (s, 3H). <sup>13</sup>C NMR (100 MHz, CDCl<sub>3</sub>) δ 208.5, 153.9, 150.6, 143.7, 137.5, 134.1, 132.3, 131.0, 128.4, 126.8, 124.8, 124.7, 124.7, 119.2, 117.9, 55.8, 43.8, 29.9, 25.7. HRMS (ESI-TOF) *m/z*: [M + H]<sup>+</sup> Calcd for C<sub>40</sub>H<sub>37</sub>N<sub>2</sub>O<sub>6</sub> 641.2646; Found 641.2646. [α]<sub>D</sub><sup>25</sup> = -81.8 (*c* = 1.15,



chloroform). The product was analyzed by HPLC to determine the enantiomeric excess: >98% ee (AD-H, hexane/i-PrOH = 80/20, detector: 280 nm, flow rate: 0.8 mL/min),  $t_1$ (major) = 9.1 min,  $t_2$ (minor) = 15.0 min.

**4-(2,2'-bis((3-methoxypyridin-2-yl)oxy)-(R)-[1,1'-binaphthalen]-3-yl)butan-2-one (4ma)**

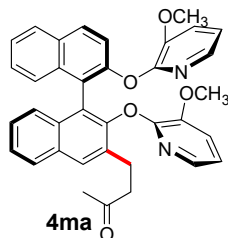

13.7 mg, 24% yield; colorless oil; eluent (petroleum ether/ethyl acetate = 5:1).  $^1\text{H}$  NMR (400 MHz,  $\text{CDCl}_3$ )  $\delta$  7.73 (d,  $J$  = 8.9 Hz, 1H), 7.70 – 7.61 (m, 3H), 7.36 – 7.27 (m, 2H), 7.23 – 7.11 (m, 5H), 7.05 – 6.96 (m, 2H), 6.70 (dd,  $J$  = 5.6, 4.0 Hz, 1H), 6.52 (td,  $J$  = 8.3, 7.4, 4.5 Hz, 2H), 6.37 (dd,  $J$  = 7.8, 4.9 Hz, 1H), 3.39 (s, 3H), 3.31 (s, 3H), 3.03 – 2.75 (m, 4H), 2.03 (s, 4H).  $^{13}\text{C}$  NMR (100 MHz,  $\text{CDCl}_3$ )  $\delta$  208.6, 154.0, 154.0, 150.7, 150.6, 144.3, 143.9, 137.8, 137.5, 134.1, 133.6, 132.7, 131.3, 130.7, 128.8, 128.7, 127.3, 127.1, 126.9, 126.6, 125.5, 125.1, 124.9, 124.9, 124.6, 123.5, 121.9, 120.4, 119.1, 118.3, 118.0, 56.3, 55.8, 43.8, 30.0, 25.9. HRMS (ESI-TOF)  $m/z$ :  $[\text{M} + \text{H}]^+$  Calcd for  $\text{C}_{36}\text{H}_{31}\text{N}_2\text{O}_5$  571.2227; Found 571.2230.  $[\alpha]_D^{26}$  = -6.7 ( $c$  = 0.14, chloroform). The product was analyzed by HPLC to determine the enantiomeric excess: >99% ee (AD-H, hexane/i-PrOH = 80/20, detector: 254 nm, flow rate: 0.8 mL/min),  $t_1$ (minor) = 8.6 min,  $t_2$ (major) = 13.5 min.

**4,4'-(2,2'-bis((5-methylpyridin-2-yl)oxy)-(R)-[1,1'-binaphthalene]-3,3'-diyl)bis(butan-2-one) (3na)**

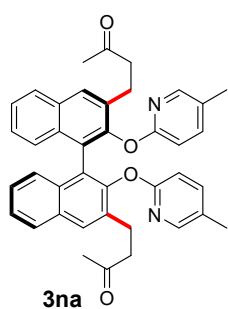

59.6 mg, 98% yield; colorless oil; eluent (petroleum ether/ethyl acetate = 5:1).  $^1\text{H}$  NMR (400 MHz,  $\text{CDCl}_3$ )  $\delta$  7.61 (s, 1H), 7.56 (d,  $J$  = 8.2 Hz, 1H), 7.38 (d,  $J$  = 2.5 Hz, 1H), 7.13 (ddd,  $J$  = 8.1, 6.4, 1.5 Hz, 1H), 7.00 – 6.90 (m, 2H), 6.86 (dd,  $J$  = 8.4, 2.5 Hz, 1H), 6.15 (d,  $J$  = 8.3 Hz, 1H), 2.93 (t,  $J$  = 7.6 Hz, 2H), 2.78 (qd,  $J$  = 17.1, 7.7 Hz, 2H), 2.02 (s, 3H), 1.84 (s, 3H).  $^{13}\text{C}$  NMR (100 MHz,  $\text{CDCl}_3$ )  $\delta$  208.3, 161.6, 150.1, 146.6, 139.1, 133.8, 132.4, 131.1, 129.0, 127.1, 126.7, 126.5, 125.0, 125.0, 124.8, 110.0, 43.8, 30.0, 26.0, 17.2. HRMS (ESI-TOF)  $m/z$ :  $[\text{M} + \text{H}]^+$  Calcd for  $\text{C}_{40}\text{H}_{37}\text{N}_2\text{O}_4$  609.2748; Found 609.2750.  $[\alpha]_D^{25}$  = -33.3 ( $c$  = 0.54, chloroform). The product was analyzed by HPLC to determine the enantiomeric excess: >97% ee (AD-H, hexane/i-PrOH = 90/10, detector: 280 nm, flow rate: 0.8 mL/min),  $t_1$ (major) = 25.9 min,  $t_2$ (minor) = 30.0 min.

**4,4'-(2,2'-bis((4-methylpyridin-2-yl)oxy)-(R)-[1,1'-binaphthalene]-3,3'-diyl)bis(butan-2-one) (3oa)**

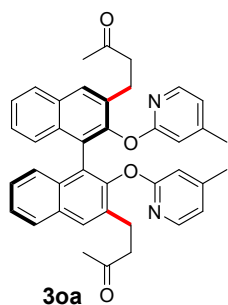

52.3 mg, 86% yield; colorless oil; eluent (petroleum ether/ethyl acetate = 3:1).  $^1\text{H}$  NMR (400 MHz,  $\text{CDCl}_3$ )  $\delta$  7.65 – 7.55 (m, 2H), 7.47 (d,  $J$  = 5.2 Hz, 1H), 7.19 – 7.12 (m, 1H), 7.05 – 6.92 (m, 2H), 6.22 (d,  $J$  = 5.2 Hz, 1H), 6.08 (s, 1H), 2.93 (t,  $J$  = 7.6 Hz, 2H), 2.87 – 2.68 (m, 2H), 2.03 (s, 3H), 1.91 (s, 3H).  $^{13}\text{C}$  NMR (100 MHz,  $\text{CDCl}_3$ )  $\delta$  207.2, 162.5, 148.8, 148.6, 145.5, 132.7, 131.4, 130.1, 128.0, 126.0, 125.5, 124.0, 123.9, 123.9, 117.9, 109.8, 42.8, 29.0, 24.9, 19.5. HRMS (ESI-TOF)  $m/z$ :  $[\text{M} + \text{H}]^+$  Calcd for  $\text{C}_{40}\text{H}_{37}\text{N}_2\text{O}_4$  609.2748; Found 609.2749.  $[\alpha]_D^{25}$  = -12.7 ( $c$  = 0.86, chloroform). The product was analyzed by HPLC to determine the enantiomeric excess: >95% ee (AD-H, hexane/i-PrOH = 80/20, detector: 280 nm, flow rate: 0.8 mL/min),  $t_1$ (minor) = 6.0 min,  $t_2$ (major) = 7.6 min.

The crude material of **3ab** was analyzed by HPLC to determine the enantiomeric excess: >96% ee (AD-H, hexane/i-PrOH = 80/20, detector: 280 nm, flow rate: 0.8 mL/min),  $t_1$ (minor) = 7.1 min,  $t_2$ (major) =

14.4 min. So the process of C-H functionalization didn't affect the ee of the compounds.

#### 4-(2'-methoxy-2-(pyrimidin-2-yloxy)-(R)-[1,1'-binaphthalen]-3-yl)butan-2-one (3pa)

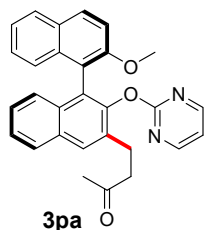

14.8 mg, 33% yield; colorless oil; eluent (petroleum ether/ethyl acetate = 2:1). <sup>1</sup>H NMR (400 MHz, CDCl<sub>3</sub>) δ 8.03 (d, *J* = 4.8 Hz, 2H), 7.81 (d, *J* = 6.9 Hz, 2H), 7.73 (d, *J* = 9.0 Hz, 1H), 7.61 (d, *J* = 8.1 Hz, 1H), 7.34 (t, *J* = 7.4 Hz, 1H), 7.20 (d, *J* = 9.5 Hz, 1H), 7.16 – 7.01 (m, 5H), 6.50 (t, *J* = 4.8 Hz, 1H), 3.66 (s, 3H), 2.99 (dd, *J* = 11.5, 4.9 Hz, 2H), 2.89 (dd, *J* = 11.0, 6.7 Hz, 2H), 2.06 (s, 3H). <sup>13</sup>C NMR (100 MHz, CDCl<sub>3</sub>) δ 208.2, 164.8, 158.9, 155.0, 148.7, 133.3, 133.3, 132.9, 131.9, 129.9, 129.0, 128.7, 127.8, 127.5, 126.0, 126.0, 125.9, 125.9, 125.8, 125.5, 123.3, 117.7, 115.2, 113.4, 43.7, 30.1, 25.8. HRMS (ESI-TOF) *m/z*: [M + H]<sup>+</sup> Calcd for C<sub>29</sub>H<sub>25</sub>N<sub>2</sub>O<sub>3</sub> 449.1860; Found 449.1863. [α]<sub>D</sub><sup>26</sup> = 7.0 (*c* = 0.33, chloroform). The product was analyzed by HPLC to determine the enantiomeric excess: >99% ee (AD-H, hexane/*i*-PrOH = 65/35, detector: 254 nm, flow rate: 0.6 mL/min), t<sub>1</sub>(major) = 7.9 min, t<sub>2</sub>(minor) = 8.8 min.

#### 4-(2'-methoxy-2-(thiazol-2-yloxy)-[1,1'-binaphthalen]-3-yl)butan-2-one (3qa)

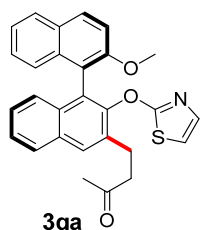

17.7 mg, 39% yield; colorless oil; eluent (petroleum ether/ethyl acetate = 5:1). <sup>1</sup>H NMR (400 MHz, CDCl<sub>3</sub>) δ 7.84 (q, *J* = 5.8, 4.8 Hz, 3H), 7.72 (d, *J* = 8.1 Hz, 1H), 7.42 – 7.34 (m, 1H), 7.23 – 7.10 (m, 5H), 7.01 (d, *J* = 8.5 Hz, 1H), 6.78 (d, *J* = 3.8 Hz, 1H), 6.34 (d, *J* = 3.7 Hz, 1H), 3.62 (s, 3H), 3.10 (t, *J* = 7.7 Hz, 2H), 2.96 – 2.87 (m, 2H), 2.09 (s, 3H). <sup>13</sup>C NMR (100 MHz, CDCl<sub>3</sub>) δ 208.0, 173.5, 154.9, 150.8, 136.8, 133.4, 132.9, 132.8, 132.1, 130.2, 129.4, 128.8, 127.7, 127.7, 126.3, 126.1, 126.1, 126.0, 125.9, 125.4, 123.4, 117.3, 113.1, 112.2, 56.3, 43.8, 30.1, 25.5. HRMS (ESI-TOF) *m/z*: [M + H]<sup>+</sup> Calcd for C<sub>28</sub>H<sub>24</sub>N<sub>2</sub>O<sub>3</sub>S 454.1471; Found 454.1477. [α]<sub>D</sub><sup>25</sup> = 3.1 (*c* = 1.87, chloroform). The product was analyzed by HPLC to determine the enantiomeric excess: >93% ee (AD-H, hexane/*i*-PrOH = 90/10, detector: 280 nm, flow rate: 0.8 mL/min), t<sub>1</sub>(minor) = 7.5 min, t<sub>2</sub>(major) = 8.2 min.

#### 1,1'-(2,2'-bis(pyridin-2-yloxy)-(R)-[1,1'-binaphthalene]-3,3'-diyl)bis(pentan-3-one) (3ab)

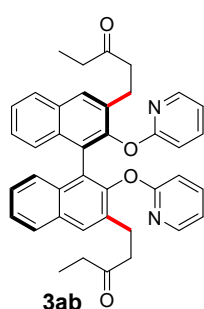

49.9 mg, 82% yield; colorless oil; eluent (petroleum ether/ethyl acetate = 5:1). <sup>1</sup>H NMR (400 MHz, CDCl<sub>3</sub>) δ 7.68 – 7.55 (m, 3H), 7.20 – 7.07 (m, 2H), 6.97 (dt, *J* = 15.1, 8.2 Hz, 2H), 6.42 (dd, *J* = 7.2, 5.0 Hz, 1H), 6.30 (d, *J* = 8.3 Hz, 1H), 2.93 (t, *J* = 7.7 Hz, 2H), 2.73 (dtd, *J* = 24.8, 16.7, 7.2 Hz, 2H), 2.30 (qd, *J* = 7.4, 3.9 Hz, 2H), 0.93 (t, *J* = 7.3 Hz, 3H). <sup>13</sup>C NMR (100 MHz, CDCl<sub>3</sub>) δ 209.8, 162.2, 148.6, 145.9, 137.3, 132.9, 131.3, 130.2, 128.0, 126.1, 125.6, 124.0, 124.0, 123.9, 116.4, 109.5, 41.4, 34.9, 24.9, 6.8. HRMS (ESI-TOF) *m/z*: [M + H]<sup>+</sup> Calcd for C<sub>40</sub>H<sub>37</sub>N<sub>2</sub>O<sub>4</sub> 609.2748; Found 609.2761. [α]<sub>D</sub><sup>26</sup> = -76.0 (*c* = 0.33, chloroform). The product was analyzed by HPLC to determine the enantiomeric excess: >98% ee (AD-H, hexane/*i*-PrOH = 80/20, detector: 254 nm, flow rate: 0.8 mL/min), t<sub>1</sub>(major) = 7.1 min, t<sub>2</sub>(minor) = 8.8 min.

**1,1'-(2,2'-bis(pyridin-2-yloxy)-(R)-[1,1'-binaphthalene]-3,3'-diyl)bis(hexan-3-one) (3ac)**

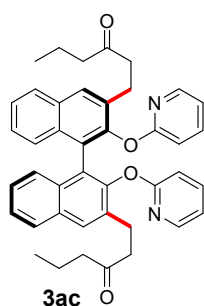

51.5 mg, 81% yield; colorless oil; eluent (petroleum ether/ethyl acetate = 5:1). <sup>1</sup>H NMR (400 MHz, CDCl<sub>3</sub>) δ 7.62 (d, *J* = 3.6 Hz, 2H), 7.57 (d, *J* = 8.2 Hz, 1H), 7.18 – 7.06 (m, 2H), 7.00 (d, *J* = 8.4 Hz, 1H), 6.97 – 6.90 (m, 1H), 6.41 (dd, *J* = 7.1, 5.0 Hz, 1H), 6.29 (d, *J* = 8.3 Hz, 1H), 2.92 (t, *J* = 7.6 Hz, 2H), 2.82 – 2.61 (m, 2H), 2.25 (td, *J* = 7.3, 3.4 Hz, 2H), 1.47 (h, *J* = 7.4 Hz, 2H), 0.77 (t, *J* = 7.4 Hz, 3H). <sup>13</sup>C NMR (100 MHz, CDCl<sub>3</sub>) δ 210.4, 163.3, 149.6, 147.0, 138.4, 133.9, 132.4, 131.2, 129.0, 127.1, 126.7, 125.1, 125.0, 125.0, 117.5, 110.6, 44.8, 42.9, 25.9, 17.3, 13.8. HRMS (ESI-TOF) *m/z*: [M + H]<sup>+</sup> Calcd for C<sub>42</sub>H<sub>41</sub>N<sub>2</sub>O<sub>4</sub> 637.3066; Found 637.3078.

[α]<sub>D</sub><sup>25</sup> = -95.0 (c = 1.81, chloroform). The product was analyzed by HPLC to determine the enantiomeric excess: >98% ee (AD-H, hexane/*i*-PrOH = 90/10, detector: 254 nm, flow rate: 0.8 mL/min), t<sub>1</sub>(major) = 12.5 min, t<sub>2</sub>(minor) = 14.9 min.

**1,1'-(2,2'-bis(pyridin-2-yloxy)-(R)-[1,1'-binaphthalene]-3,3'-diyl)bis(octan-3-one) (3ad)**

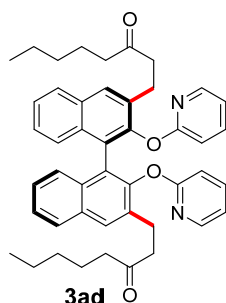

51.9 mg, 75% yield; colorless oil; eluent (petroleum ether/ethyl acetate = 8:1). <sup>1</sup>H NMR (400 MHz, CDCl<sub>3</sub>) δ 7.63 (d, *J* = 4.0 Hz, 2H), 7.58 (d, *J* = 8.2 Hz, 1H), 7.19 – 7.08 (m, 2H), 6.98 (dt, *J* = 15.0, 8.4 Hz, 2H), 6.43 (dd, *J* = 7.1, 4.9 Hz, 1H), 6.30 (d, *J* = 8.2 Hz, 1H), 2.93 (t, *J* = 7.7 Hz, 2H), 2.83 – 2.64 (m, 2H), 2.27 (td, *J* = 7.4, 3.9 Hz, 2H), 1.45 (p, *J* = 7.4 Hz, 2H), 1.16 (dp, *J* = 15.2, 6.4, 5.2 Hz, 4H), 0.77 (t, *J* = 7.0 Hz, 3H). <sup>13</sup>C NMR (100 MHz, CDCl<sub>3</sub>) δ 209.6, 162.2, 148.6, 145.9, 137.3, 132.9, 131.3, 130.2, 128.0, 126.1, 125.6, 124.0, 124.0, 123.9, 116.4, 109.5, 41.8, 41.8, 30.4, 24.8, 22.5, 21.4, 12.9. HRMS (ESI-TOF) *m/z*: [M + H]<sup>+</sup>

Calcd for C<sub>46</sub>H<sub>49</sub>N<sub>2</sub>O<sub>4</sub> 693.3687; Found 693.3692. [α]<sub>D</sub><sup>26</sup> = -28.6 (c = 0.21, chloroform). The product was analyzed by HPLC to determine the enantiomeric excess: >99% ee (AD-H, hexane/*i*-PrOH = 90/10, detector: 220 nm, flow rate: 0.8 mL/min), t<sub>1</sub>(major) = 10.6 min, t<sub>2</sub>(minor) = 20.7 min.

**5,5'-(2,2'-bis(pyridin-2-yloxy)-(R)-[1,1'-binaphthalene]-3,3'-diyl)bis(1-phenylpentan-3-one) (3ae)**

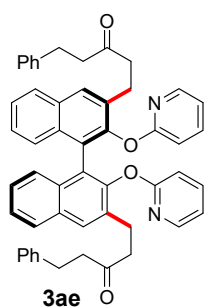

70.7 mg, 93% yield; colorless oil; eluent (petroleum ether/ethyl acetate = 8:1). <sup>1</sup>H NMR (400 MHz, CDCl<sub>3</sub>) δ 7.51 – 7.40 (m, 3H), 7.07 – 6.99 (m, 3H), 6.99 – 6.88 (m, 4H), 6.88 – 6.78 (m, 2H), 6.27 (dd, *J* = 7.1, 5.0 Hz, 1H), 6.13 (d, *J* = 8.3 Hz, 1H), 2.80 (t, *J* = 7.6 Hz, 2H), 2.63 (dt, *J* = 14.4, 7.7 Hz, 3H), 2.58 – 2.51 (m, 1H), 2.47 (td, *J* = 8.4, 7.7, 5.9 Hz, 2H). <sup>13</sup>C NMR (100 MHz, CDCl<sub>3</sub>) δ 209.4, 163.3, 149.6, 147.0, 141.1, 138.4, 133.8, 132.4, 131.2, 129.1, 128.5, 128.3, 127.1, 126.7, 126.1, 125.1, 125.1, 125.0, 117.5, 110.6, 44.4, 43.0, 29.7, 25.9. HRMS (ESI-TOF) *m/z*: [M + H]<sup>+</sup> Calcd for C<sub>52</sub>H<sub>45</sub>N<sub>2</sub>O<sub>4</sub> 761.3374; Found 761.3375. [α]<sub>D</sub><sup>26</sup> = -75.4 (c =

0.27, chloroform). The product was analyzed by HPLC to determine the enantiomeric excess: >99% ee (AD-H, hexane/*i*-PrOH = 90/10, detector: 220 nm, flow rate: 0.8 mL/min), t<sub>1</sub>(major) = 9.6 min, t<sub>2</sub>(minor) = 11.5 min.

**5,5'-(2,2'-bis(pyridin-2-yloxy)-(R)-[1,1'-binaphthalene]-3,3'-diyl)bis(2-methylpentan-3-one) (3af)**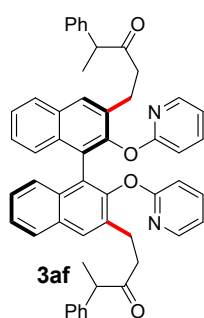

10.6 mg, 14% yield; colorless oil; eluent (petroleum ether/ethyl acetate = 5:1). <sup>1</sup>H NMR (400 MHz, CDCl<sub>3</sub>) δ 7.58 – 7.44 (m, 3H), 7.23 – 7.10 (m, 4H), 7.07 (d, *J* = 7.3 Hz, 2H), 7.03 – 6.96 (m, 1H), 6.93 (d, *J* = 5.9 Hz, 2H), 6.41 – 6.32 (m, 1H), 6.14 (dt, *J* = 12.0, 7.7 Hz, 1H), 3.65 (p, *J* = 6.9 Hz, 1H), 2.96 – 2.56 (m, 4H), 1.28 (dd, *J* = 7.0, 4.5 Hz, 3H). <sup>13</sup>C NMR (100 MHz, CDCl<sub>3</sub>) δ 210.2, 210.1, 163.2, 149.6, 149.6, 146.8, 140.6, 140.6, 138.2, 138.2, 138.2, 133.8, 133.7, 132.3, 131.1, 128.9, 128.8, 128.8, 127.9, 127.8, 127.1, 127.1, 127.0, 127.0, 126.6, 124.9, 124.8, 117.3, 110.6, 52.9, 41.4, 41.3, 25.9, 25.8, 17.5, 17.4. HRMS (ESI-TOF) *m/z*: [M + H]<sup>+</sup>

Calcd for C<sub>52</sub>H<sub>45</sub>N<sub>2</sub>O<sub>4</sub> 761.3374; Found 761.3375.

**1-(2,2'-bis(pyridin-2-yloxy)-(R)-[1,1'-binaphthalen]-3-yl)-4-methylpentan-3-one (4af)**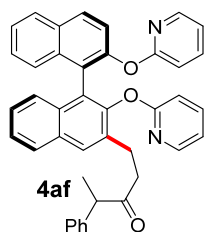

40.2 mg, 67% yield; colorless oil; eluent (petroleum ether/ethyl acetate = 8:1). <sup>1</sup>H NMR (400 MHz, CDCl<sub>3</sub>) δ 7.70 (td, *J* = 4.9, 1.9 Hz, 1H), 7.60 (d, *J* = 8.8 Hz, 1H), 7.55 – 7.46 (m, 2H), 7.46 – 7.38 (m, 2H), 7.17 – 6.86 (m, 14H), 6.51 (q, *J* = 5.8 Hz, 1H), 6.35 – 6.22 (m, 2H), 6.07 (dd, *J* = 11.4, 8.3 Hz, 1H), 3.48 (p, *J* = 7.0 Hz, 1H), 2.82 – 2.45 (m, 4H), 1.12 (t, *J* = 6.9 Hz, 3H). <sup>13</sup>C NMR (100 MHz, CDCl<sub>3</sub>) δ 210.2, 210.1, 163.4, 163.2, 163.2, 150.0, 145.0, 149.5, 147.1, 146.9, 140.5, 138.7, 138.7, 138.4, 138.4, 133.9, 133.8, 133.5, 133.5, 132.7, 131.4, 130.7, 129.3, 129.3, 129.0, 128.9, 128.9, 127.9, 127.9, 127.5, 127.4, 127.3, 127.1, 126.7, 126.2, 125.7, 125.7, 125.4, 125.1, 125.0, 124.7, 123.5, 121.5, 121.5, 118.0, 117.9, 117.4, 111.6, 111.6, 110.6, 110.6, 53.0, 52.9, 41.2, 41.2, 26.0, 25.9, 17.5, 17.4. HRMS (ESI-TOF) *m/z*: [M + H]<sup>+</sup> Calcd for C<sub>41</sub>H<sub>33</sub>N<sub>2</sub>O<sub>3</sub> 601.2486; Found 601.2491.

**3,3'-(2,2'-bis(pyridin-2-yloxy)-(R)-[1,1'-binaphthalene]-3,3'-diyl)bis(1-phenylpropan-1-one) (3ag)**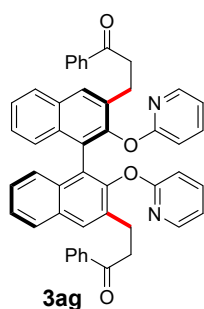

14.8 mg, 21% yield; colorless oil; eluent (petroleum ether/ethyl acetate = 5:1). <sup>1</sup>H NMR (400 MHz, CDCl<sub>3</sub>) δ 7.96 – 7.83 (m, 2H), 7.76 (s, 1H), 7.65 (t, *J* = 5.8 Hz, 2H), 7.49 (t, *J* = 7.3 Hz, 1H), 7.38 (t, *J* = 7.6 Hz, 2H), 7.22 (d, *J* = 4.2 Hz, 2H), 7.11 – 6.98 (m, 2H), 6.43 (dd, *J* = 7.1, 4.7 Hz, 1H), 6.33 (d, *J* = 8.3 Hz, 1H), 3.46 – 3.25 (m, 2H), 3.15 (dq, *J* = 14.4, 7.3, 6.5 Hz, 2H). <sup>13</sup>C NMR (100 MHz, CDCl<sub>3</sub>) δ 199.6, 163.3, 149.8, 147.0, 138.3, 136.9, 134.0, 133.0, 132.4, 131.2, 129.3, 128.6, 128.1, 127.1, 126.7, 125.0, 124.9, 117.4, 110.6, 39.2, 26.5. HRMS (ESI-TOF) *m/z*: [M + H]<sup>+</sup> Calcd for C<sub>48</sub>H<sub>37</sub>N<sub>2</sub>O<sub>4</sub> 705.2748; Found 705.2750. [α]<sub>D</sub><sup>26</sup> = -3.0 (c = 0.76,

chloroform). The product was analyzed by HPLC to determine the enantiomeric excess: >99% ee (AD-H, hexane/*i*-PrOH = 90/10, detector: 220 nm, flow rate: 0.8 mL/min), *t*<sub>1</sub>(major) = 13.6 min, *t*<sub>2</sub>(minor) = 14.9 min.

**3-(2,2'-bis(pyridin-2-yloxy)-(R)-[1,1'-binaphthalen]-3-yl)-1-phenylpropan-1-one (4ag)**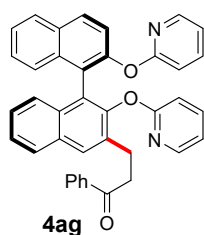

22.9 mg, 40% yield; colorless oil; eluent (petroleum ether/ethyl acetate = 8:1). <sup>1</sup>H NMR (400 MHz, CDCl<sub>3</sub>) δ 7.93 – 7.82 (m, 4H), 7.81 – 7.62 (m, 4H), 7.51 – 7.44 (m, 1H), 7.39 – 7.22 (m, 6H), 7.20 – 7.03 (m, 5H), 6.68 (dd, *J* = 7.1, 5.0 Hz, 1H), 6.52 – 6.43 (m, 2H), 6.33 (d, *J* = 8.3 Hz, 1H), 3.42 – 3.23 (m, 2H), 3.11 (t, *J* = 8.1 Hz, 2H). <sup>13</sup>C NMR (100 MHz, CDCl<sub>3</sub>) δ 199.6, 163.3, 150.0, 149.7, 138.9, 138.6, 136.8, 134.1, 133.5, 133.0, 132.8, 131.5, 130.8, 129.5, 128.5, 128.2, 127.6, 127.5, 126.8, 126.2, 125.8, 125.6, 125.2, 124.8, 123.5, 121.7, 118.0, 117.6, 111.7, 110.7, 39.1, 26.5. HRMS

(ESI-TOF)  $m/z$ :  $[M + H]^+$  Calcd for  $C_{39}H_{29}N_2O_3$  573.2173; Found 573.2178.  $[\alpha]_D^{26} = 2.0$  ( $c = 0.15$ , chloroform). The product was analyzed by HPLC to determine the enantiomeric excess: >99% ee (AD-H, hexane/*i*-PrOH = 90/10, detector: 280 nm, flow rate: 0.8 mL/min),  $t_1$ (minor) = 16.8 min,  $t_2$ (major) = 24.7 min.

**3,3'-(2,2'-bis(pyridin-2-yloxy)-(R)-[1,1'-binaphthalene]-3,3'-diyl)bis(1-(thiophen-2-yl)propan-1-**

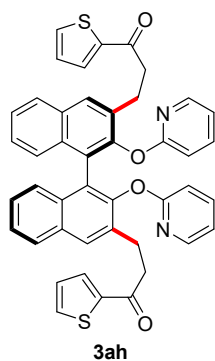

**3ah**

**one (3ah)** 10.7 mg, 15% yield; colorless oil; eluent (petroleum ether/ethyl acetate = 5:1).  $^1H$  NMR (400 MHz,  $CDCl_3$ )  $\delta$  7.79 (s, 1H), 7.67 (dd,  $J = 6.2, 3.2$  Hz, 3H), 7.60 (dd,  $J = 4.9, 1.1$  Hz, 1H), 7.26 – 7.21 (m, 1H), 7.17 – 7.00 (m, 4H), 6.47 (dd,  $J = 7.2, 4.9$  Hz, 1H), 6.36 (d,  $J = 8.2$  Hz, 1H), 3.41 – 3.27 (m, 2H), 3.27 – 3.13 (m, 2H).  $^{13}C$  NMR (100 MHz,  $CDCl_3$ )  $\delta$  192.5, 163.2, 149.8, 146.8, 144.3, 138.6, 133.6, 133.5, 132.4, 132.1, 131.2, 129.5, 128.1, 127.2, 126.7, 125.1, 125.0, 117.5, 110.8, 39.7, 26.7. HRMS (ESI-TOF)  $m/z$ :  $[M + H]^+$  Calcd for  $C_{44}H_{33}N_2O_4S_2$  717.1876; Found 717.1880.  $[\alpha]_D^{26} = -5.9$  ( $c = 0.57$ , chloroform). The product was analyzed by HPLC to determine the enantiomeric excess: >98% ee (AD-H,

hexane/*i*-PrOH = 80/20, detector: 280 nm, flow rate: 0.8 mL/min),  $t_1$ (minor) = 15.4 min,  $t_2$ (major) = 16.9 min.

**3-(2,2'-bis(pyridin-2-yloxy)-(R)-[1,1'-binaphthalen]-3-yl)-1-(thiophen-2-yl)propan-1-one (4ah)**

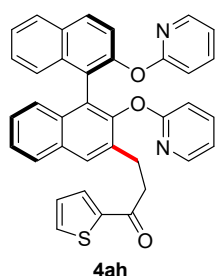

**4ah**

23.1 mg, 40% yield; colorless oil; eluent (petroleum ether/ethyl acetate = 8:1).  $^1H$  NMR (400 MHz,  $CDCl_3$ )  $\delta$  7.94 – 7.84 (m, 1H), 7.84 – 7.59 (m, 5H), 7.53 (dd,  $J = 12.4, 4.3$  Hz, 2H), 7.30 (dd,  $J = 11.5, 5.2$  Hz, 2H), 7.23 (d,  $J = 8.2$  Hz, 1H), 7.21 – 7.03 (m, 6H), 6.98 (t,  $J = 4.3$  Hz, 1H), 6.67 (t,  $J = 5.6$  Hz, 1H), 6.46 (t,  $J = 7.3$  Hz, 2H), 6.32 (d,  $J = 8.2$  Hz, 1H), 3.23 (q,  $J = 8.0$  Hz, 2H), 3.10 (t,  $J = 7.5$  Hz, 2H).  $^{13}C$  NMR (100 MHz,  $CDCl_3$ )  $\delta$  192.6, 163.4, 163.3, 150.0, 149.7, 147.1, 147.0, 144.3, 138.8, 138.6, 133.8, 133.5, 133.5, 132.8, 132.0, 131.5, 130.8, 129.5, 129.4, 128.0, 127.6, 127.5, 126.8, 126.3, 125.8, 125.6, 125.2, 125.1, 124.8, 123.5, 121.6,

118.0, 117.5, 111.7, 110.7, 39.7, 26.8. HRMS (ESI-TOF)  $m/z$ :  $[M + H]^+$  Calcd for  $C_{37}H_{27}N_2O_3S$  579.1737; Found 579.1740.  $[\alpha]_D^{26} = -0.6$  ( $c = 0.33$ , chloroform). The product was analyzed by HPLC to determine the enantiomeric excess: >99% ee (AD-H, hexane/*i*-PrOH = 90/10, detector: 280 nm, flow rate: 0.8 mL/min),  $t_1$ (minor) = 19.8 min,  $t_2$ (major) = 26.3 min.

**4,4'-(2,2'-bis(pyridin-2-yloxy)-(R)-[1,1'-binaphthalene]-3,3'-diyl)bis(2-methylbutan-2-ol) (5)**

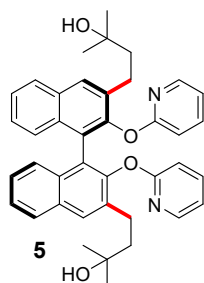

**5**

25.1 mg, 82% yield; colorless oil; eluent (petroleum ether/ethyl acetate = 1:1).  $^1H$  NMR (400 MHz,  $CDCl_3$ )  $\delta$  7.63 (d,  $J = 5.9$  Hz, 2H), 7.57 (d,  $J = 8.2$  Hz, 1H), 7.15 (d,  $J = 7.2$  Hz, 1H), 7.10 (ddd,  $J = 10.2, 5.8, 1.8$  Hz, 1H), 7.00 (d,  $J = 8.4$  Hz, 1H), 6.93 (ddd,  $J = 8.3, 6.7, 1.2$  Hz, 1H), 6.42 (dd,  $J = 7.1, 5.0$  Hz, 1H), 6.29 (d,  $J = 8.3$  Hz, 1H), 2.69 (t,  $J = 8.4$  Hz, 2H), 1.83 (dt,  $J = 13.6, 7.9$  Hz, 1H), 1.72 (dt,  $J = 13.6, 8.2$  Hz, 1H), 1.08 (d,  $J = 5.2$  Hz, 6H).  $^{13}C$  NMR (100 MHz,  $CDCl_3$ )  $\delta$  163.3, 149.6, 146.9, 138.4, 135.3, 132.2, 131.3, 128.7, 127.0, 126.7, 125.1, 124.9, 117.4, 110.6, 70.9, 44.0, 29.2, 29.1, 26.4. HRMS (ESI-TOF)  $m/z$ :  $[M + H]^+$  Calcd for  $C_{40}H_{41}N_2O_4$

613.3061; Found 613.3066.  $[\alpha]_D^{26} = -35.4$  ( $c = 0.26$ , chloroform). The product was analyzed by HPLC to determine the enantiomeric excess: >99% ee (AD-H, hexane/*i*-PrOH = 90/10, detector: 220 nm, flow rate: 0.8 mL/min),  $t_1$ (minor) = 24.5 min,  $t_2$ (major) = 27.4 min.

**2,2'-((3,3'-bis(3-methylbut-3-en-1-yl)-(R)-[1,1'-binaphthalene]-2,2'-diyl)bis(oxy))dipyridine (6)**

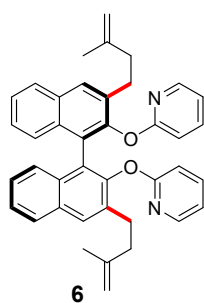

23.3 mg, 81% yield; colorless oil; eluent (petroleum ether/ethyl acetate = 20:1). <sup>1</sup>H NMR (400 MHz, CDCl<sub>3</sub>) δ 7.67 (d, *J* = 5.1 Hz, 2H), 7.62 (d, *J* = 8.2 Hz, 1H), 7.22 – 7.11 (m, 2H), 7.06 (d, *J* = 8.4 Hz, 1H), 6.97 (ddd, *J* = 8.2, 6.6, 1.2 Hz, 1H), 6.45 (dd, *J* = 7.1, 5.0 Hz, 1H), 6.35 (d, *J* = 8.2 Hz, 1H), 4.62 (d, *J* = 5.8 Hz, 2H), 2.77 (tt, *J* = 14.2, 7.2 Hz, 2H), 2.34 (dddd, *J* = 41.5, 14.9, 9.8, 6.2 Hz, 2H), 1.65 (s, 3H). <sup>13</sup>C NMR (151 MHz, CDCl<sub>3</sub>) δ 163.4, 149.6, 146.9, 145.6, 138.2, 134.9, 132.3, 131.3, 128.5, 127.0, 126.7, 125.1, 124.8, 117.2, 110.6, 110.1, 38.0, 29.9, 22.5. HRMS (ESI-TOF) *m/z*: [M + H]<sup>+</sup> Calcd for C<sub>40</sub>H<sub>37</sub>N<sub>2</sub>O<sub>2</sub> 577.2850; Found 577.2850. [α]<sub>D</sub><sup>26</sup> = -65.4 (*c* = 0.57, chloroform). The product was analyzed by HPLC to determine the enantiomeric excess: >99% ee (AD-H, hexane/*i*-PrOH = 35/1, detector: 220 nm, flow rate: 0.8 mL/min), t<sub>1</sub>(major) = 8.1 min, t<sub>2</sub>(minor) = 8.7 min.

**4,4'-(2,2'-dihydroxy-(R)-[1,1'-binaphthalene]-3,3'-diyl)bis(butan-2-one) (7)**

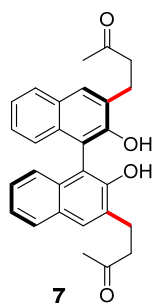

15.5 mg, 73% yield; colorless oil; eluent (petroleum ether/ethyl acetate = 4:1). <sup>1</sup>H NMR (400 MHz, CDCl<sub>3</sub>) δ 7.86 – 7.77 (m, 2H), 7.34 (ddd, *J* = 8.0, 6.7, 1.3 Hz, 1H), 7.25 – 7.21 (m, 1H), 7.05 (d, *J* = 8.4 Hz, 1H), 5.52 (s, 1H), 3.16 (t, *J* = 7.4 Hz, 2H), 2.94 (t, *J* = 7.3 Hz, 2H), 2.19 (s, 3H). <sup>13</sup>C NMR (100 MHz, CDCl<sub>3</sub>) δ 208.8, 151.5, 132.4, 130.4, 129.7, 129.4, 127.8, 126.7, 124.1, 124.1, 111.7, 43.7, 30.0, 25.4. HRMS (ESI-TOF) *m/z*: [M + Na]<sup>+</sup> Calcd for C<sub>28</sub>H<sub>26</sub>NaO<sub>4</sub> 449.1723; Found 449.1729. [α]<sub>D</sub><sup>24</sup> = 21.5 (*c* = 0.22, chloroform). The product was analyzed by HPLC to determine the enantiomeric excess: >99% ee (AD-H, hexane/*i*-PrOH = 90/10, detector: 220 nm, flow rate: 0.8 mL/min), t<sub>1</sub>(minor) = 19.2 min, t<sub>2</sub>(major) = 32.5 min.

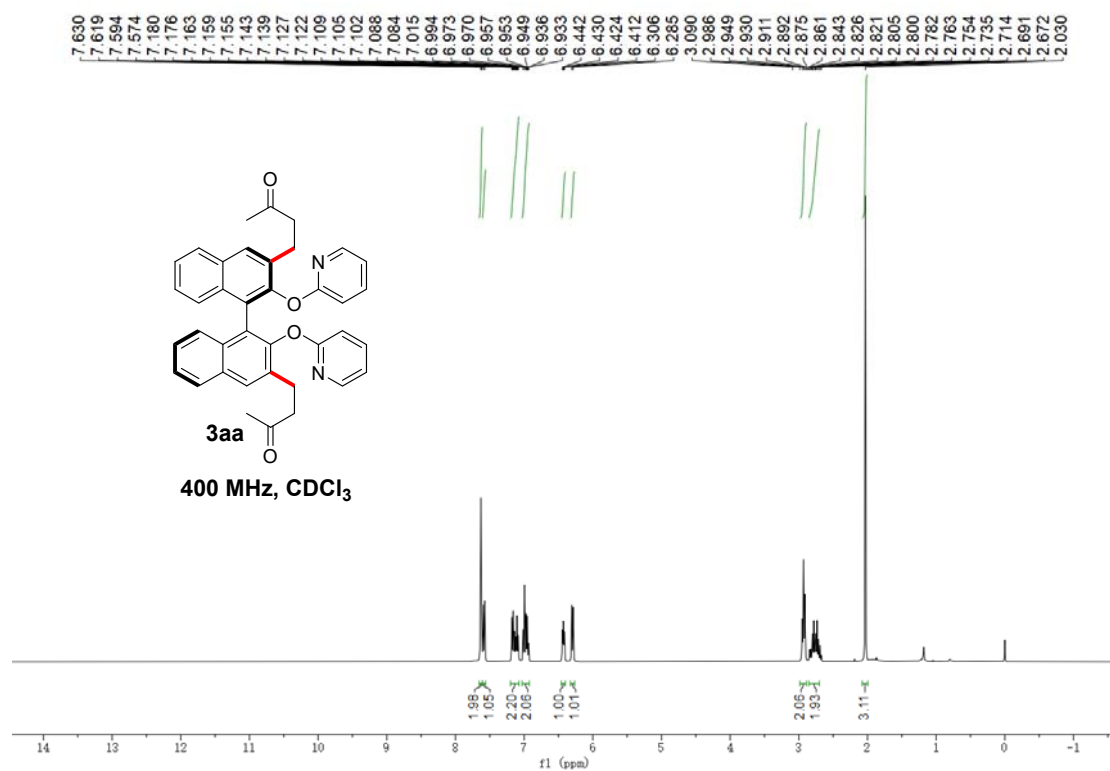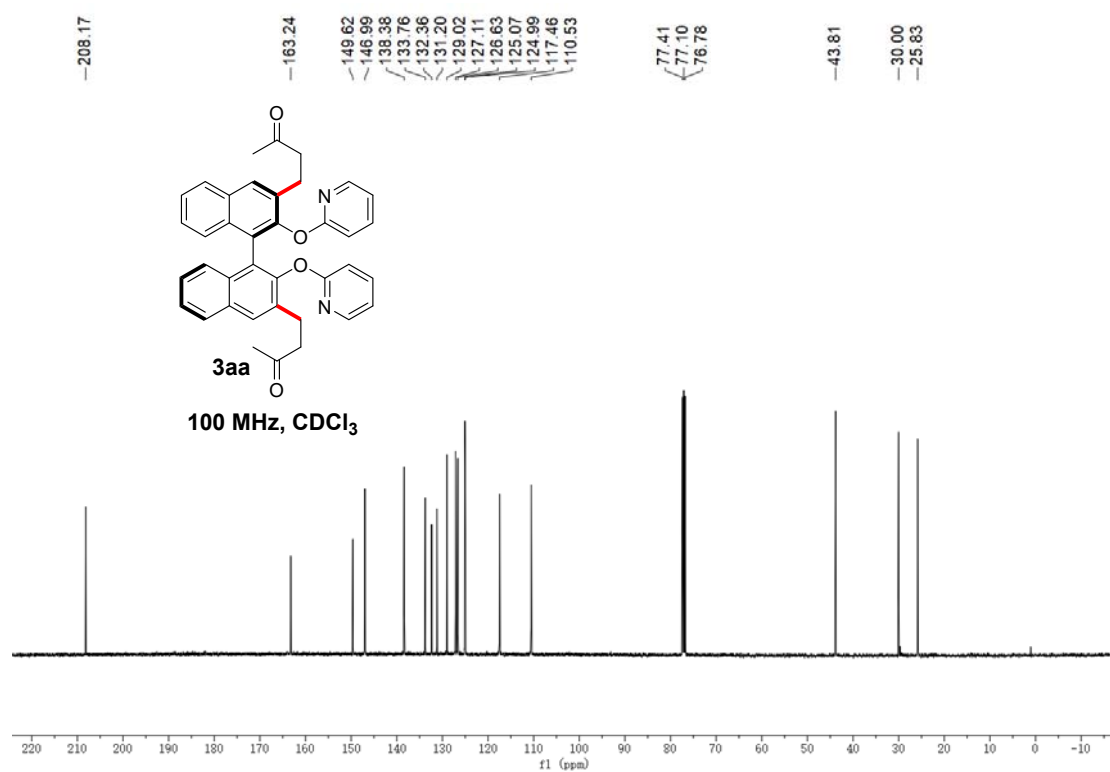



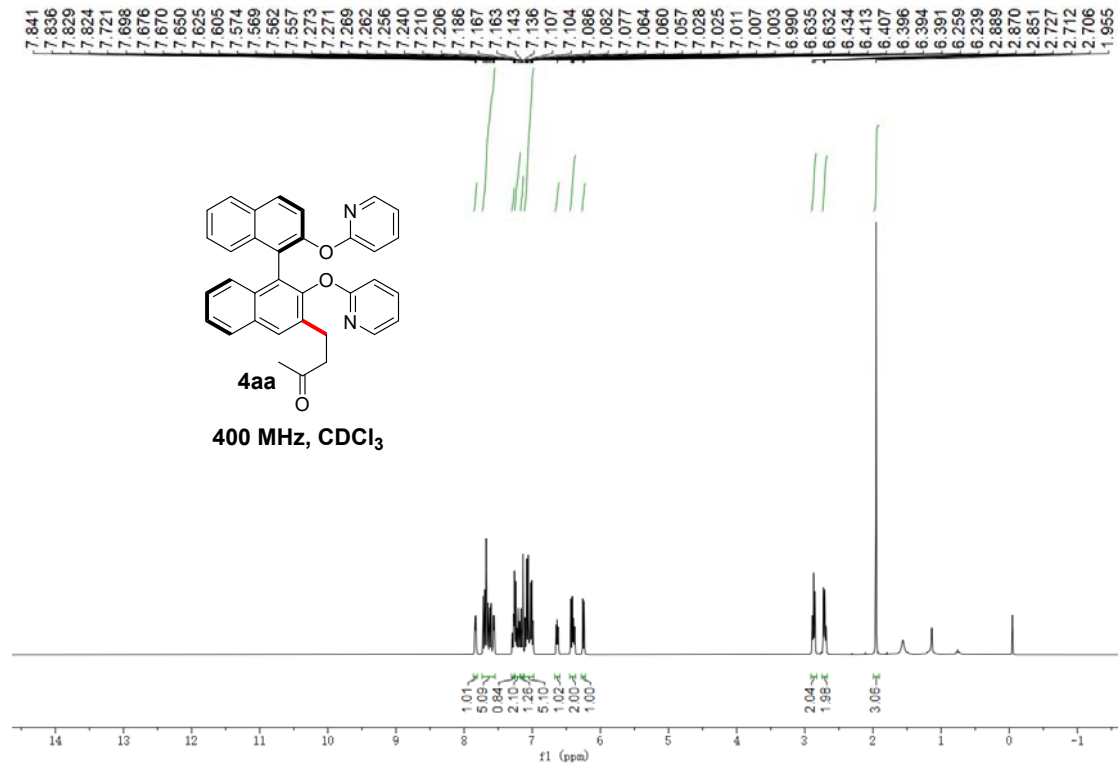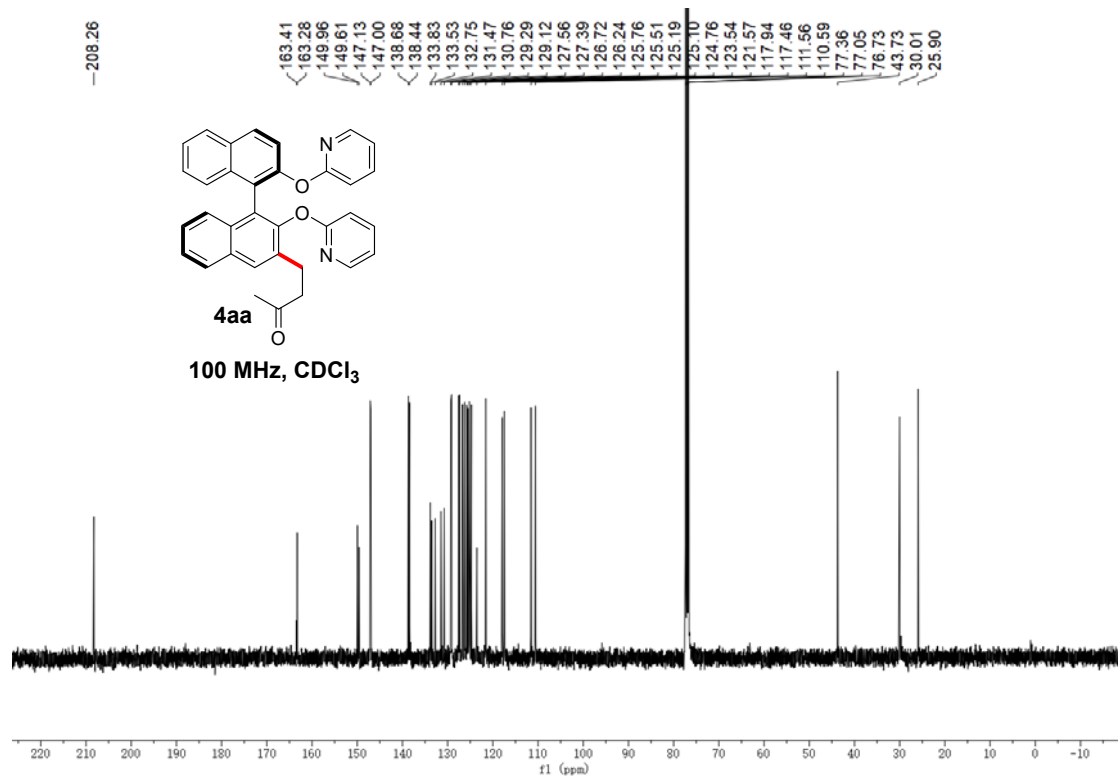



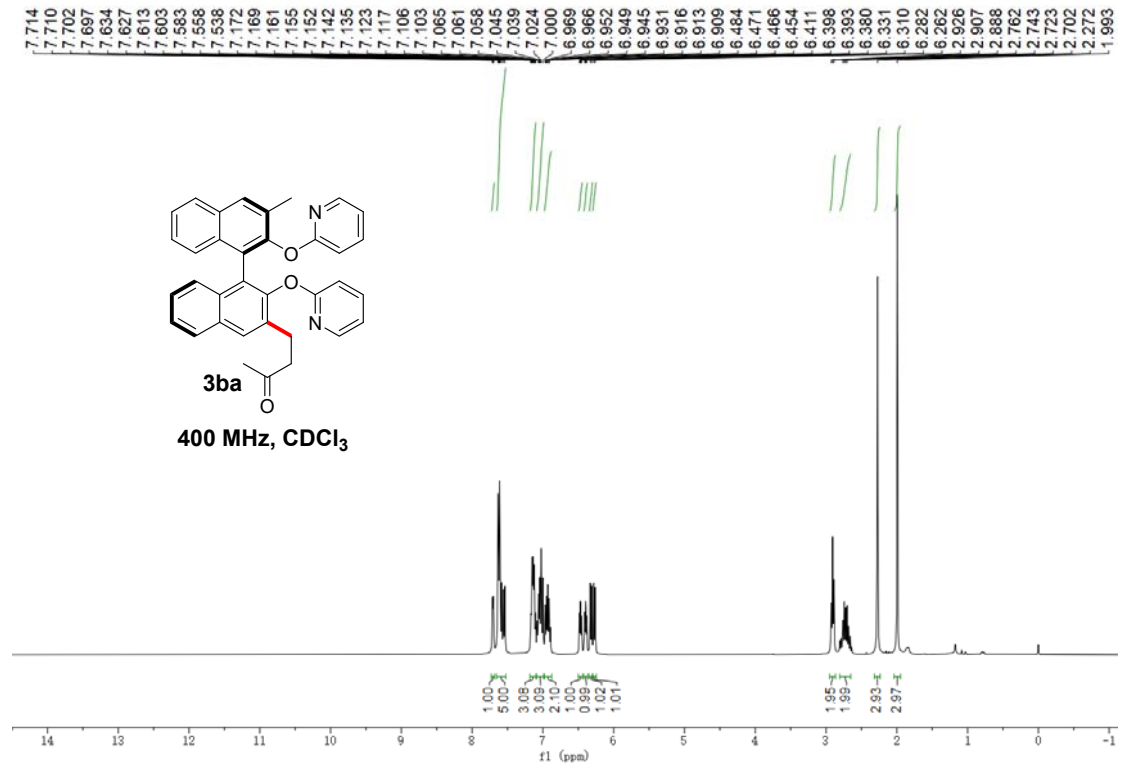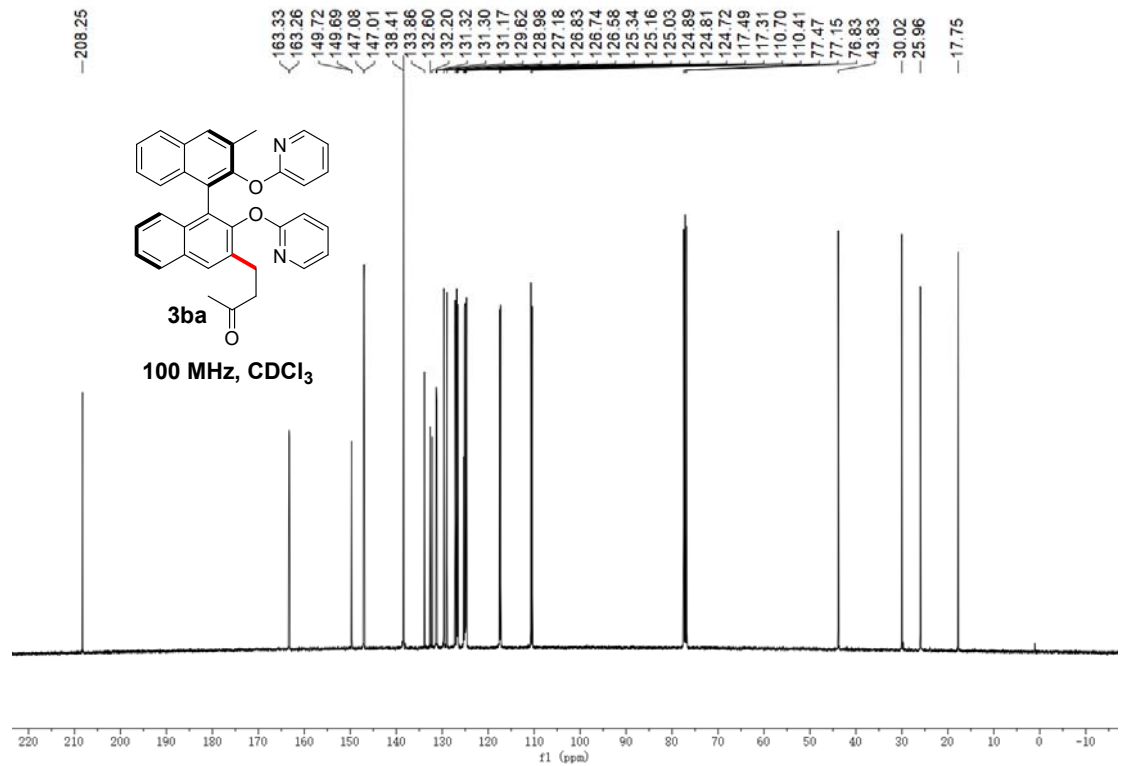

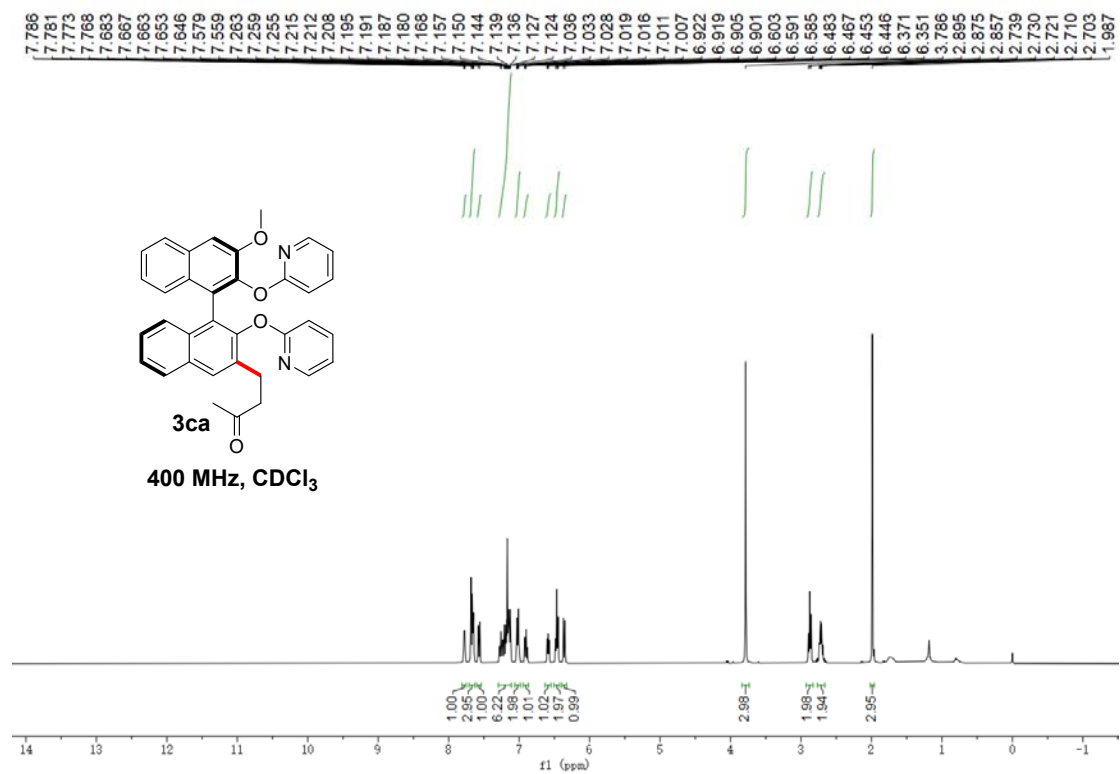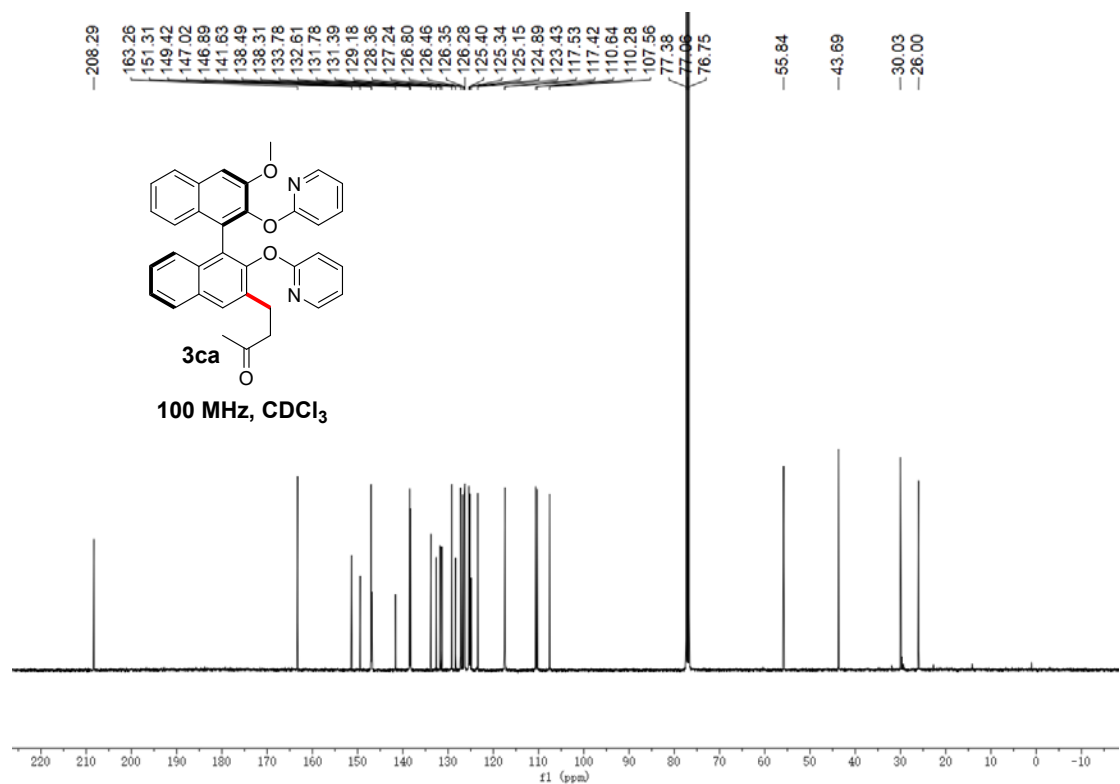

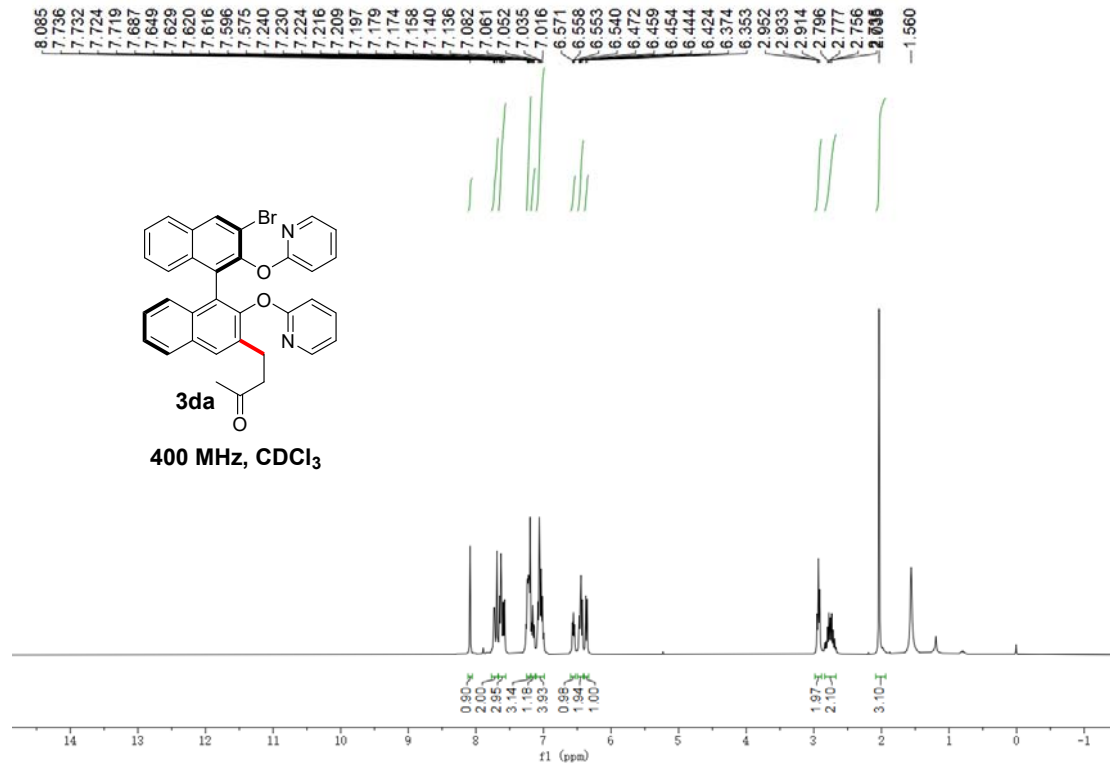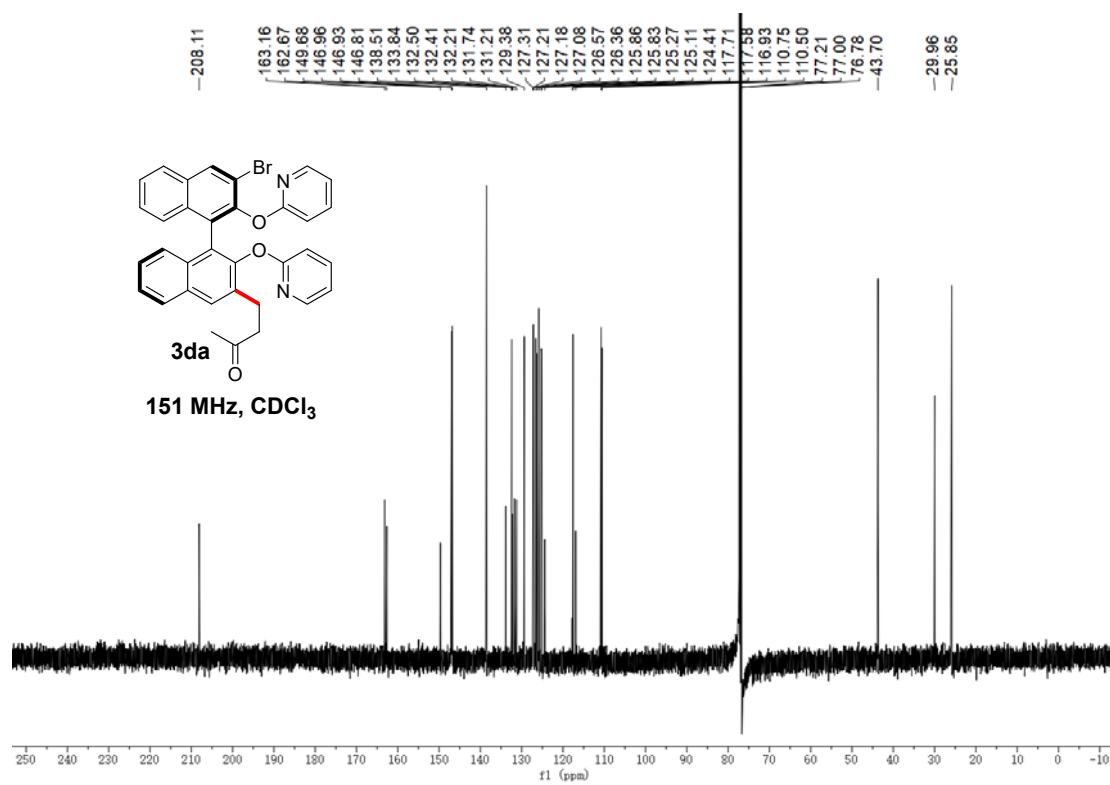

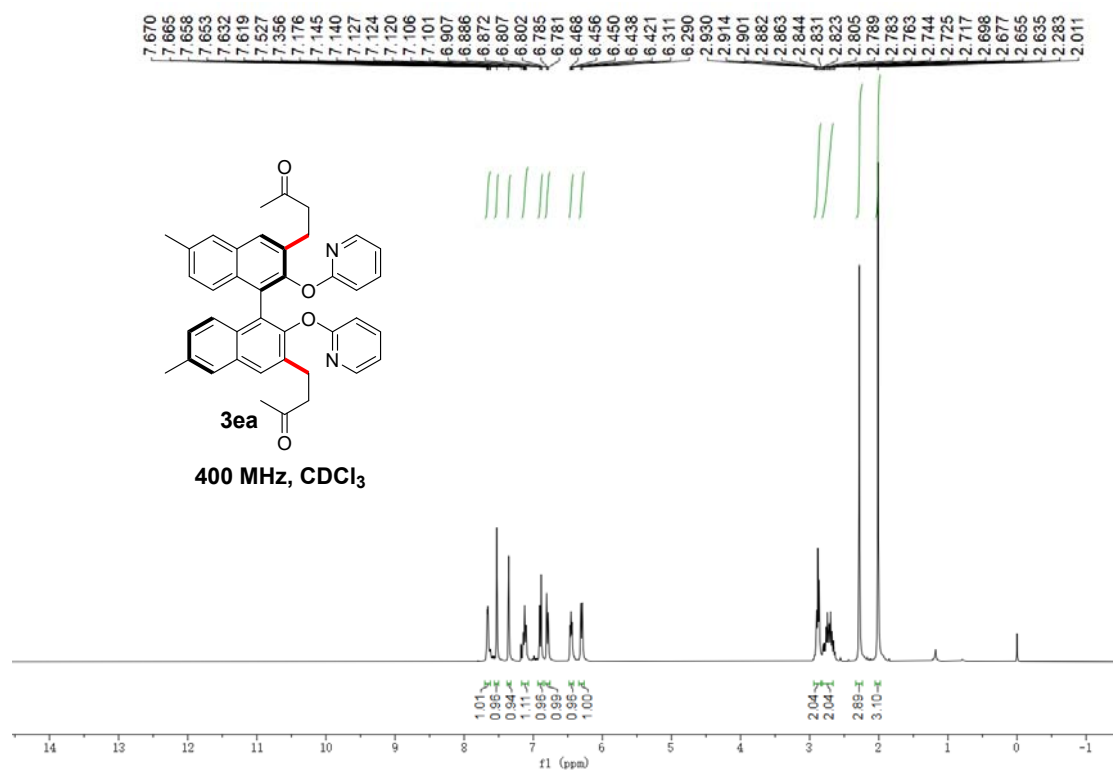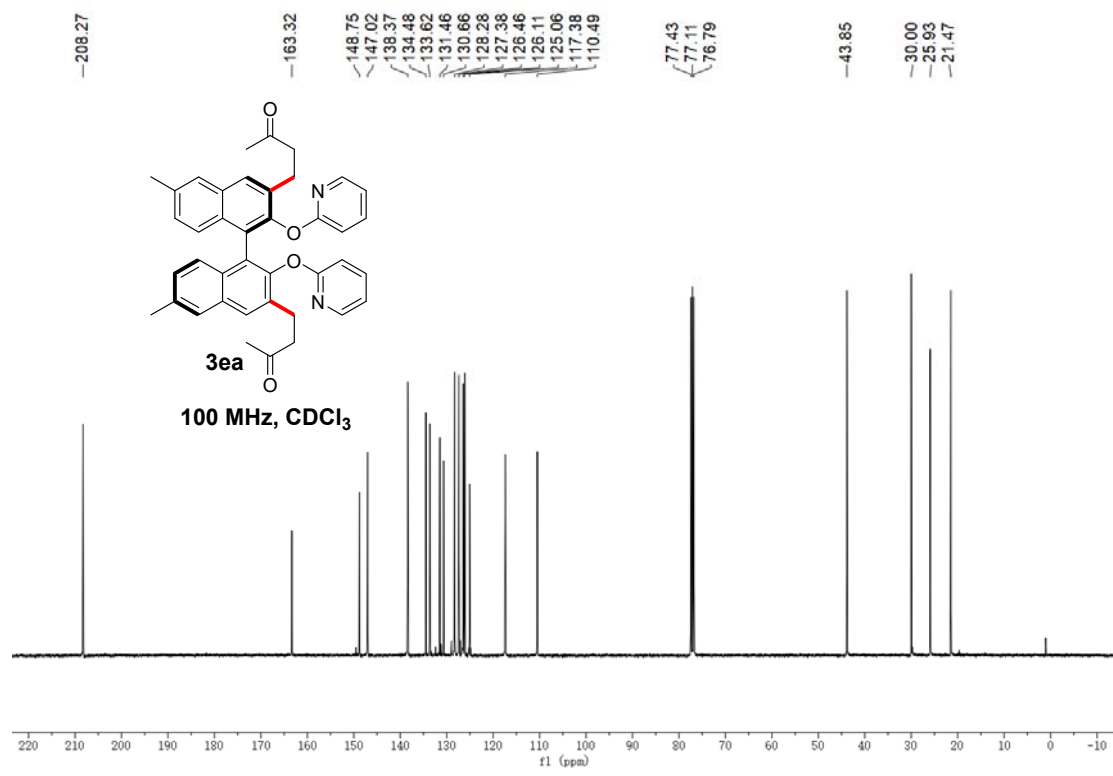

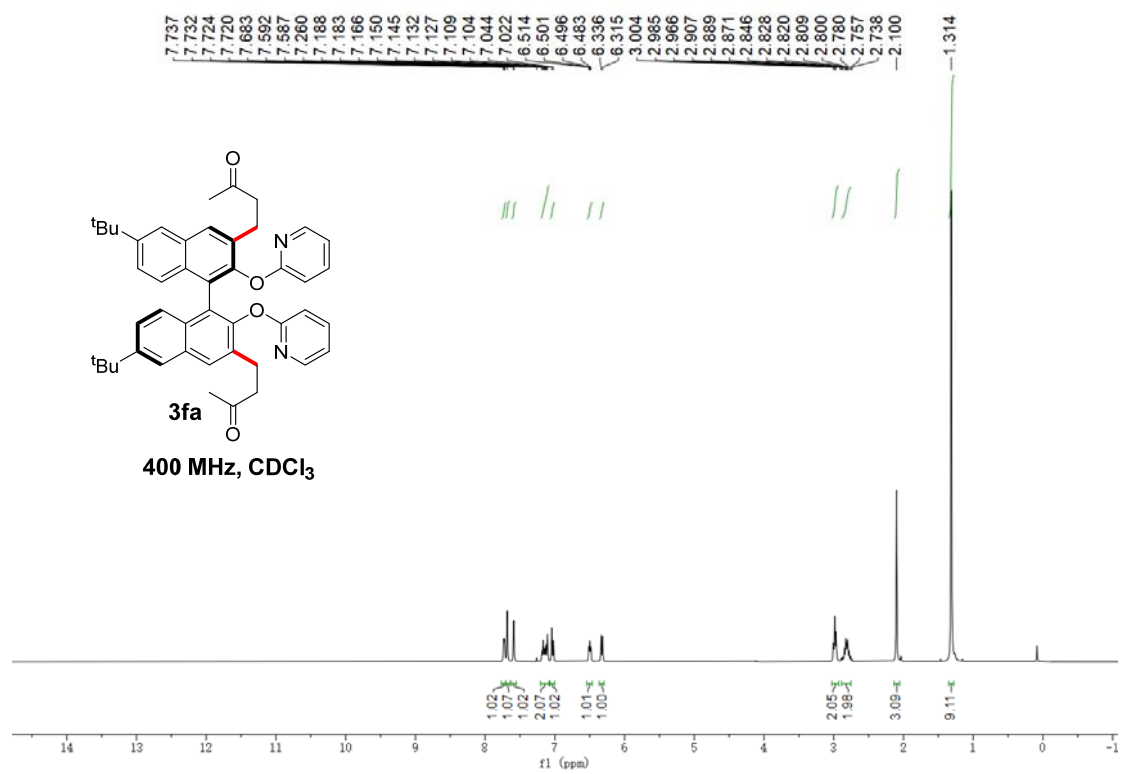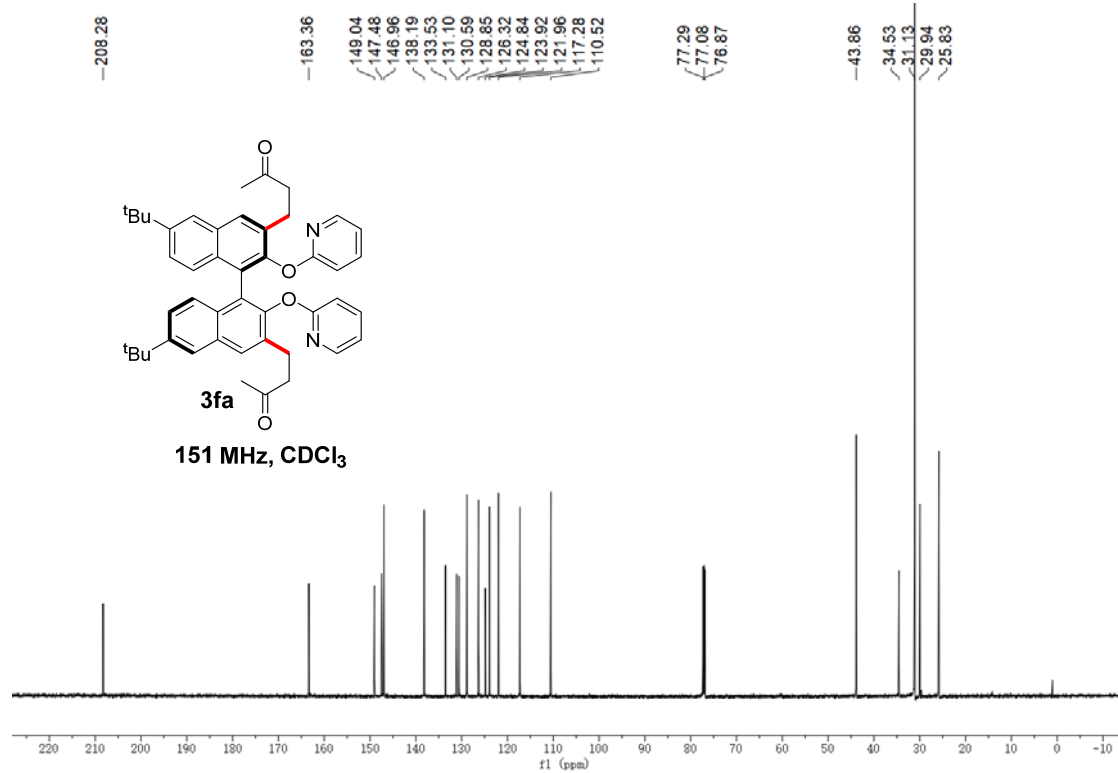

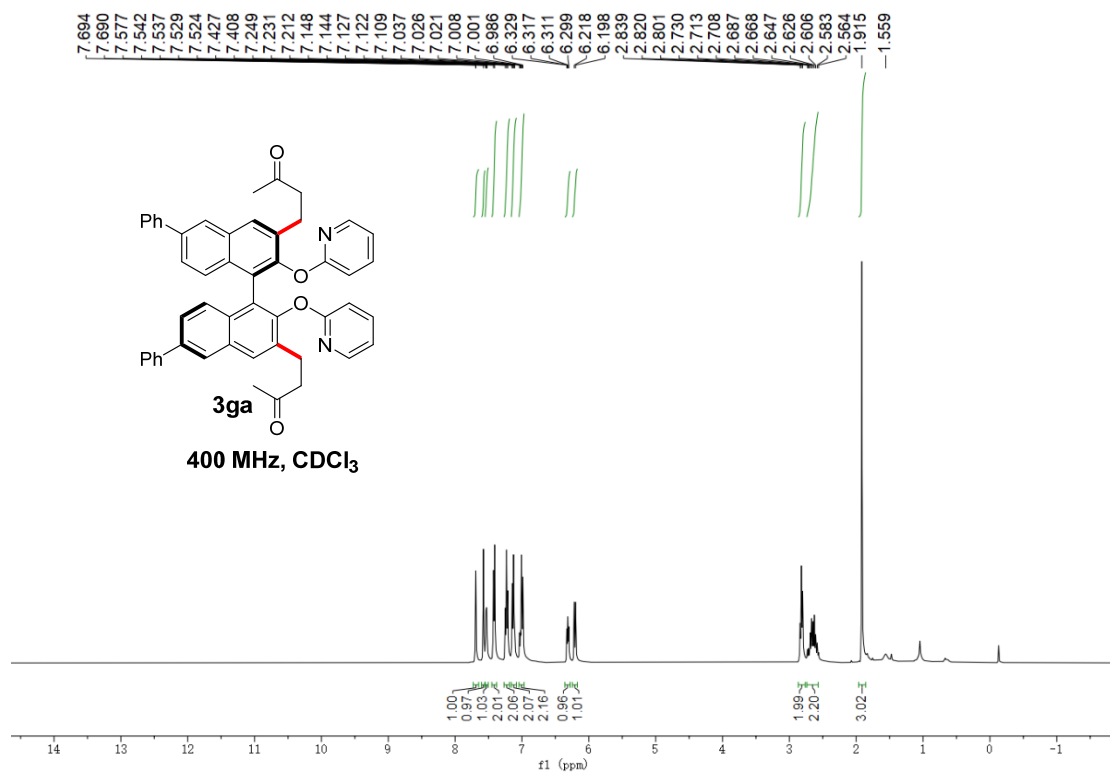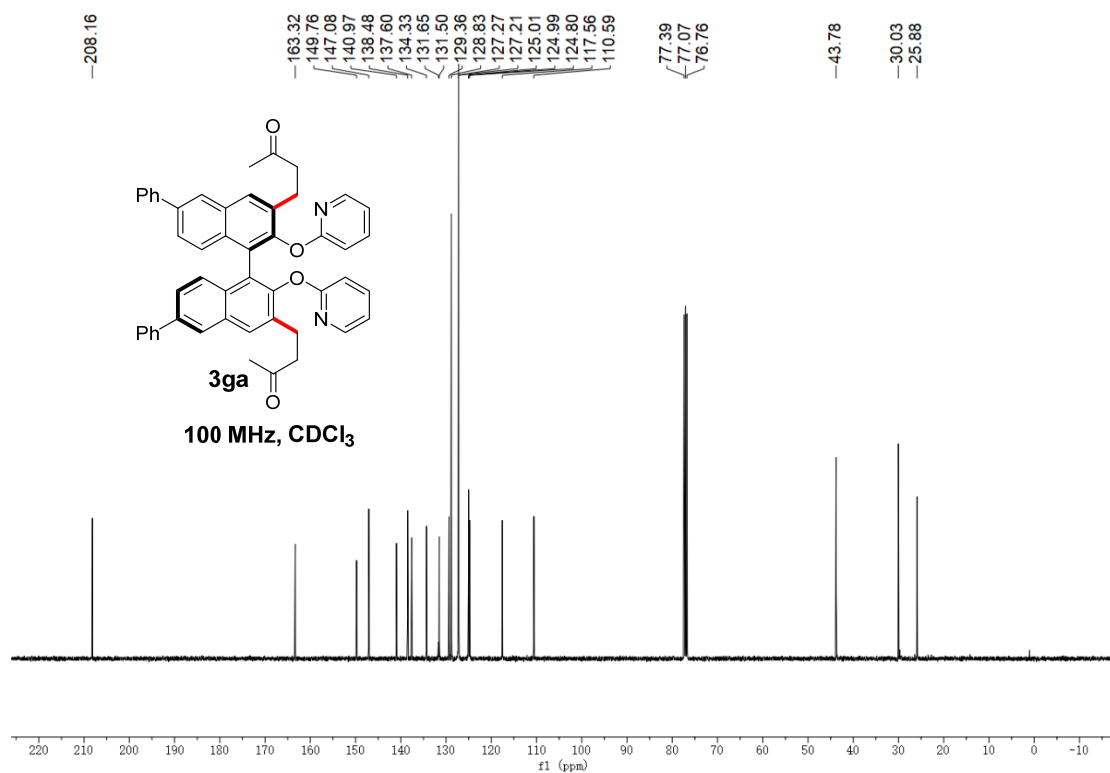

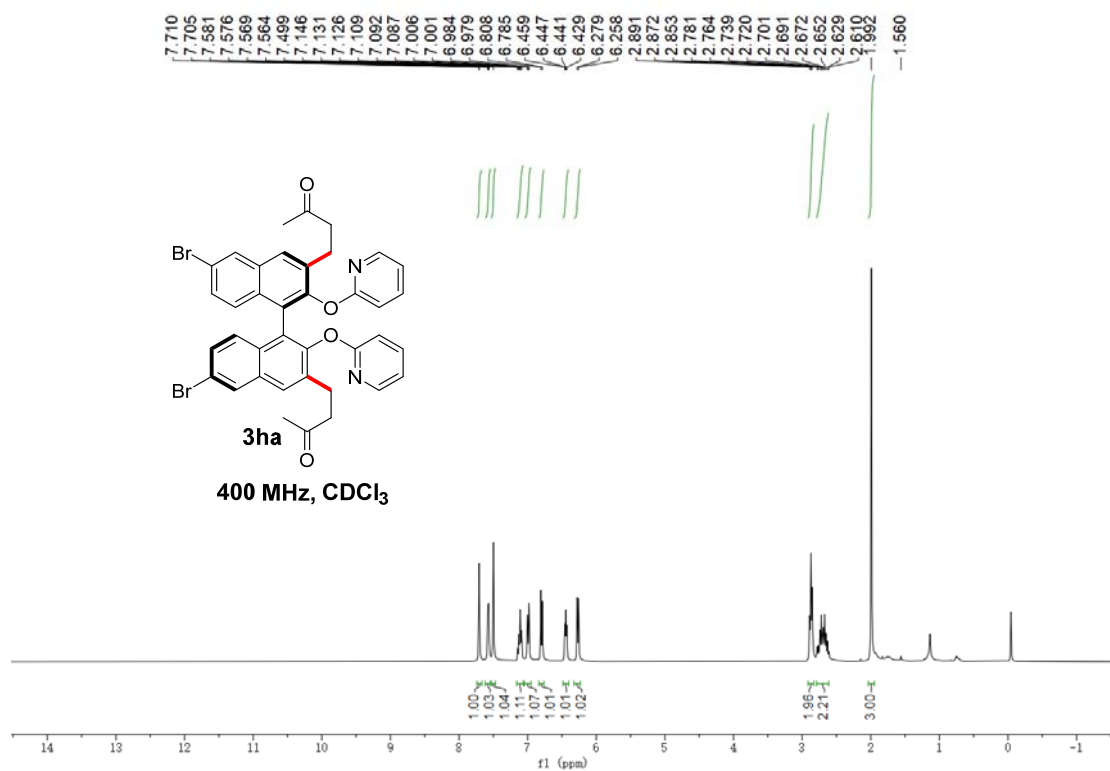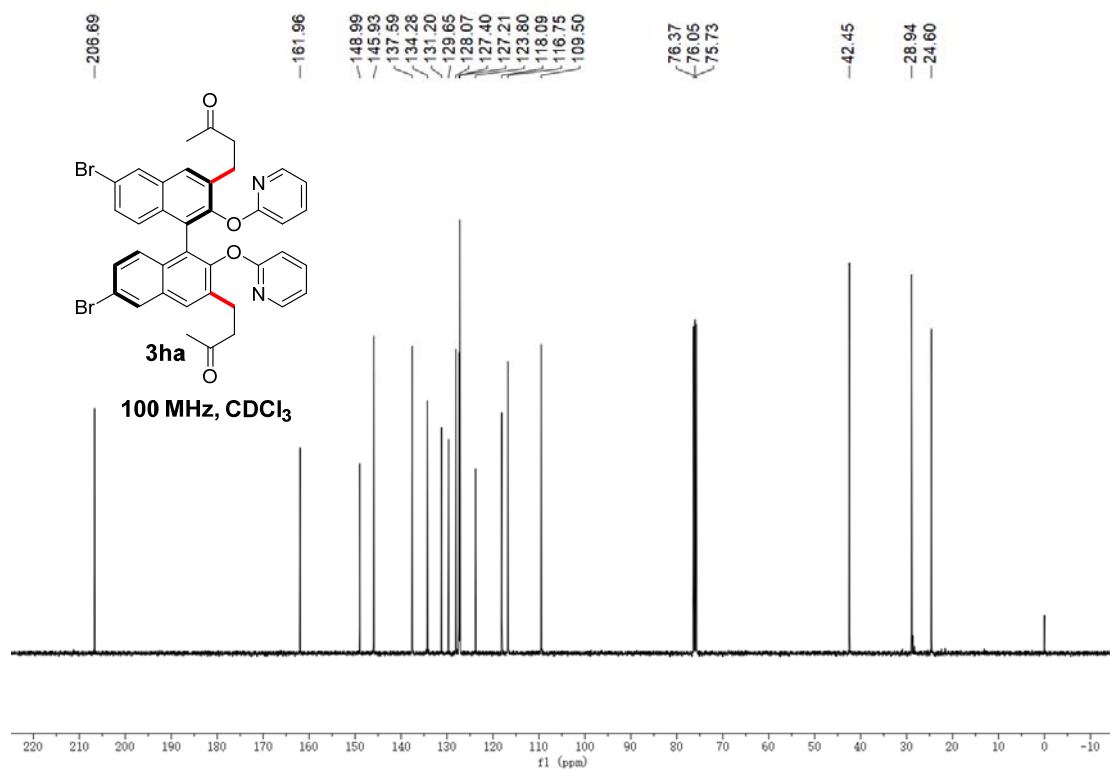

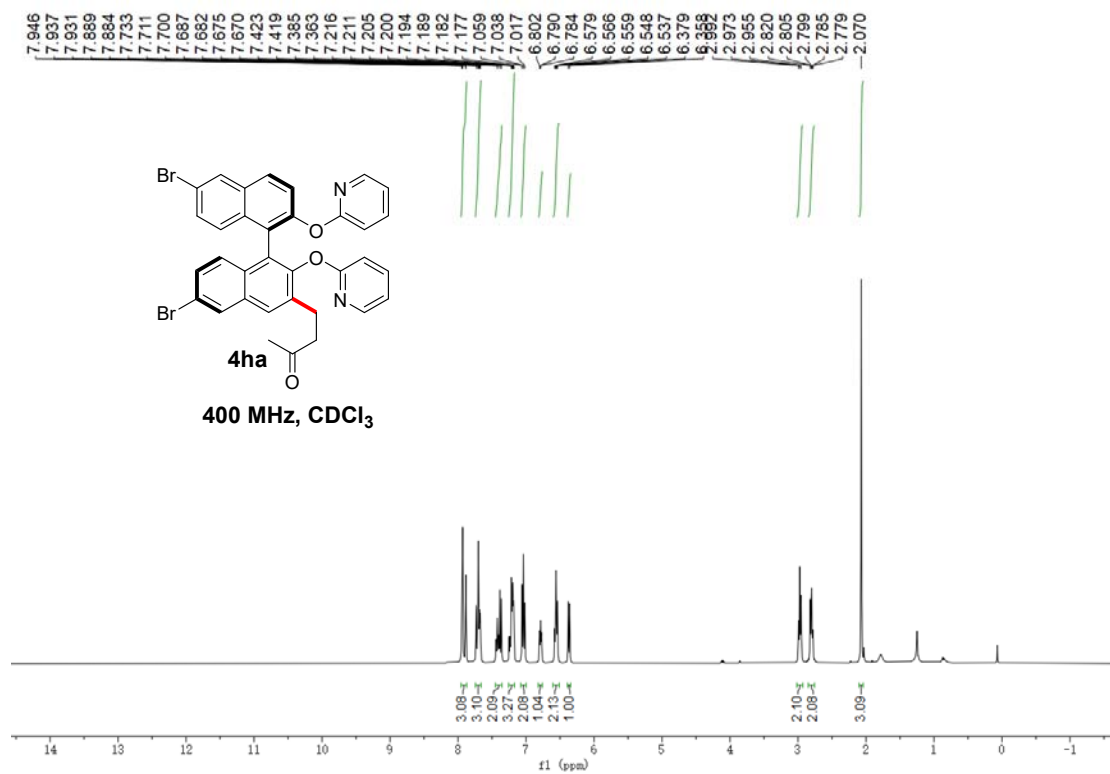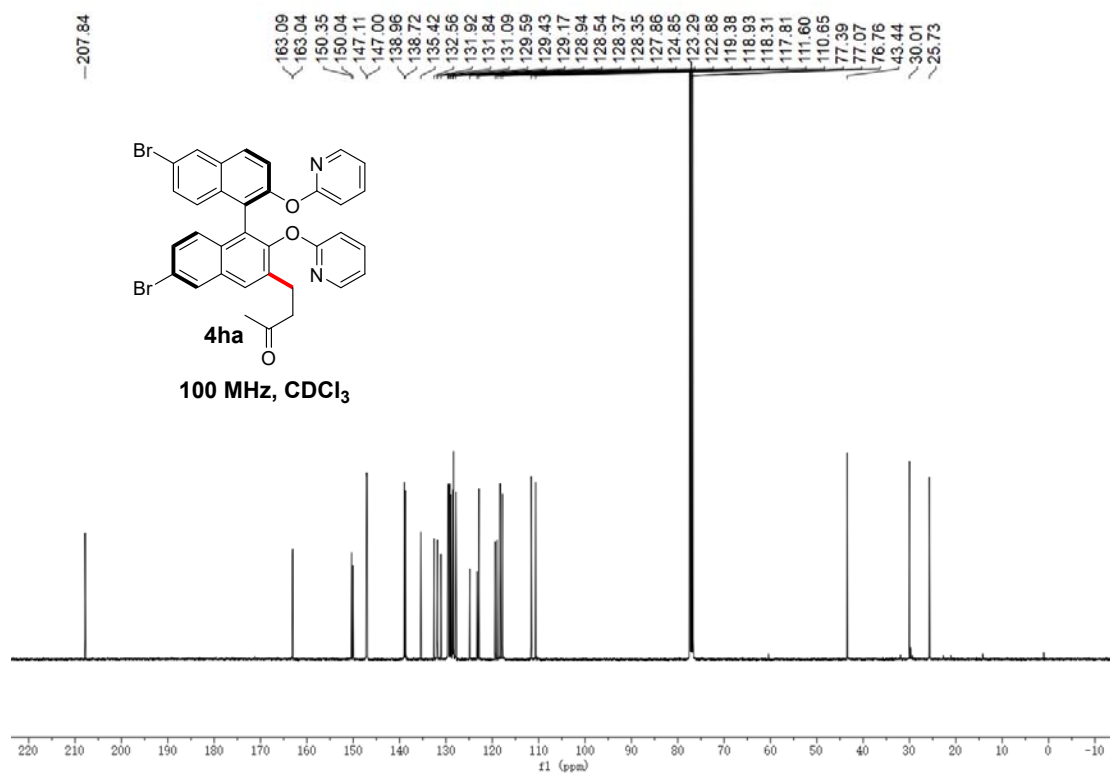



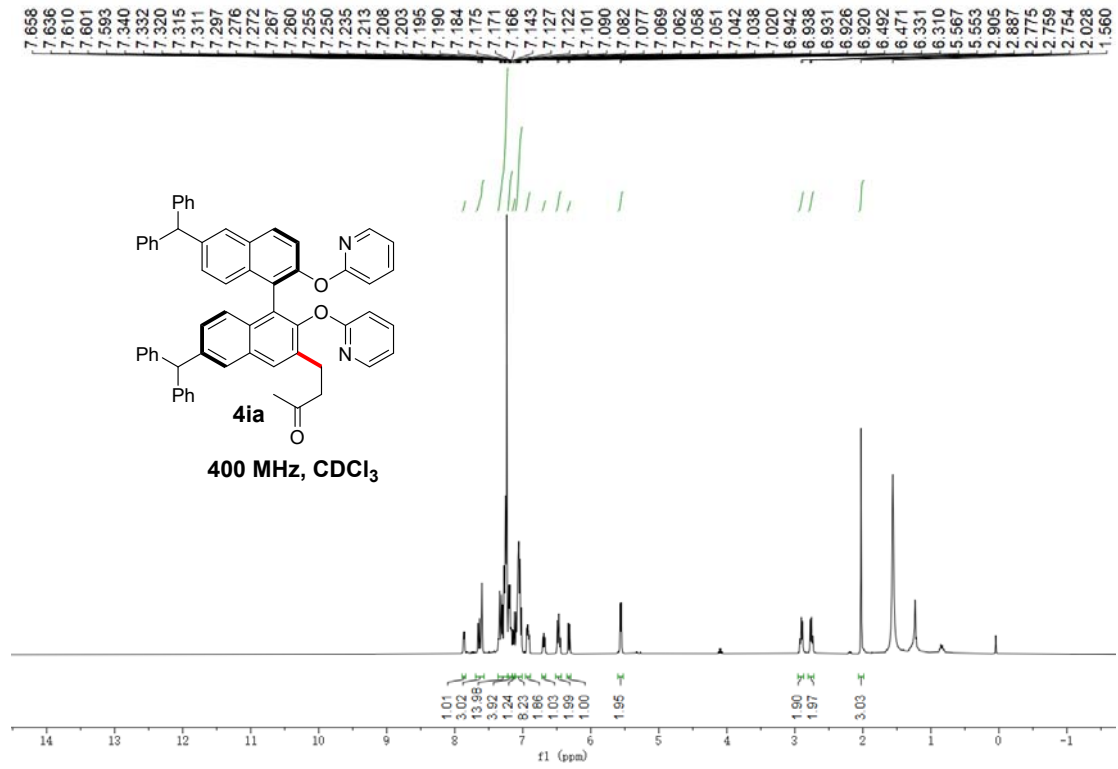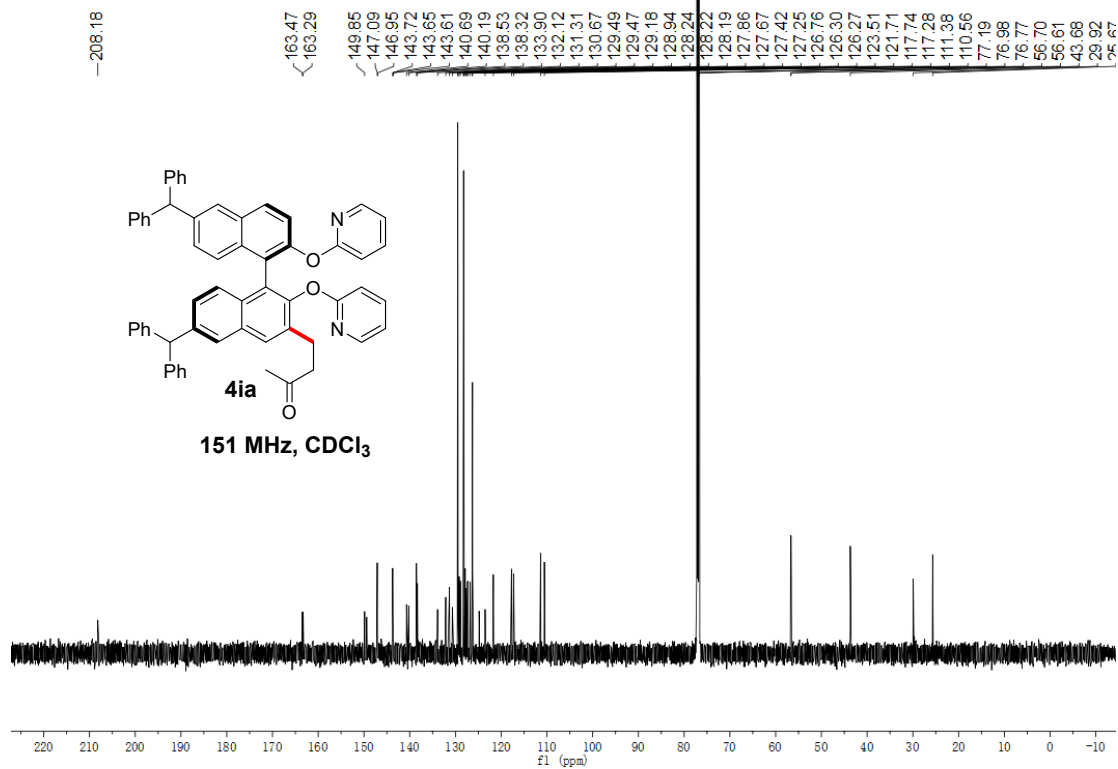

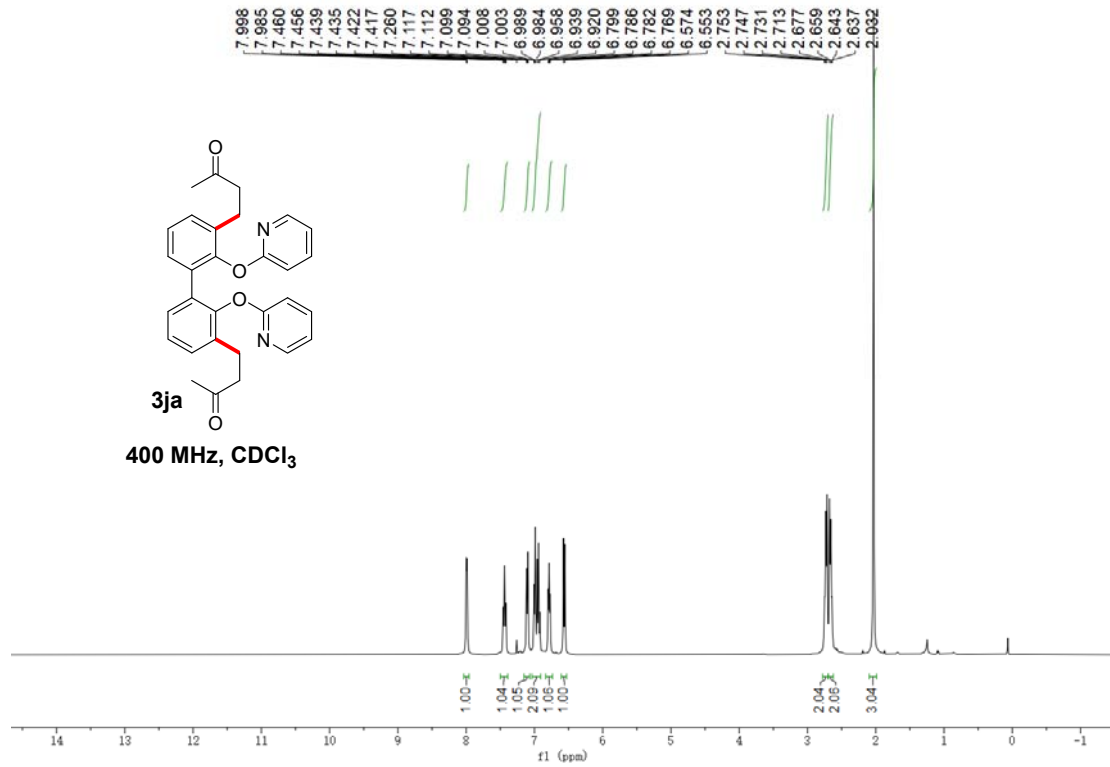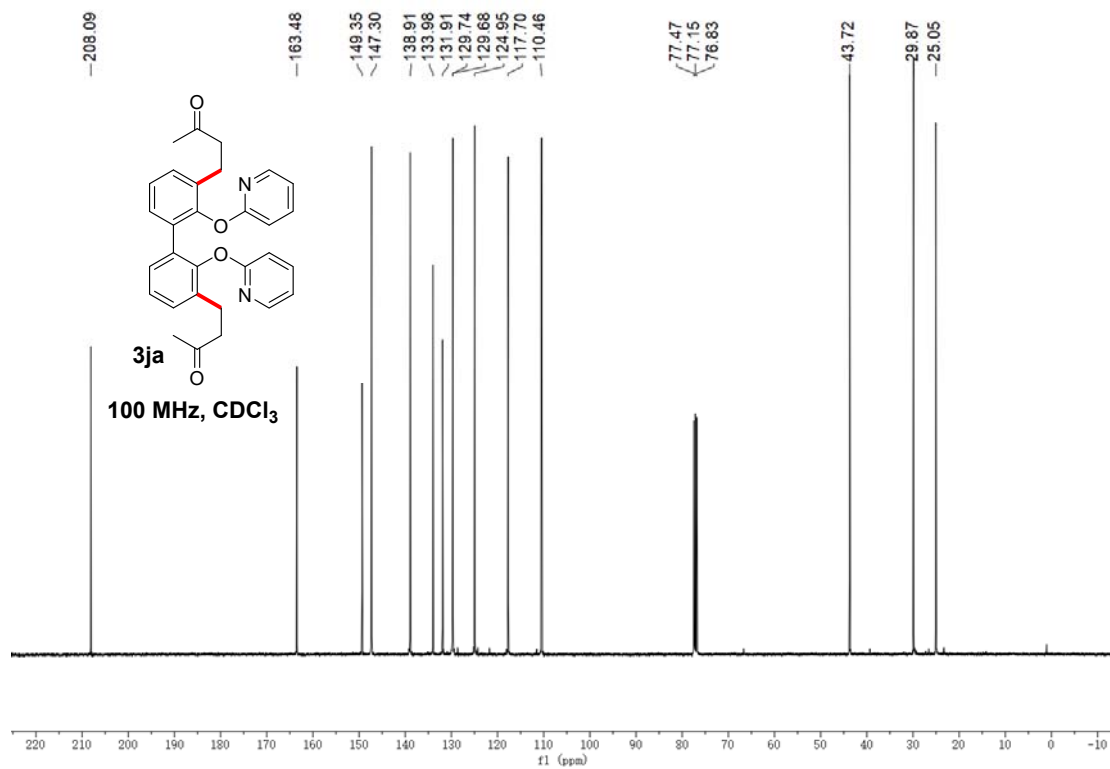

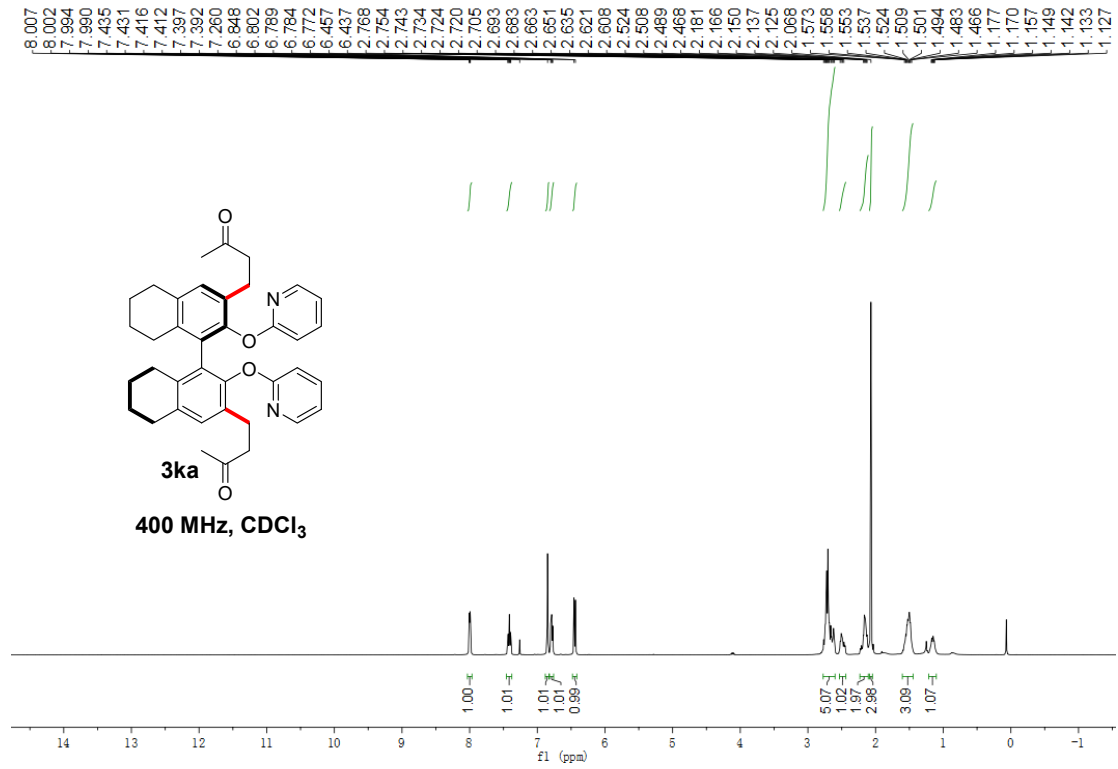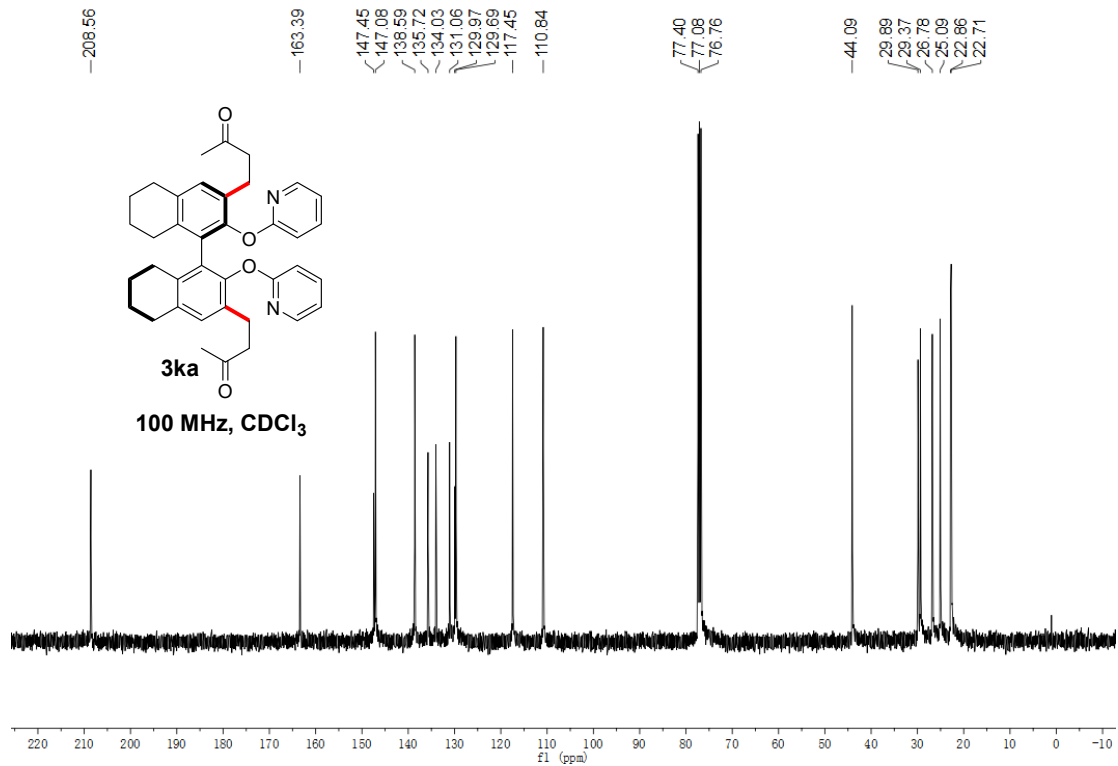

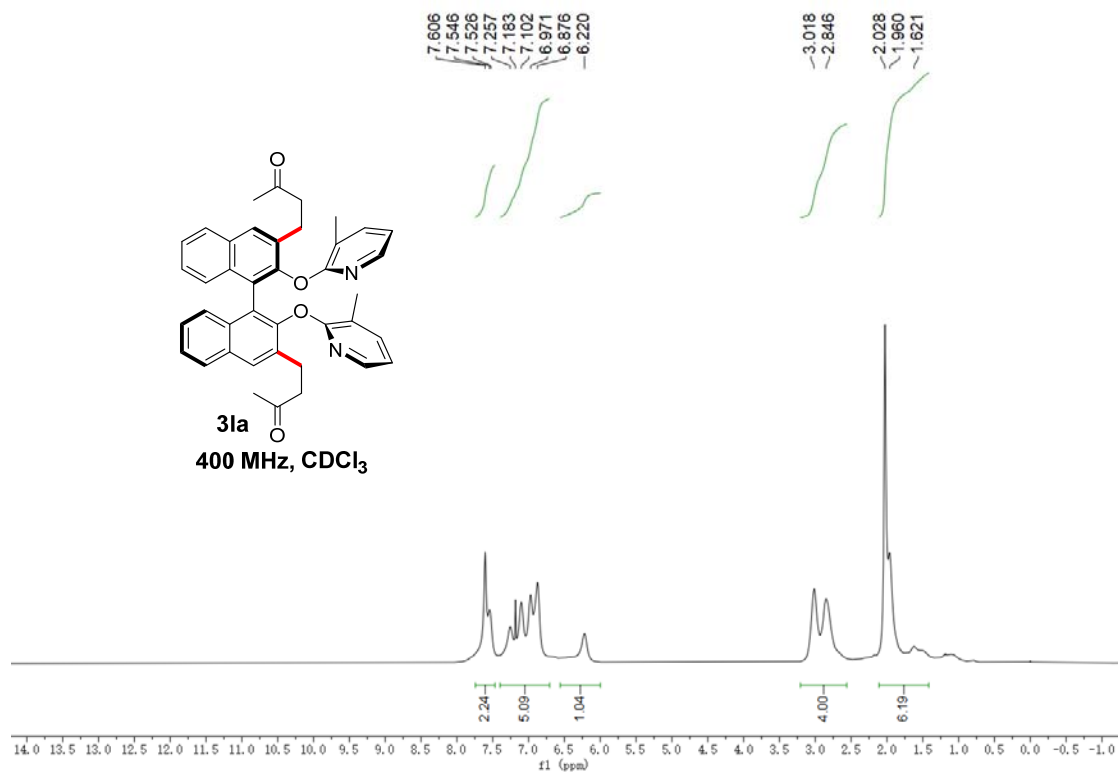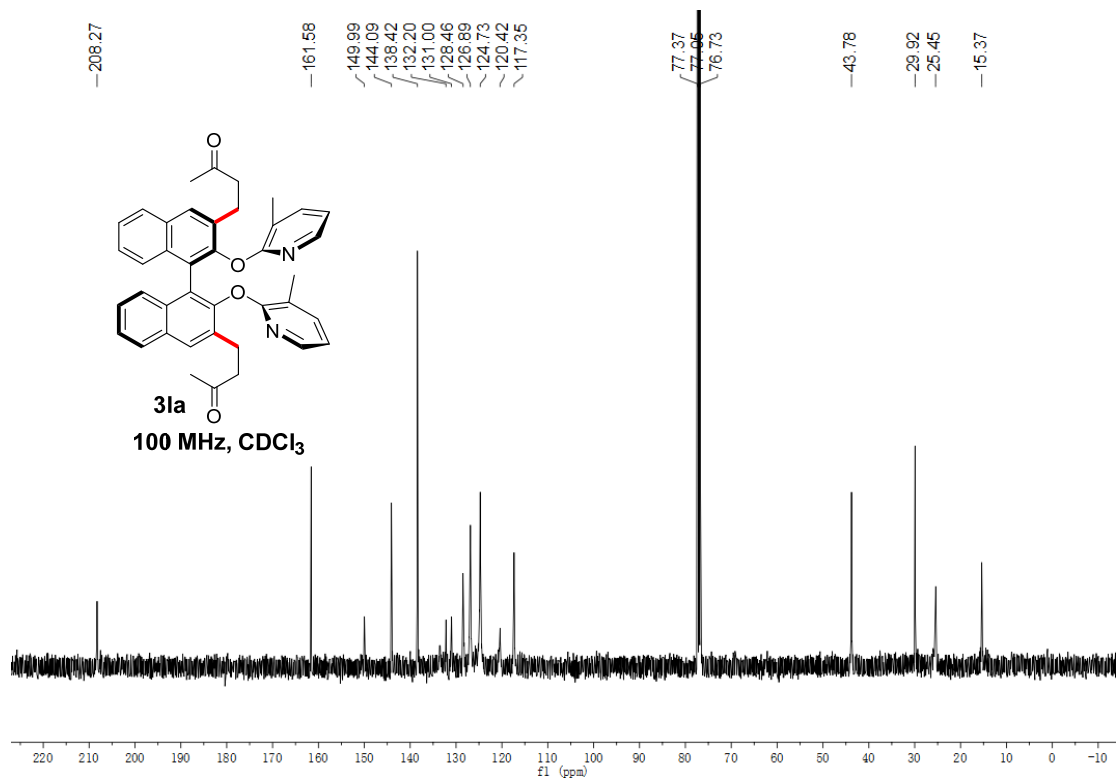

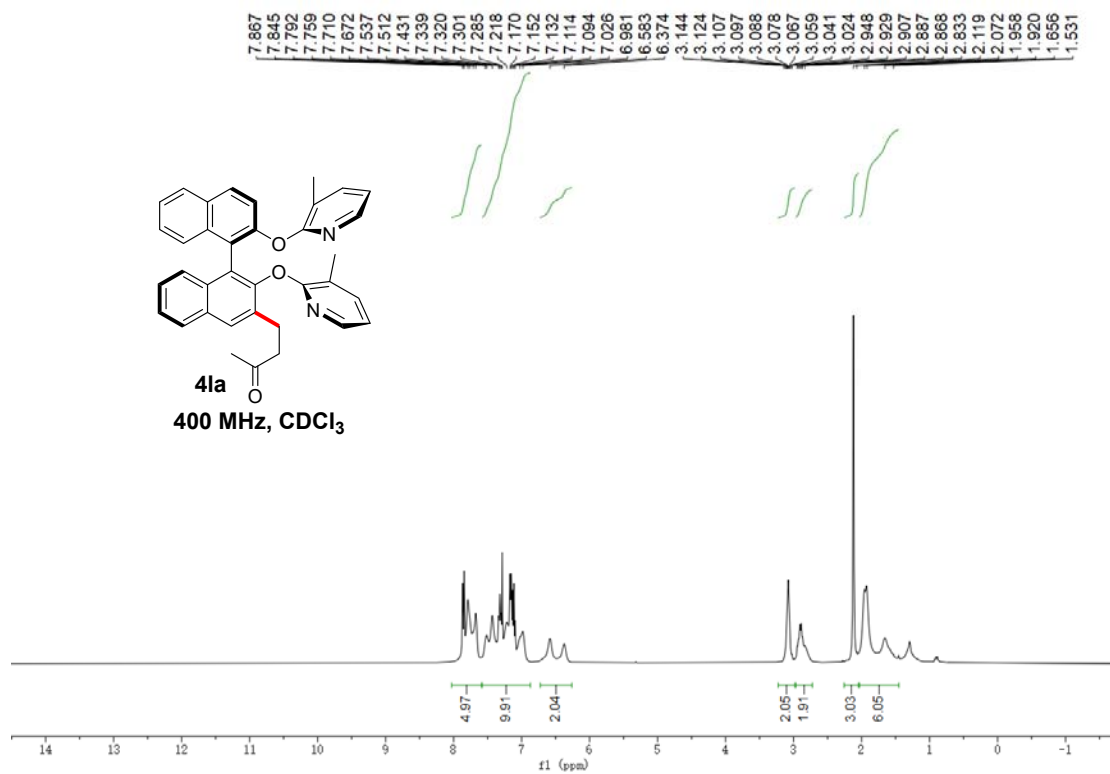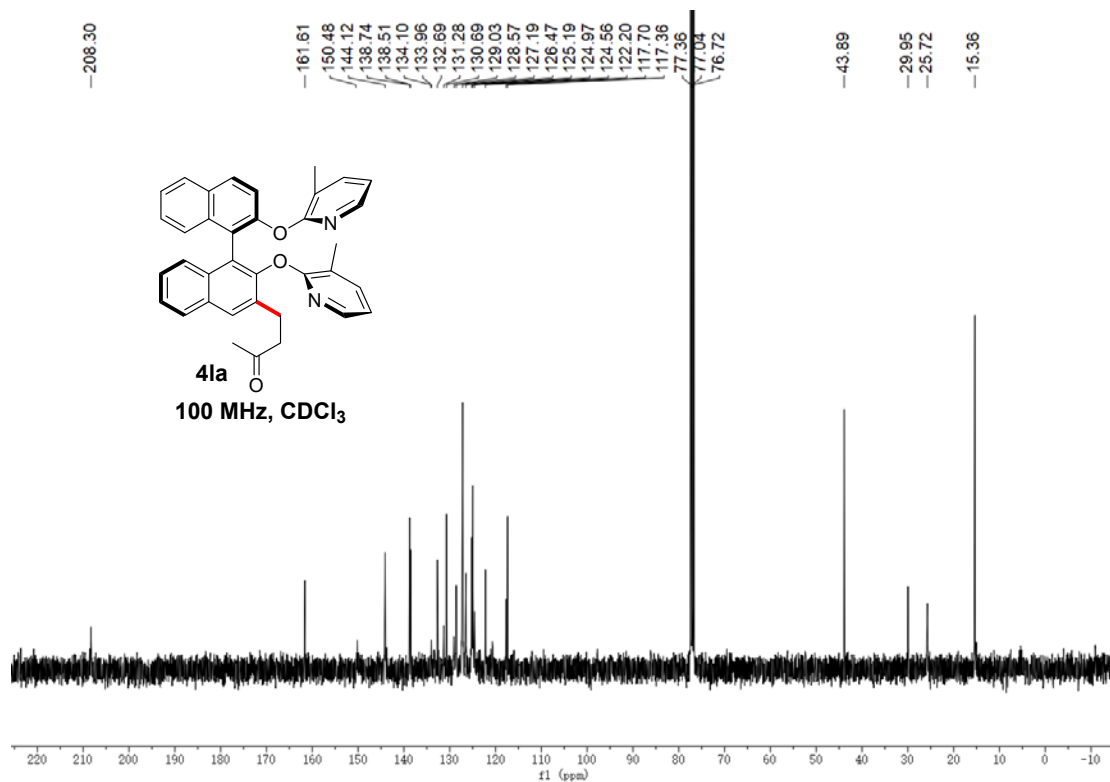

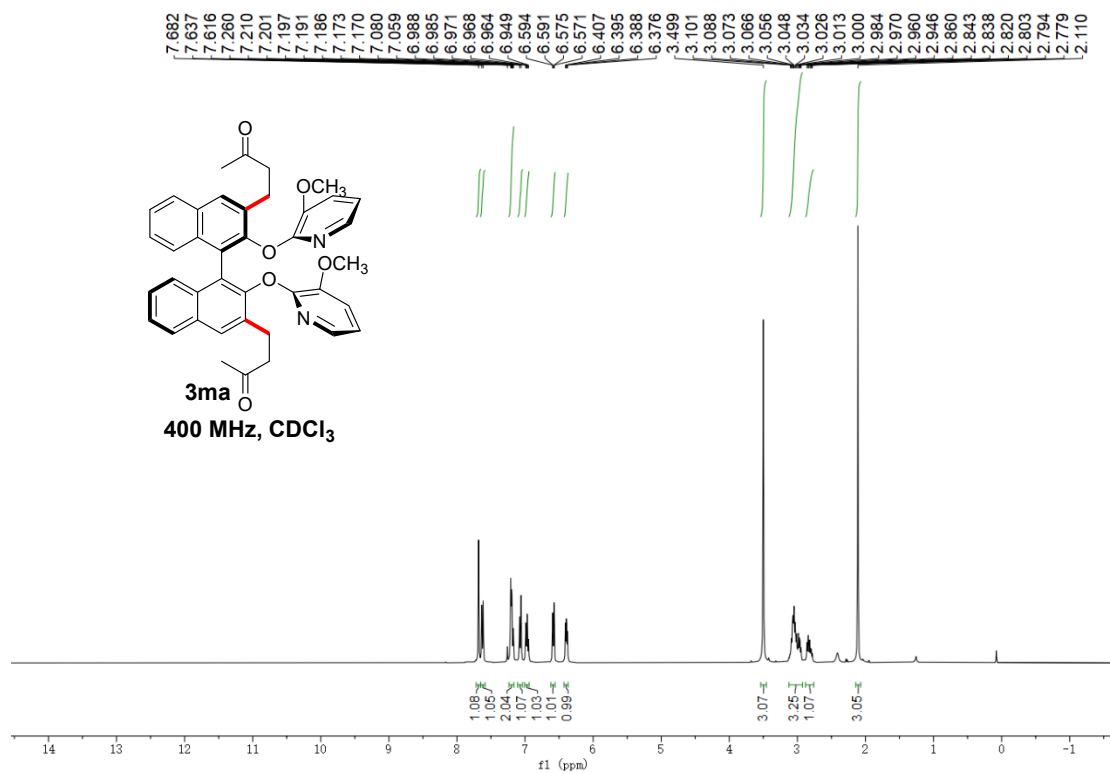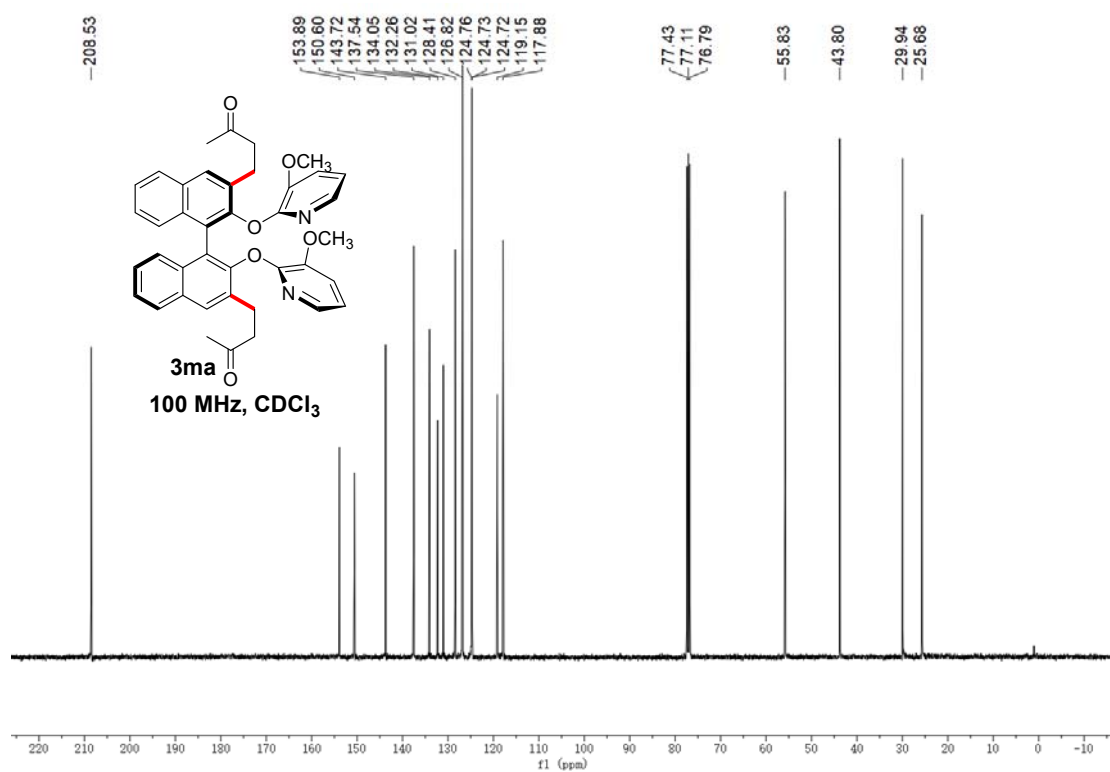

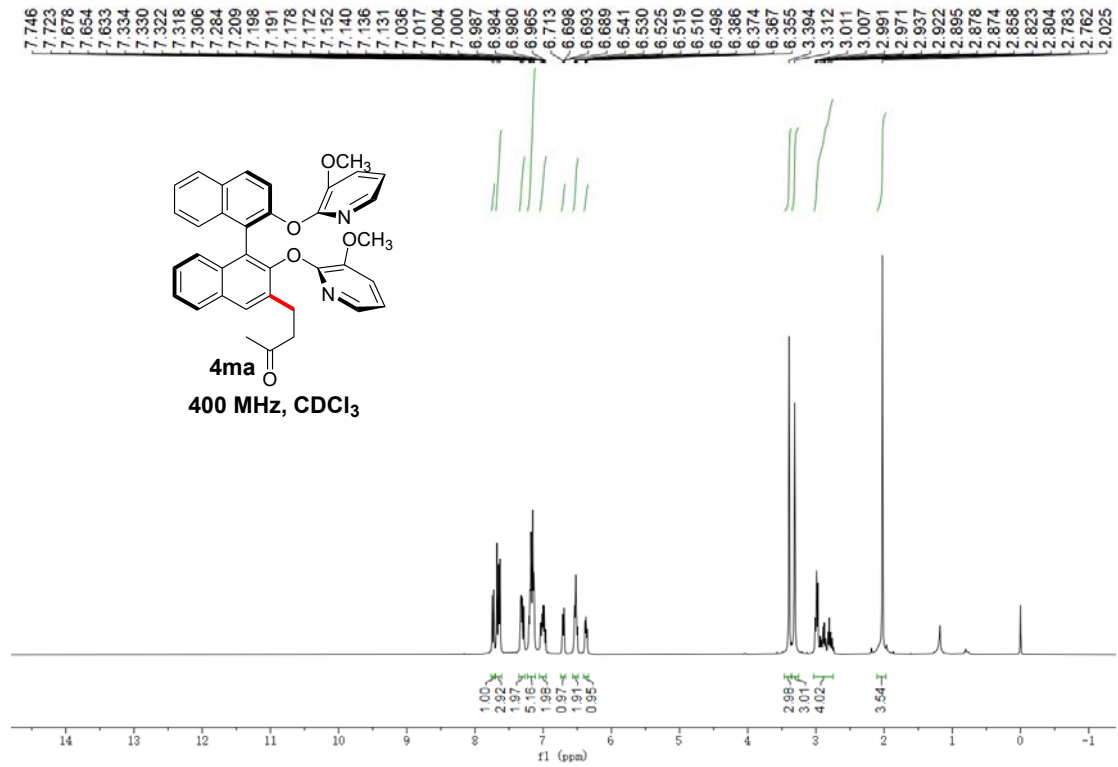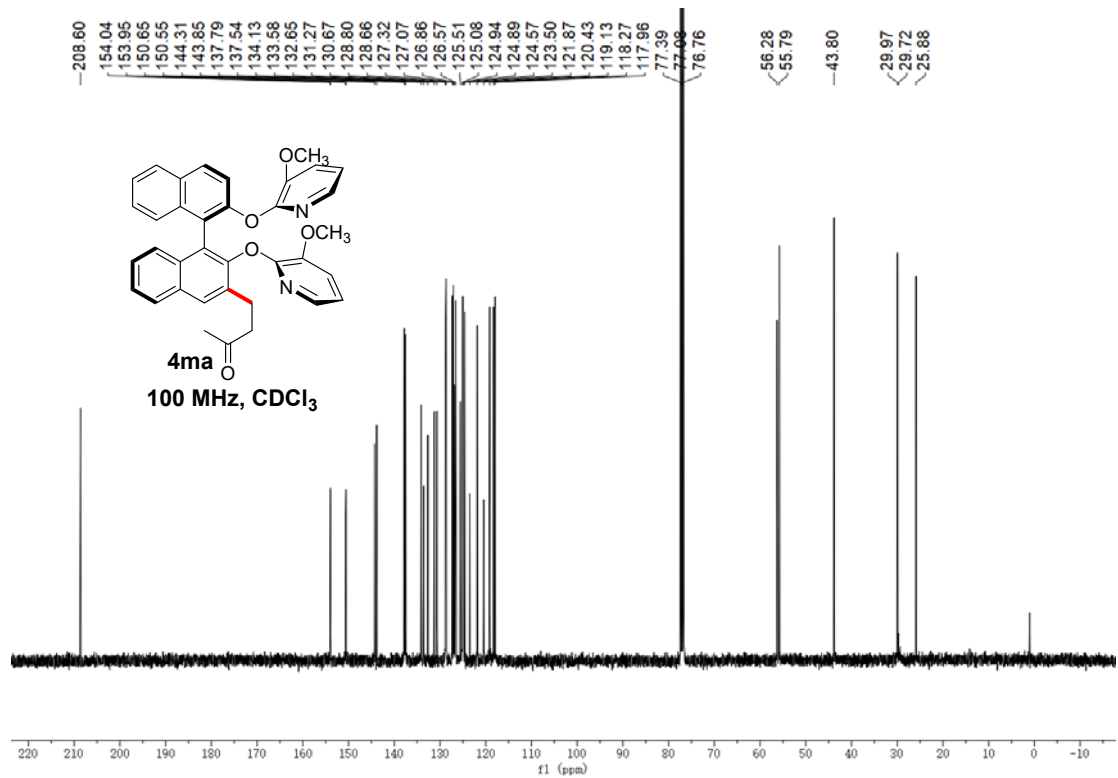

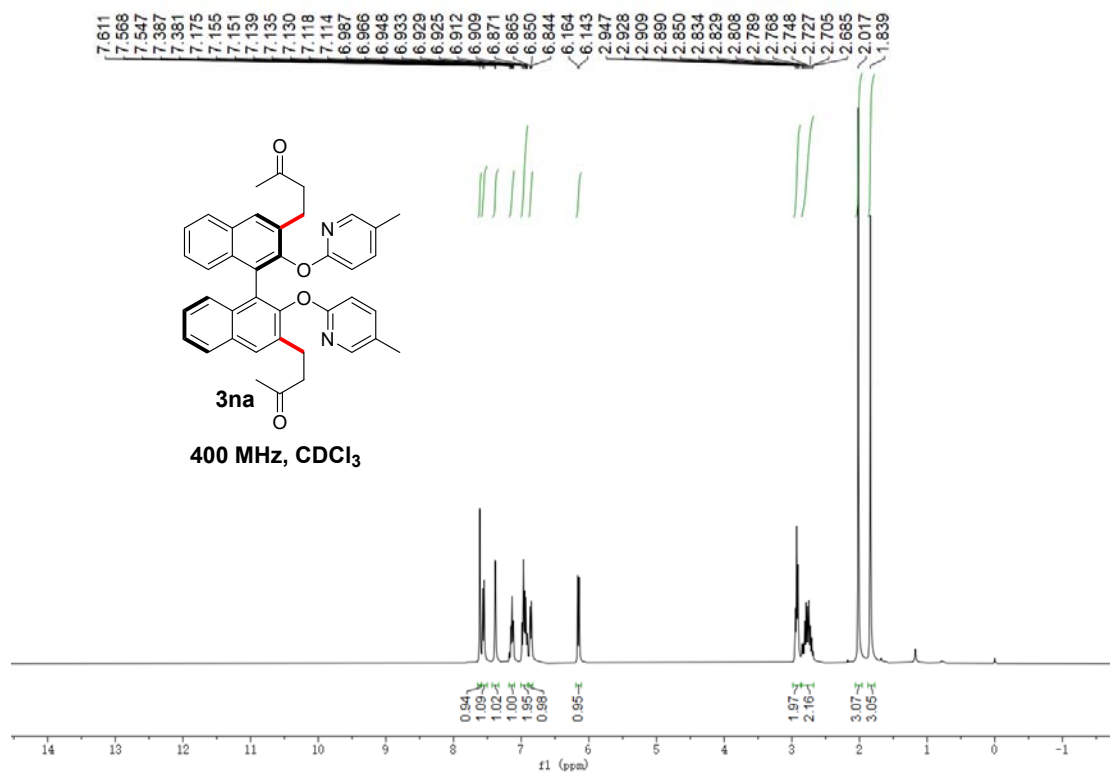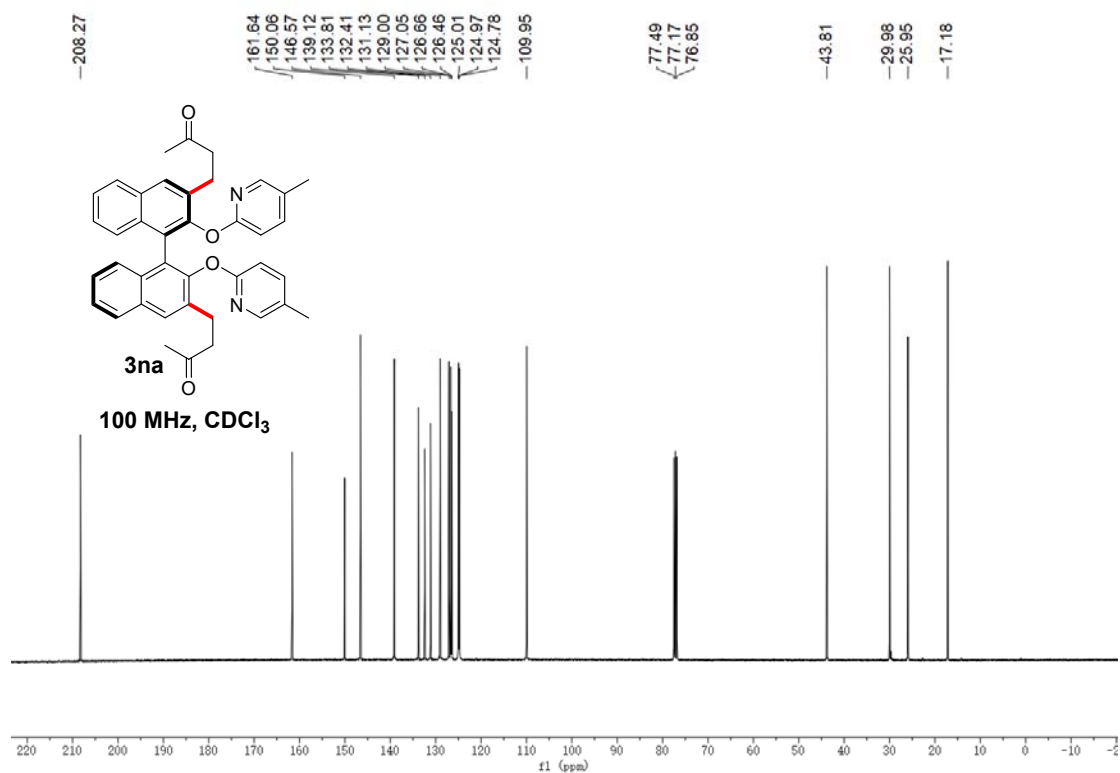



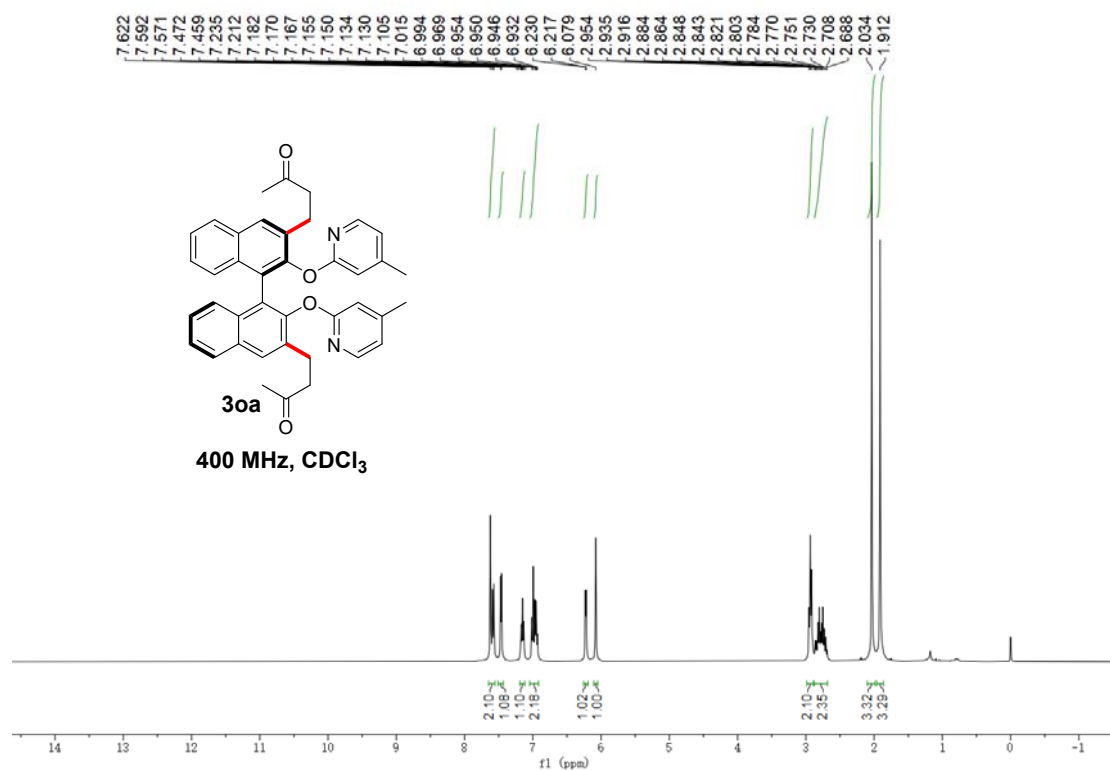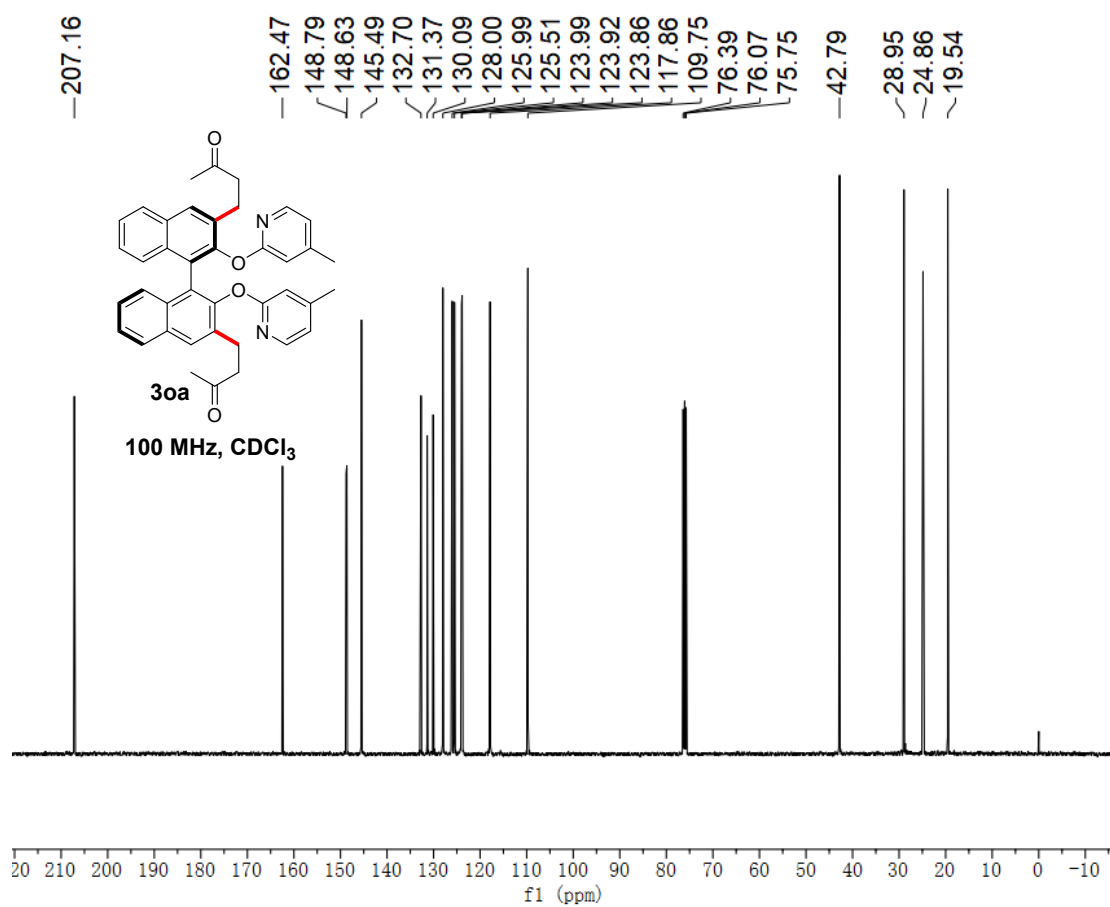

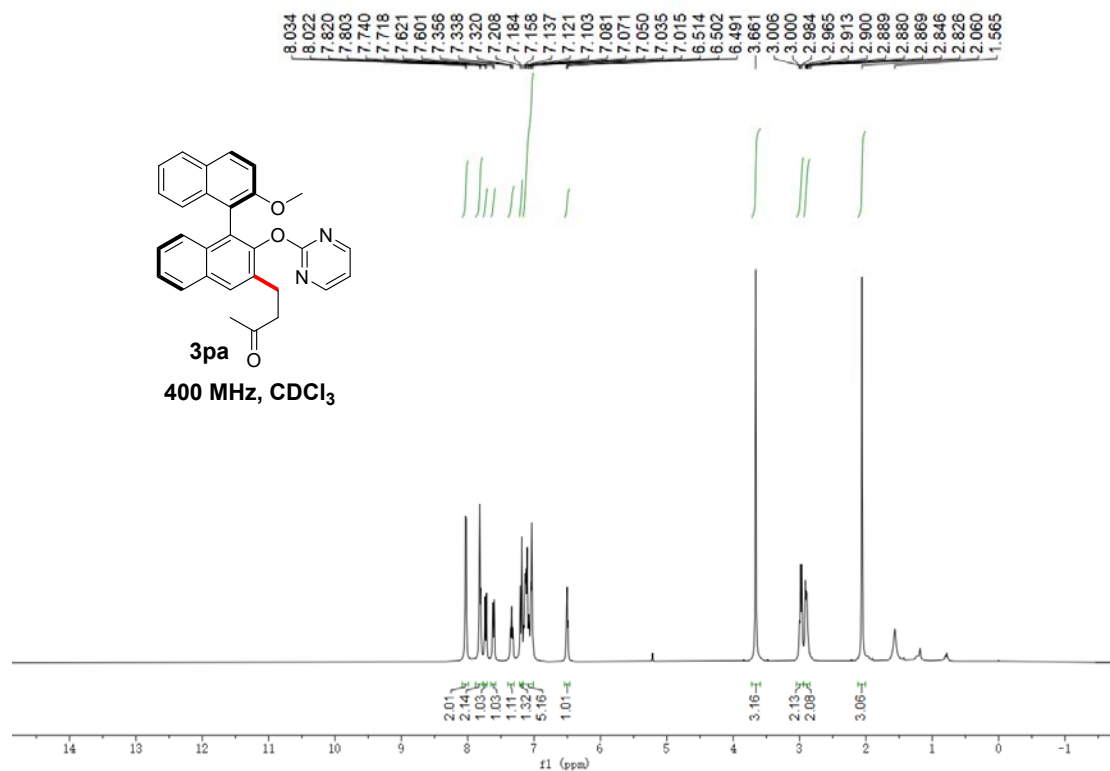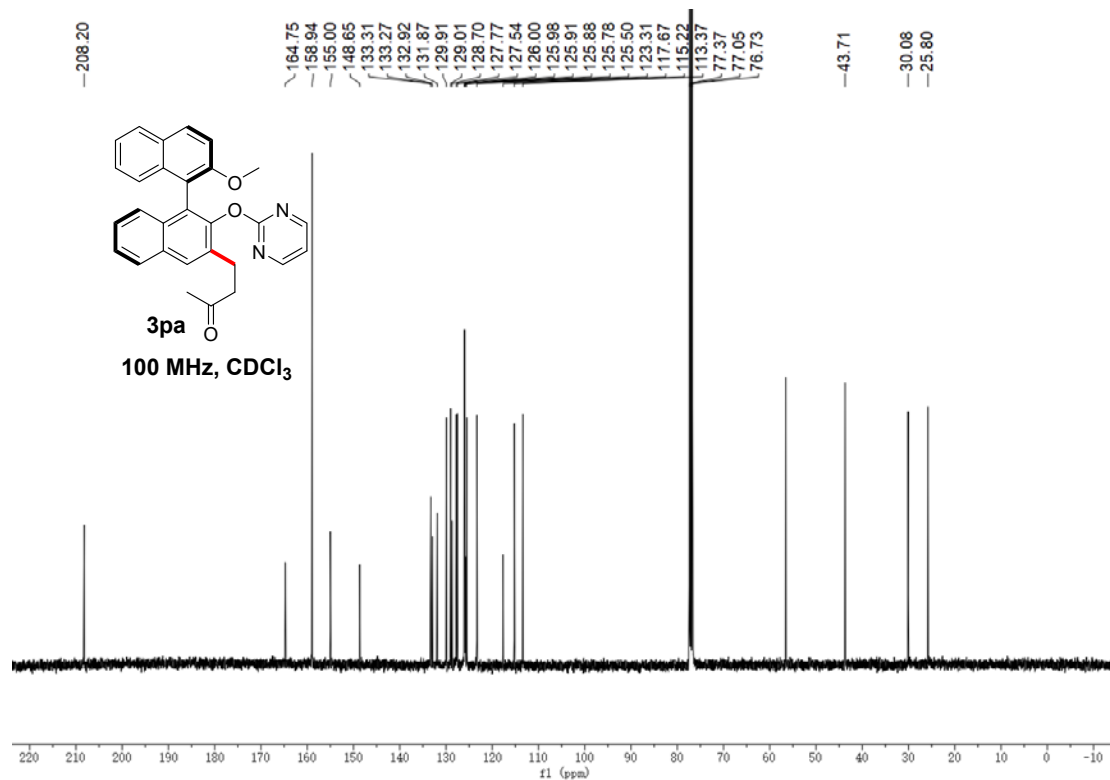

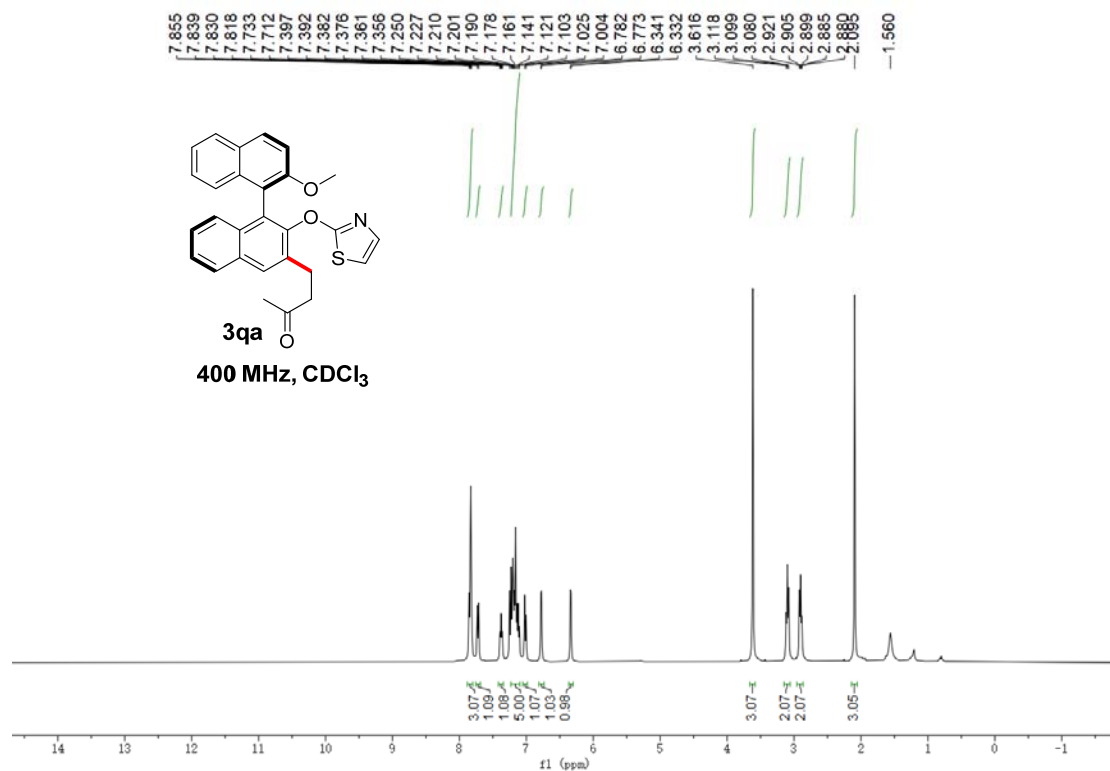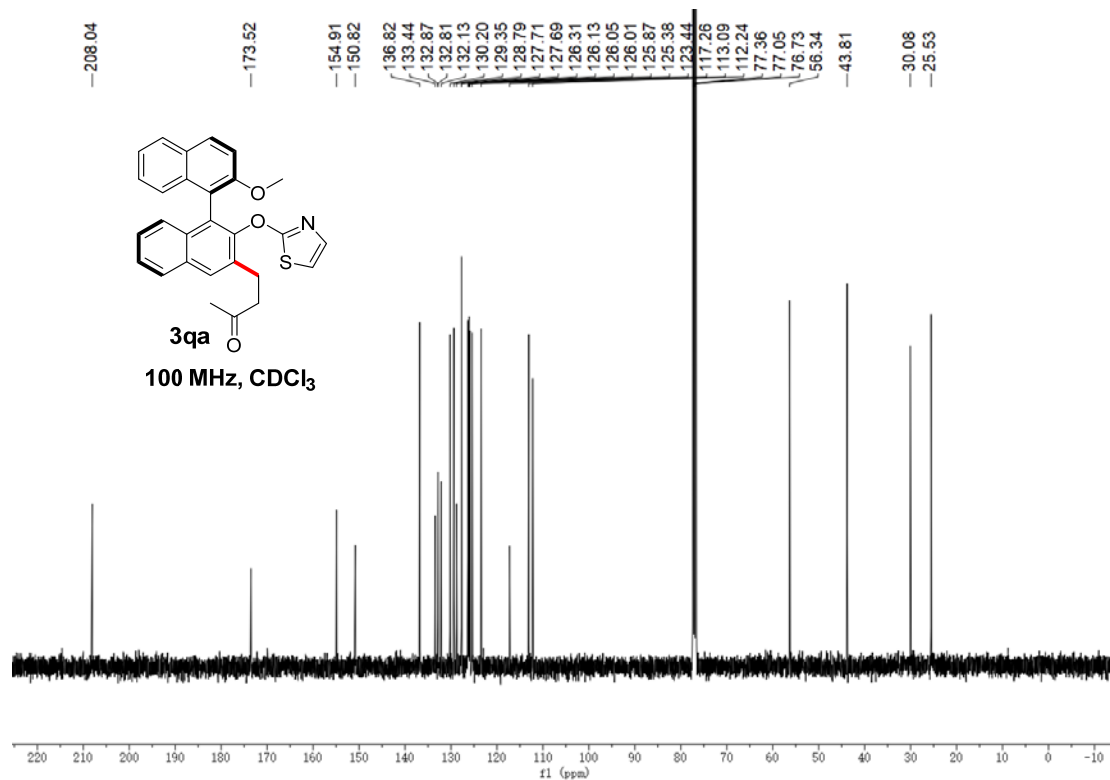

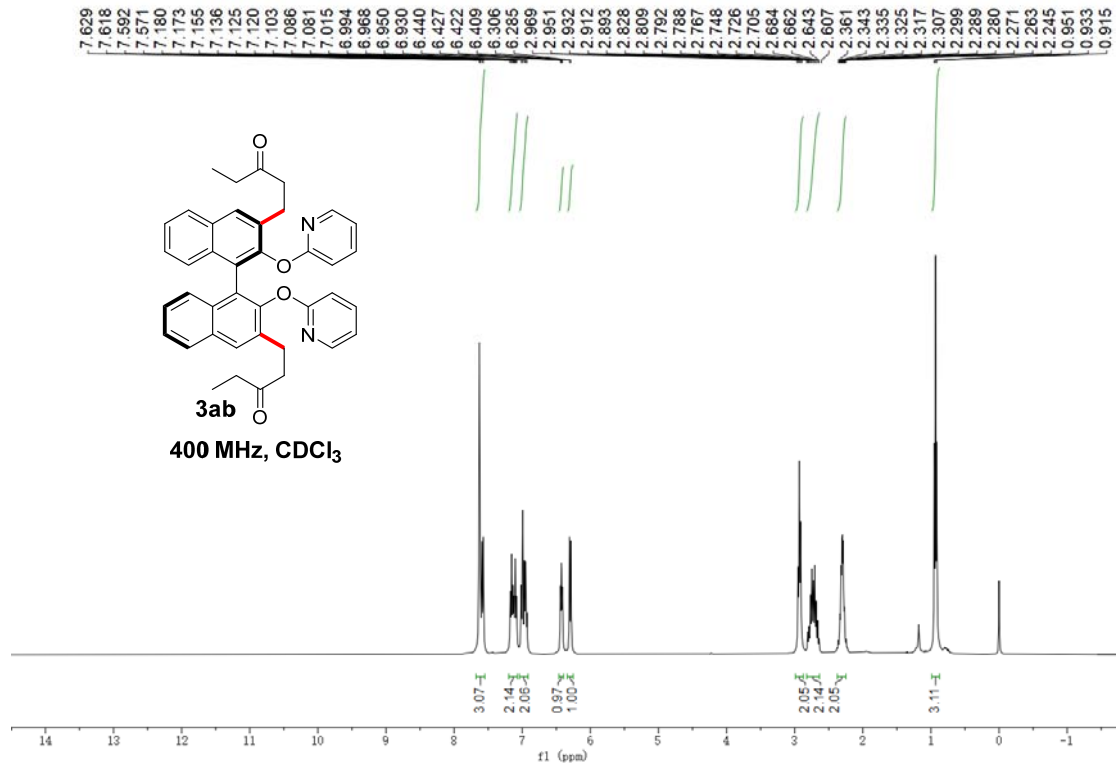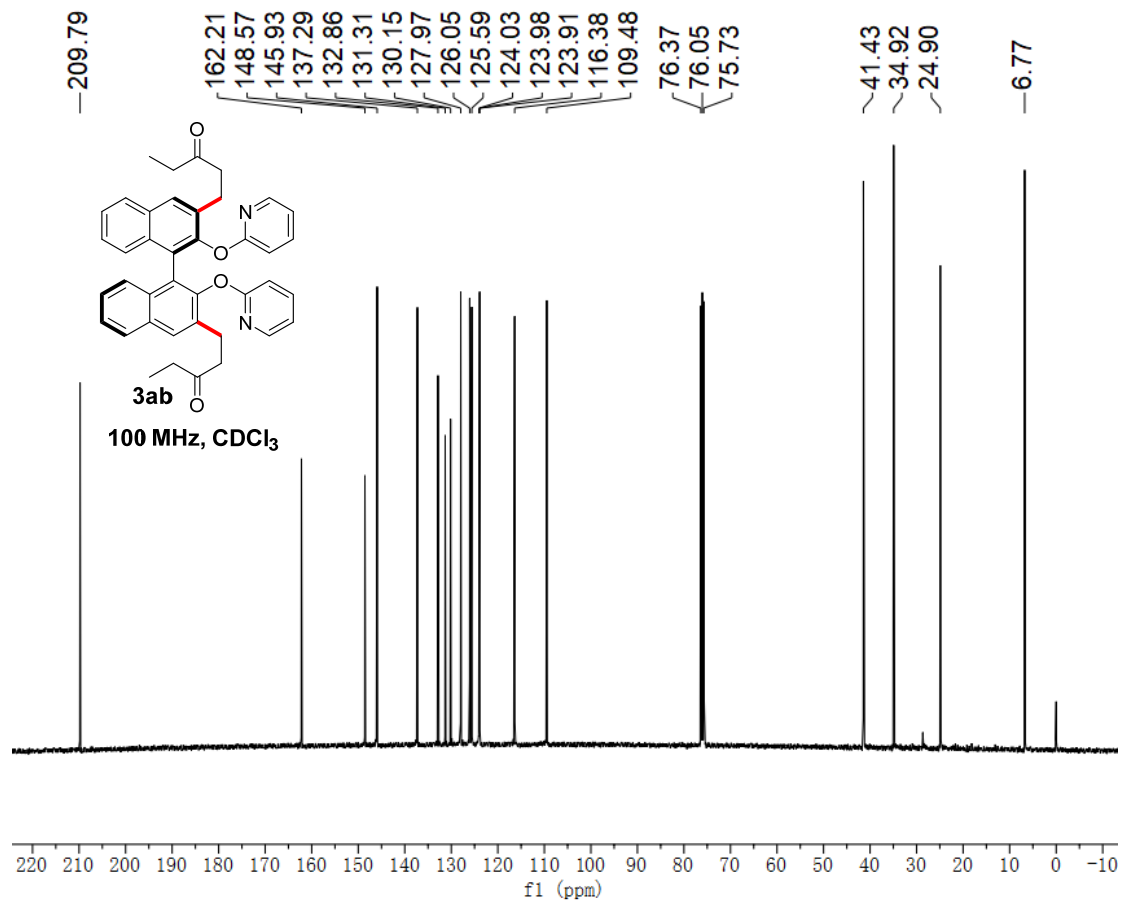

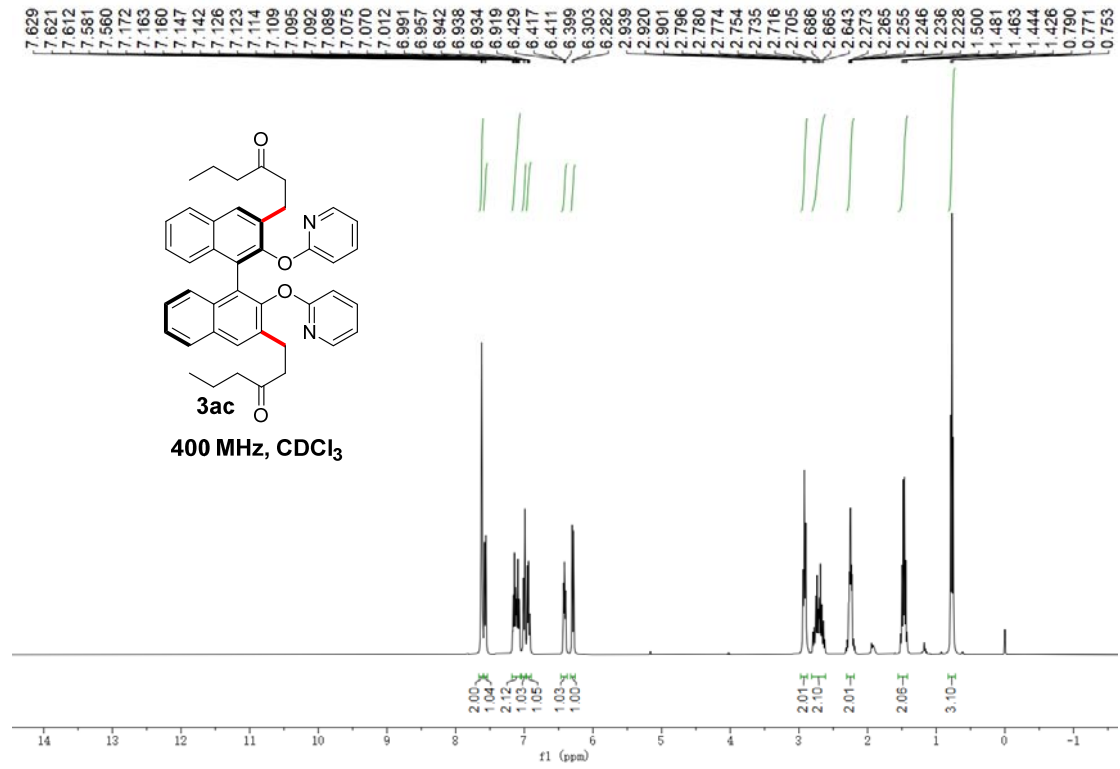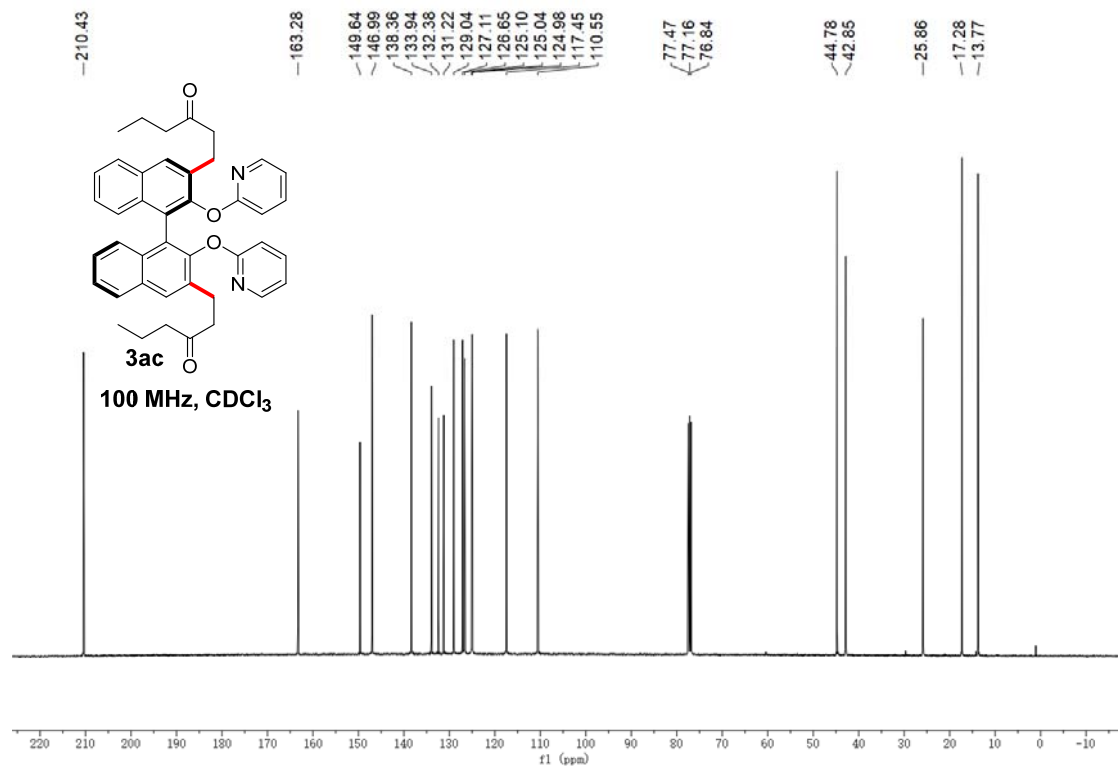

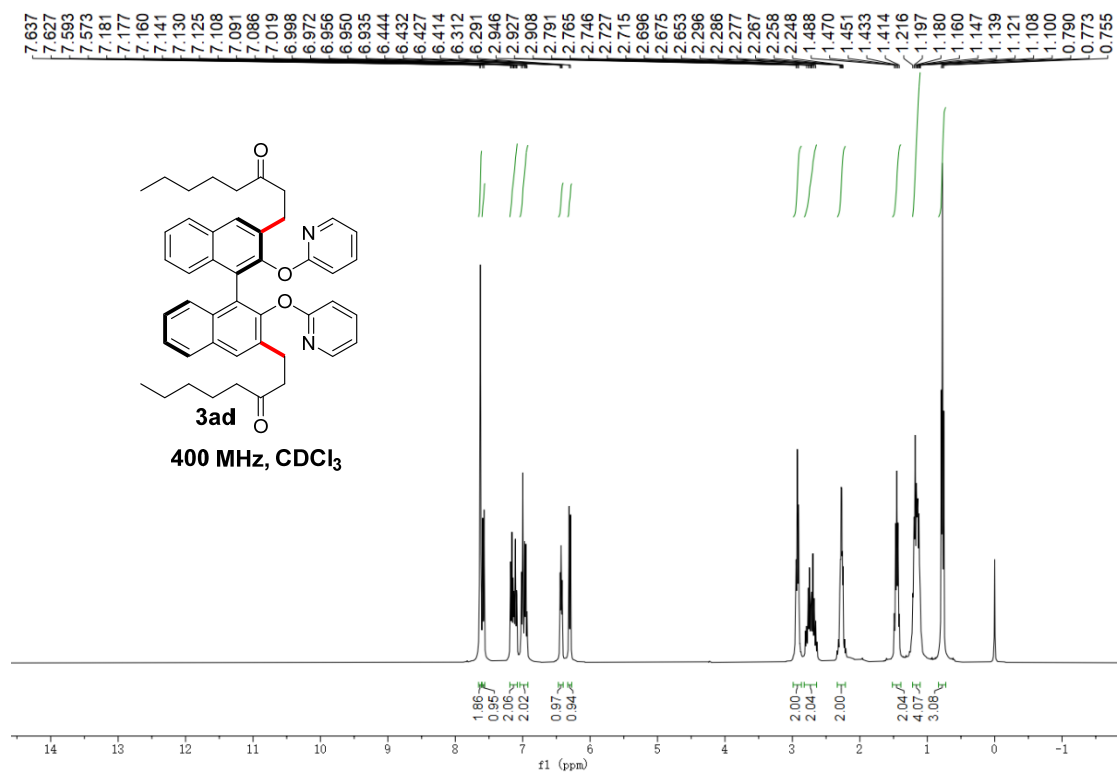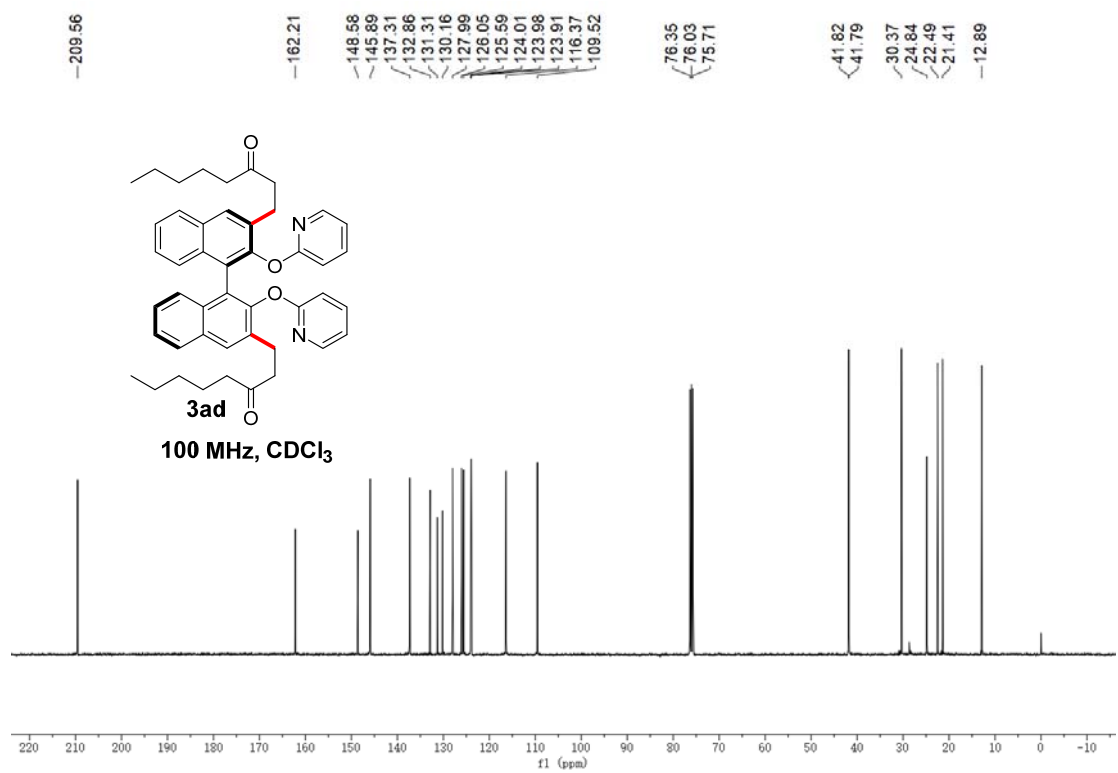

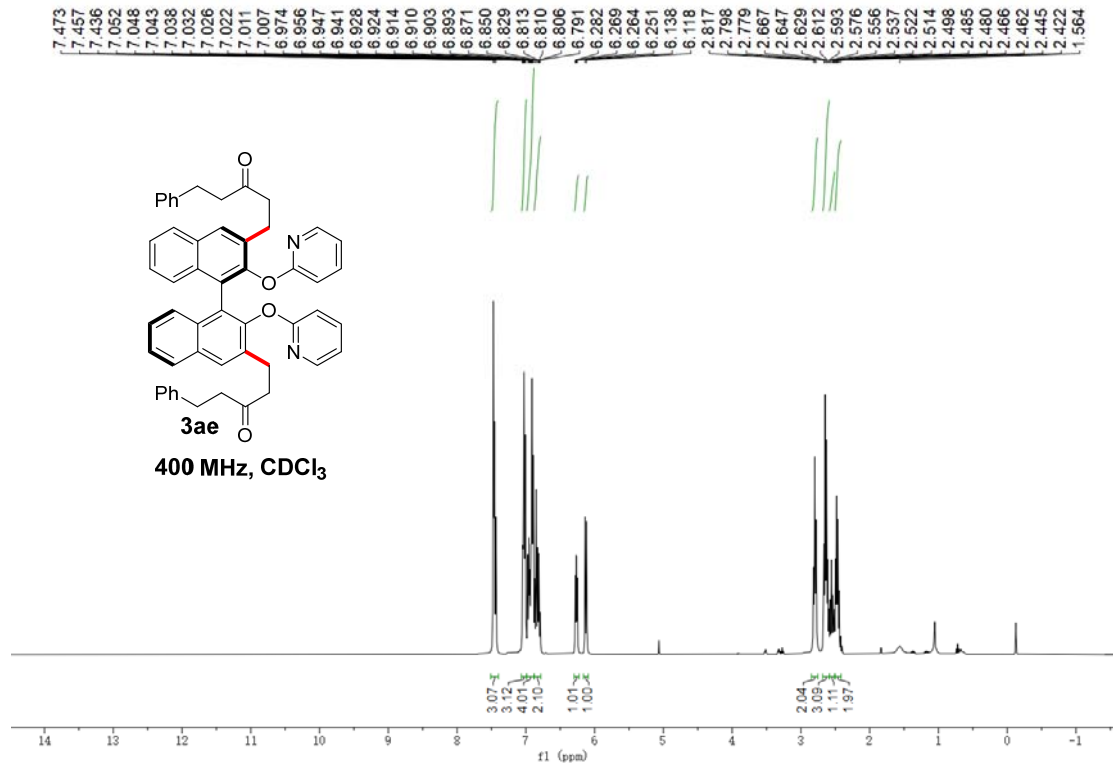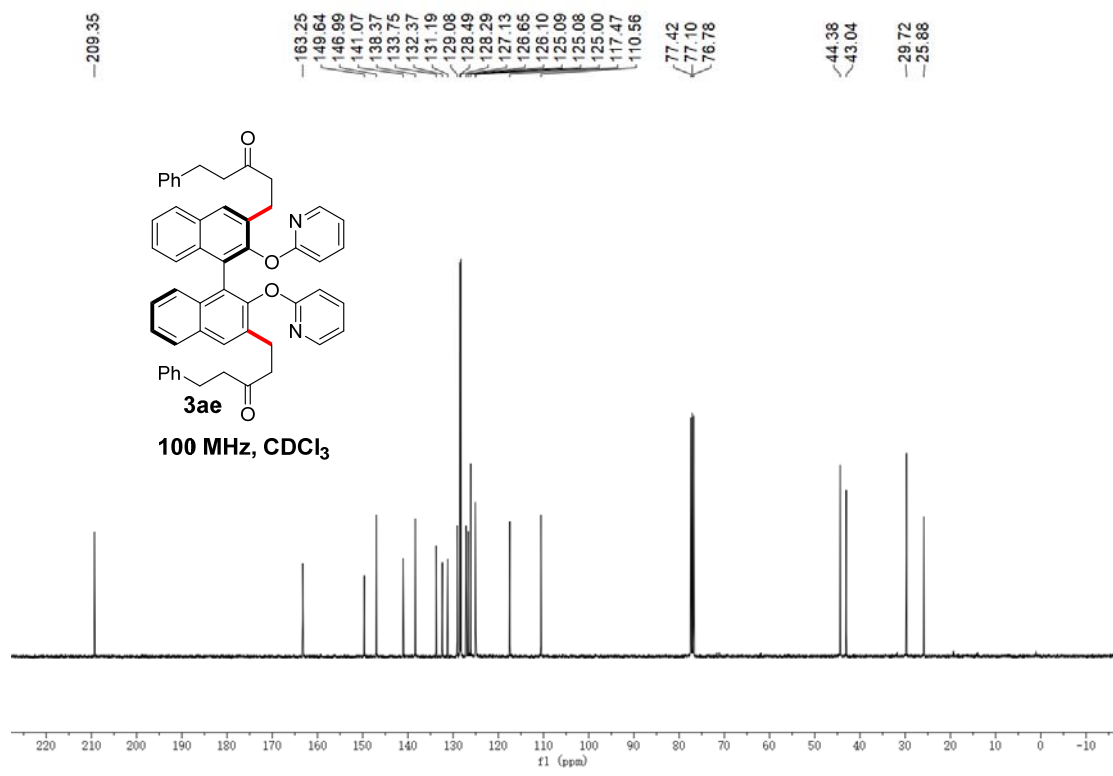

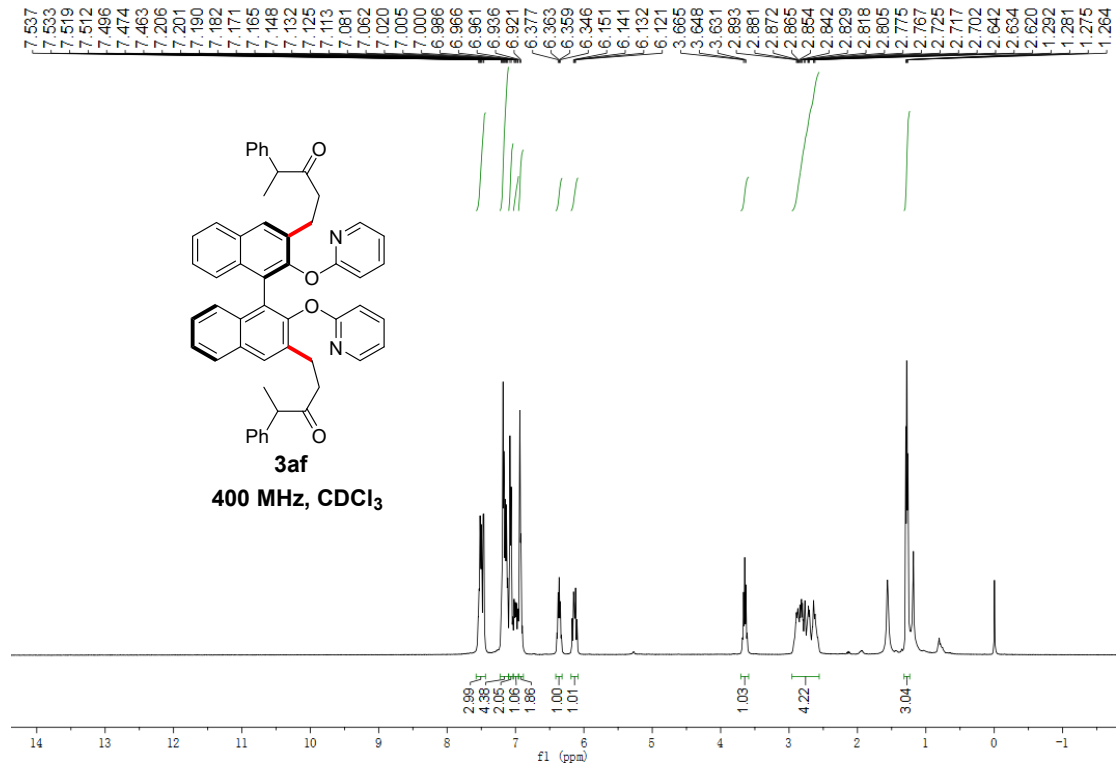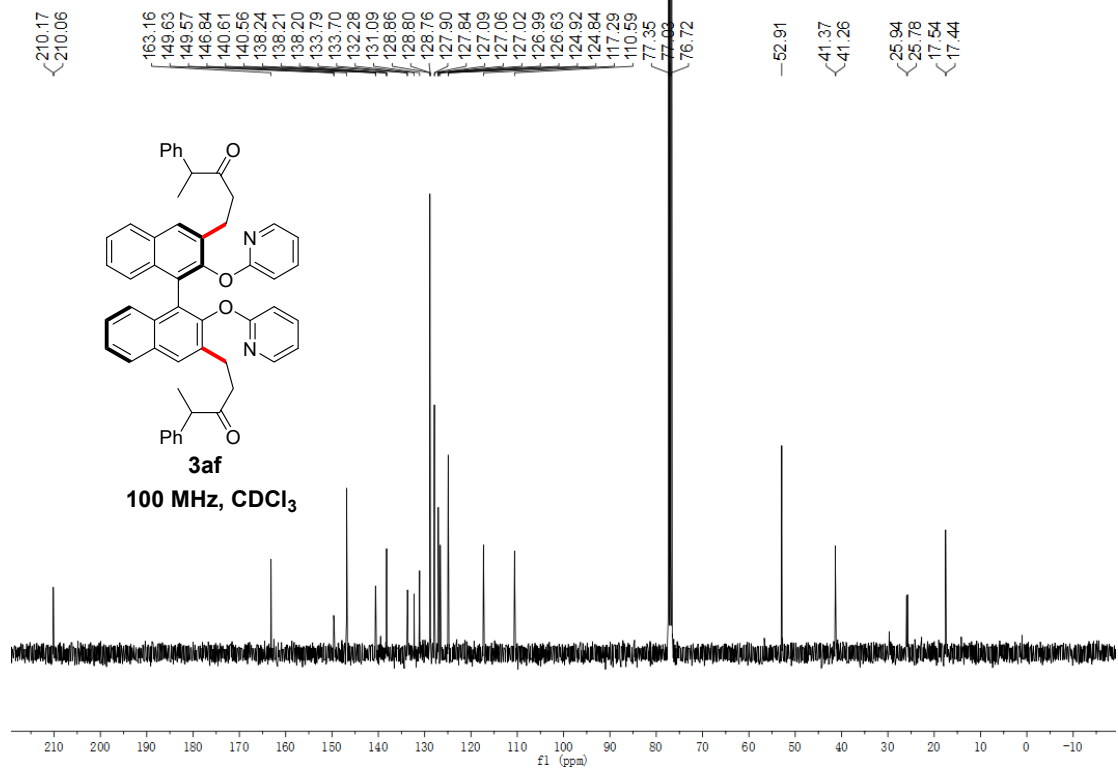



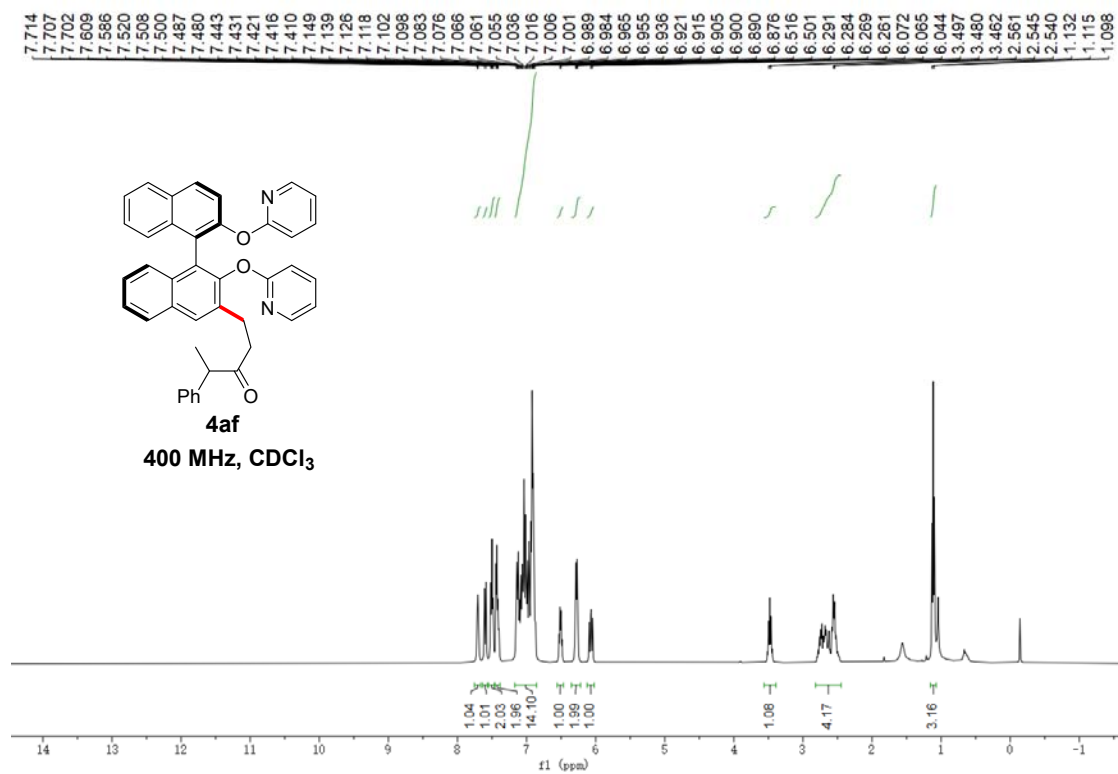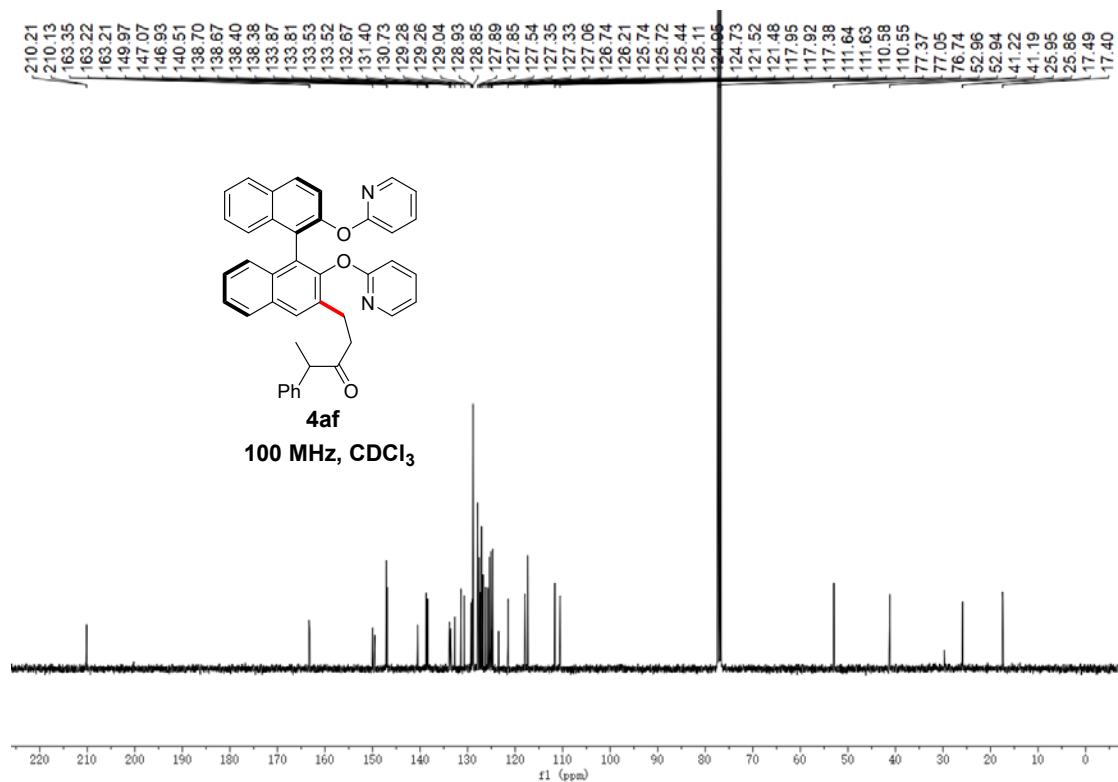

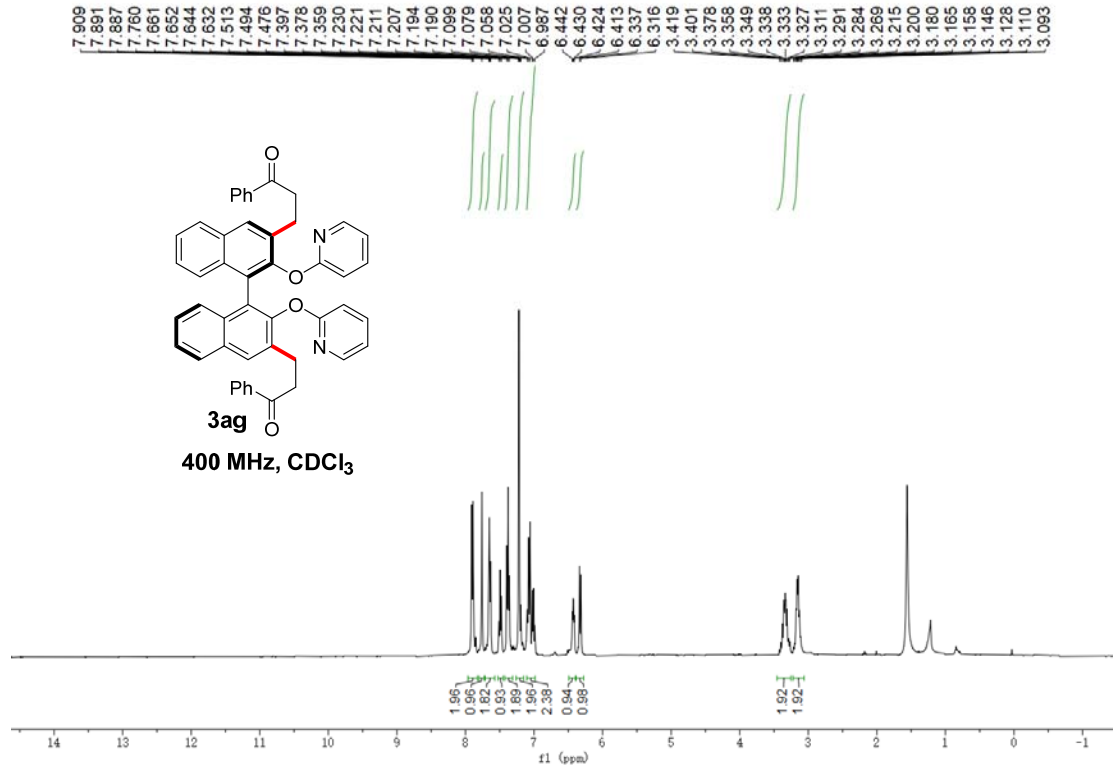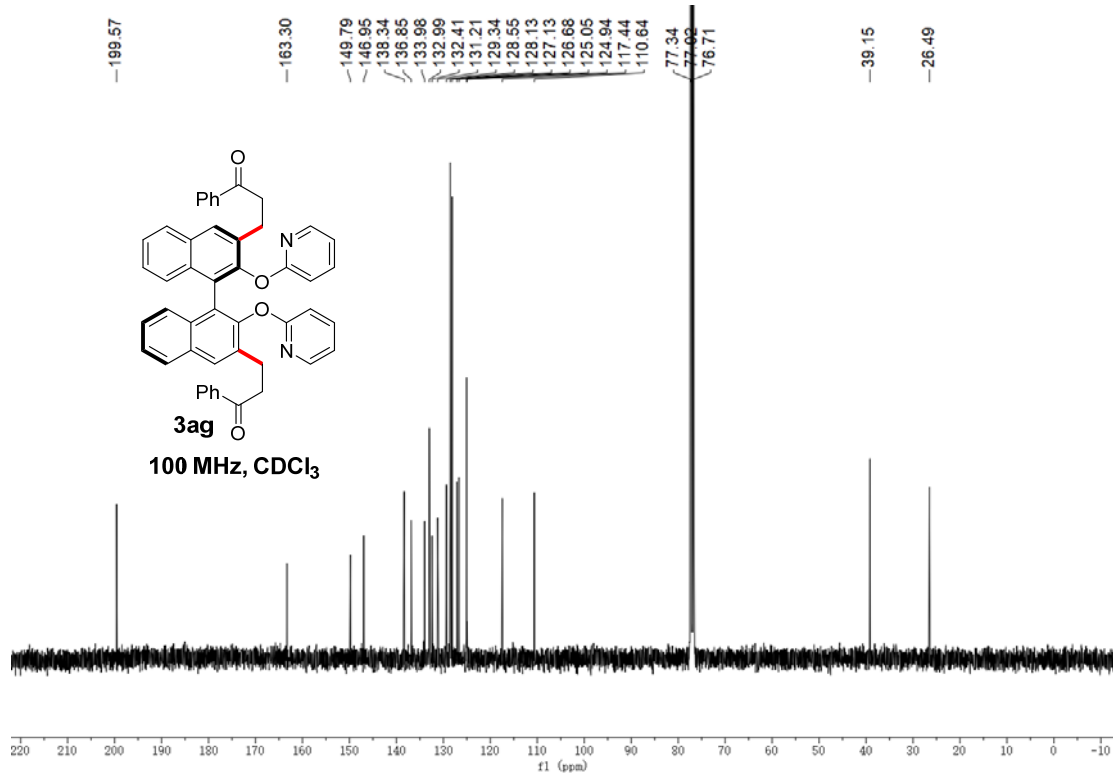

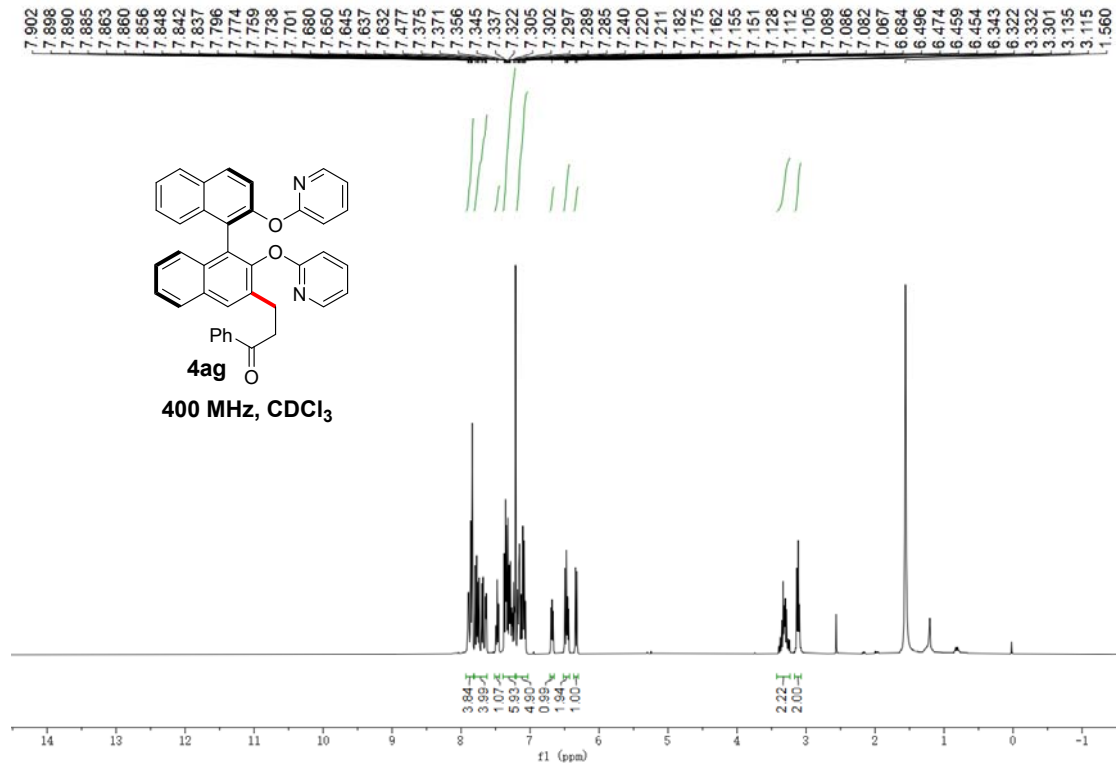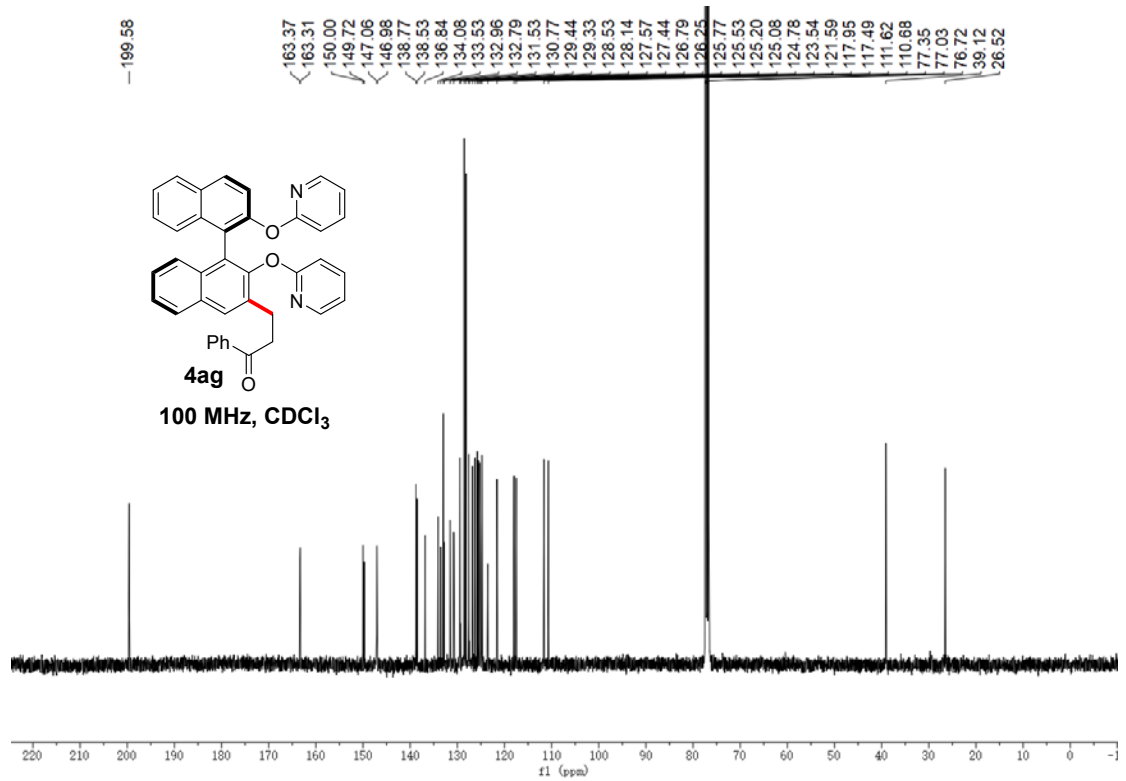

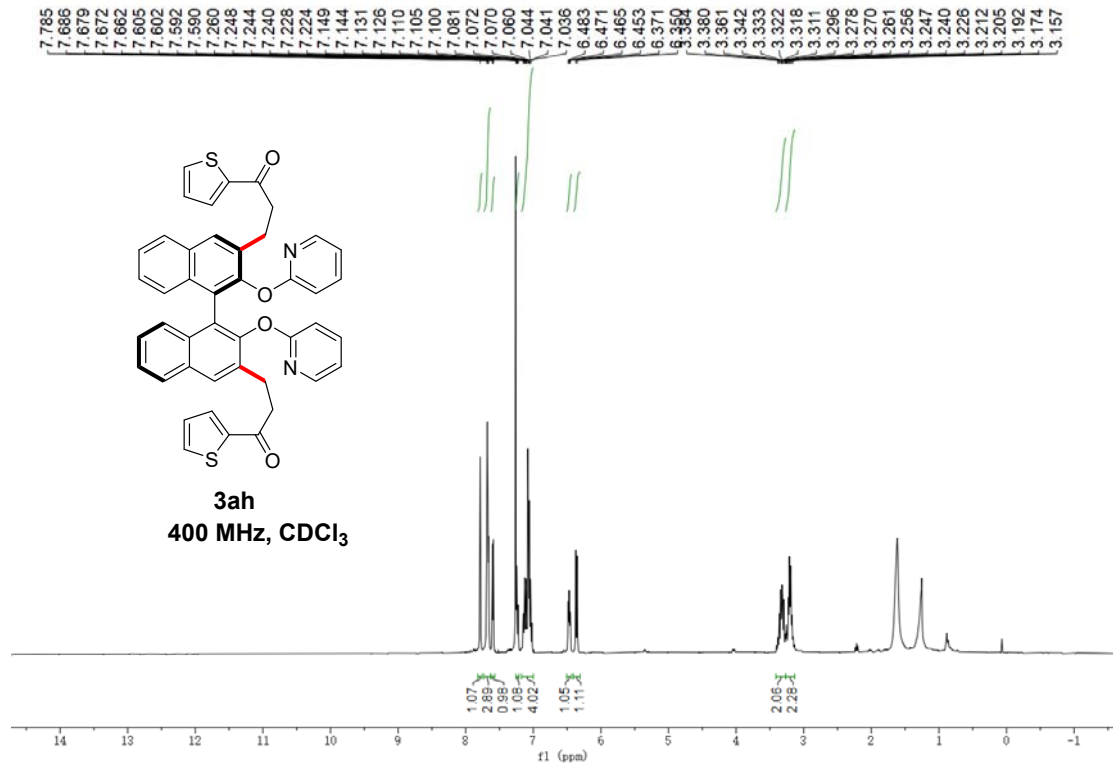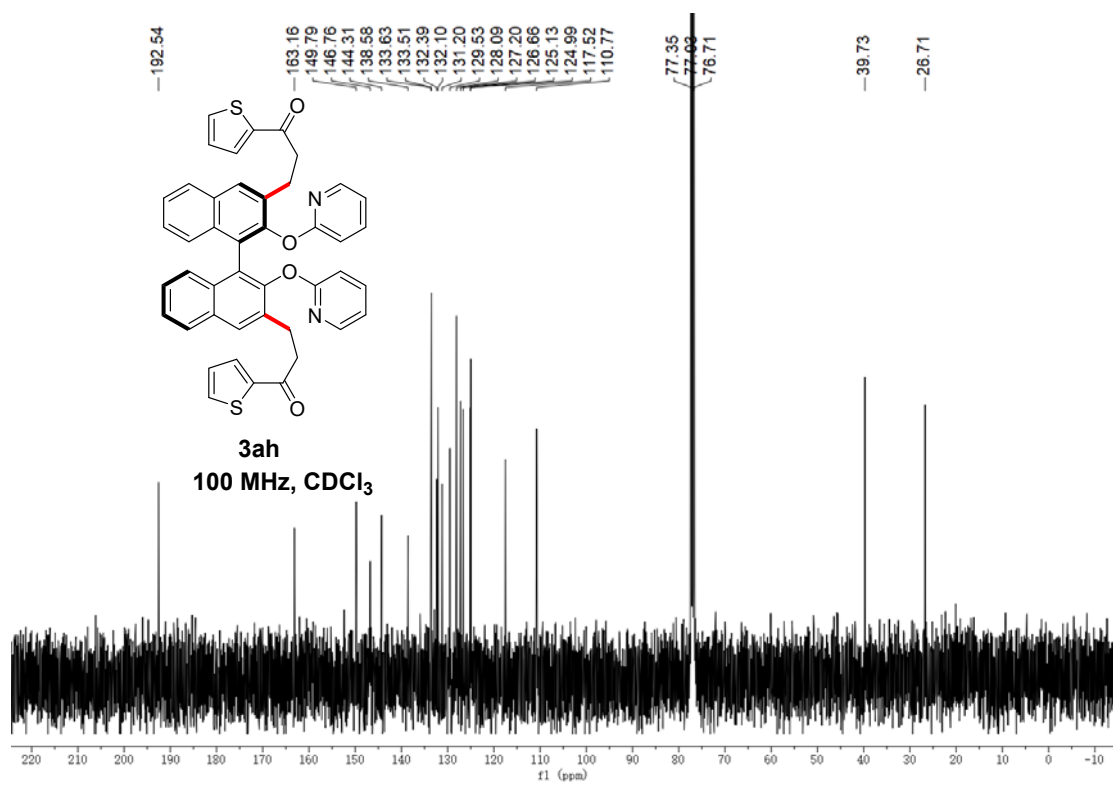

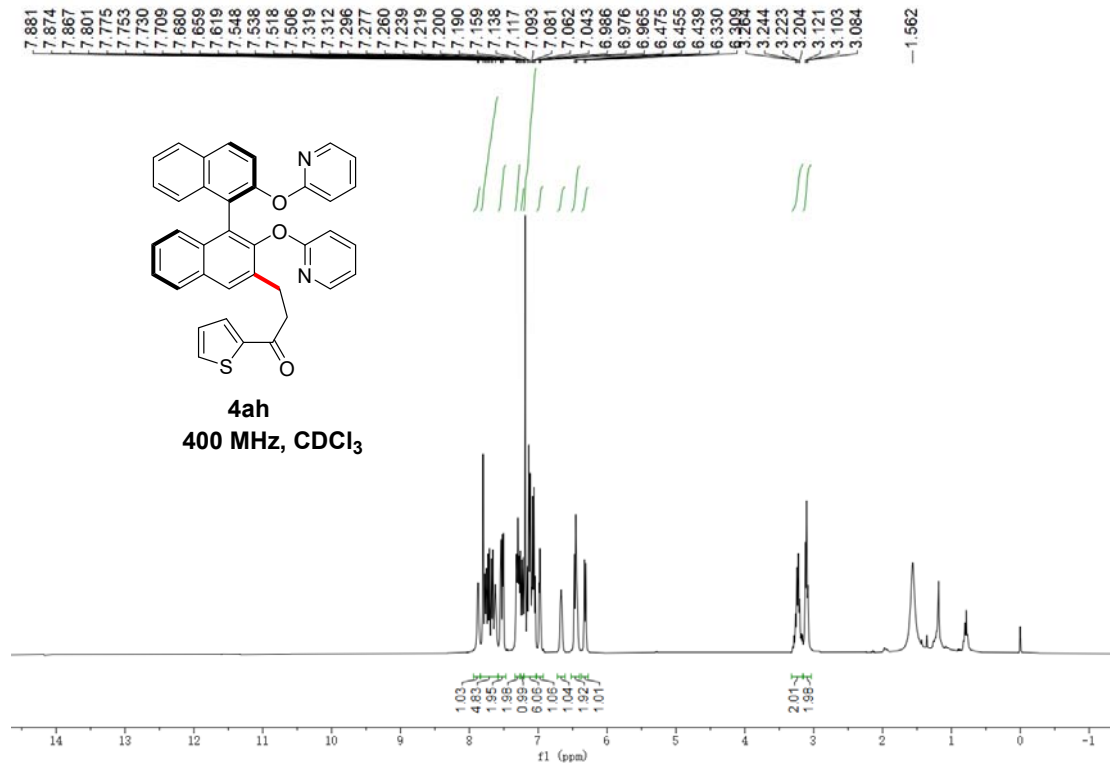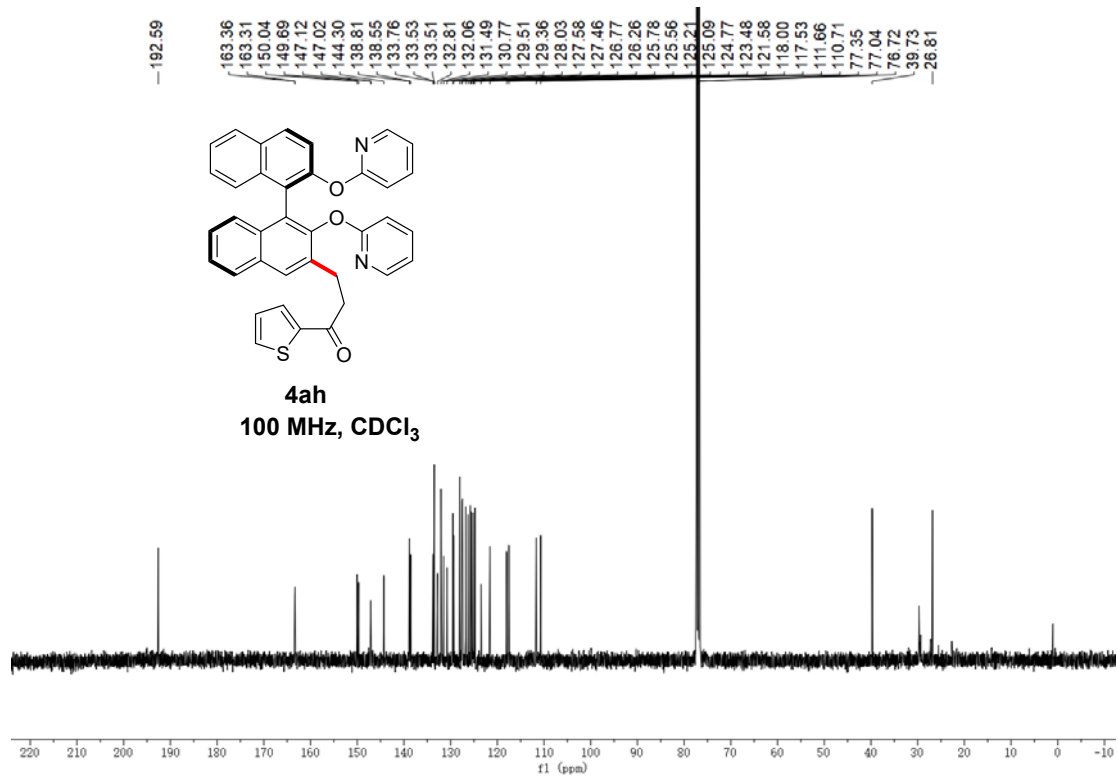

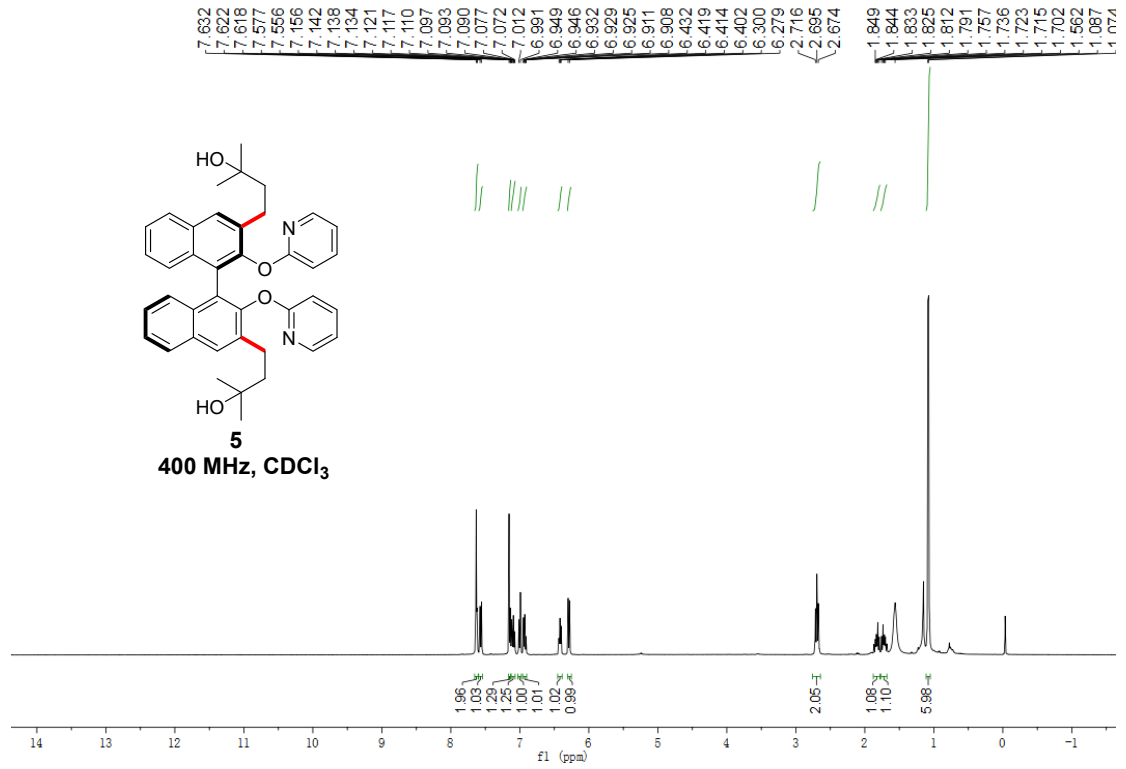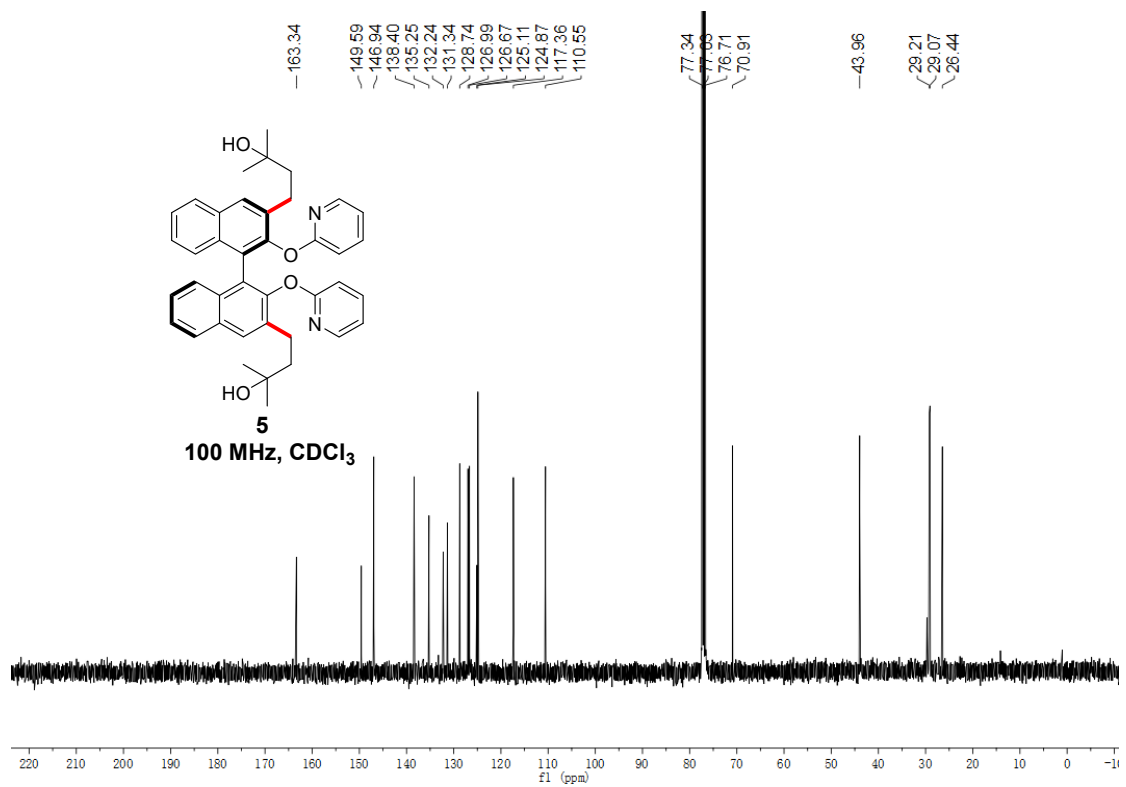

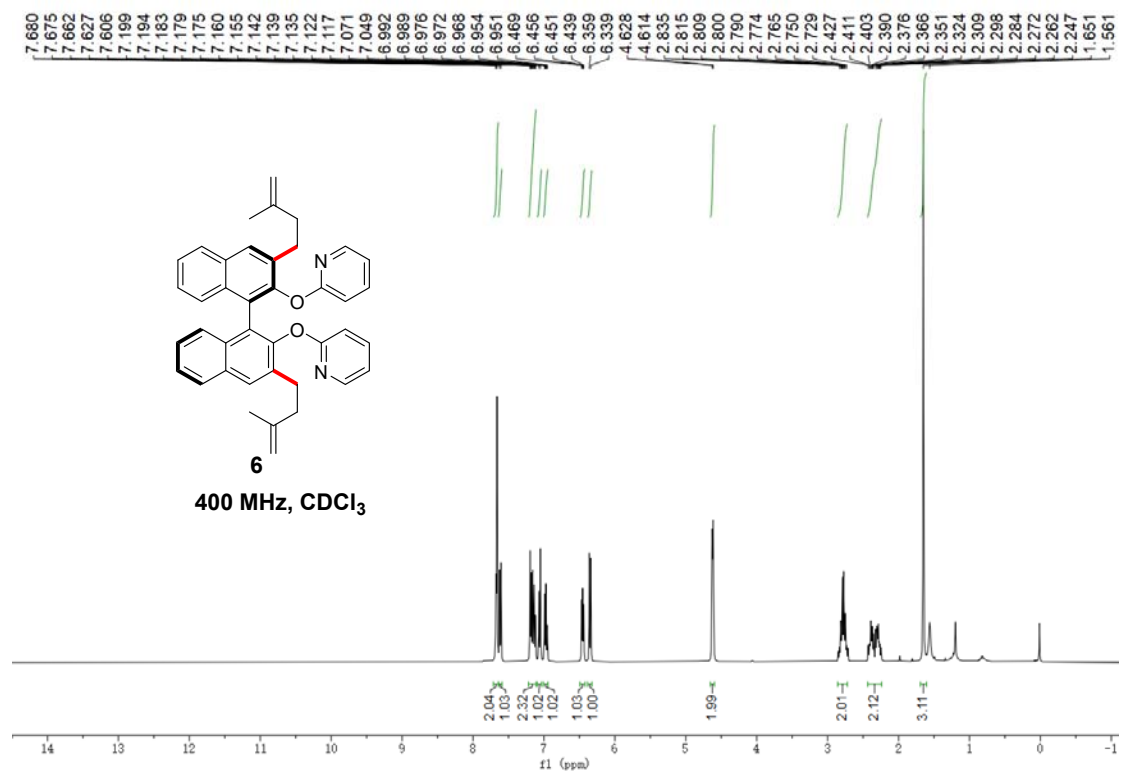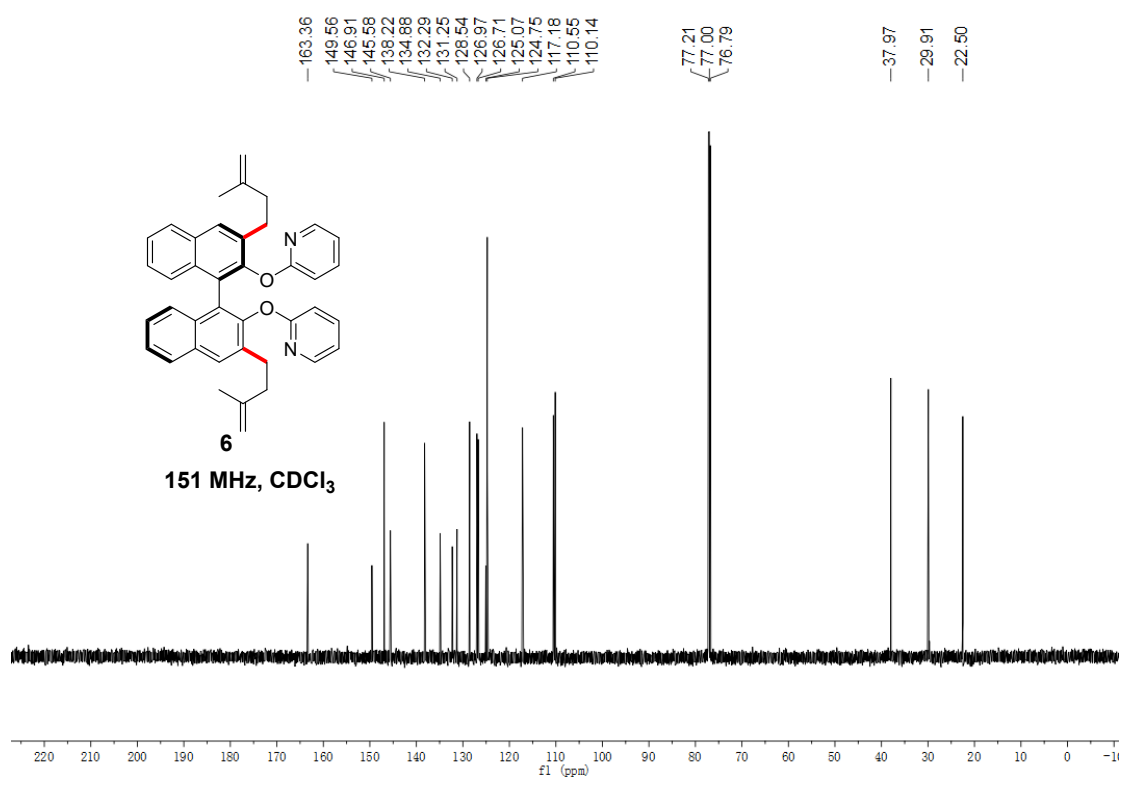

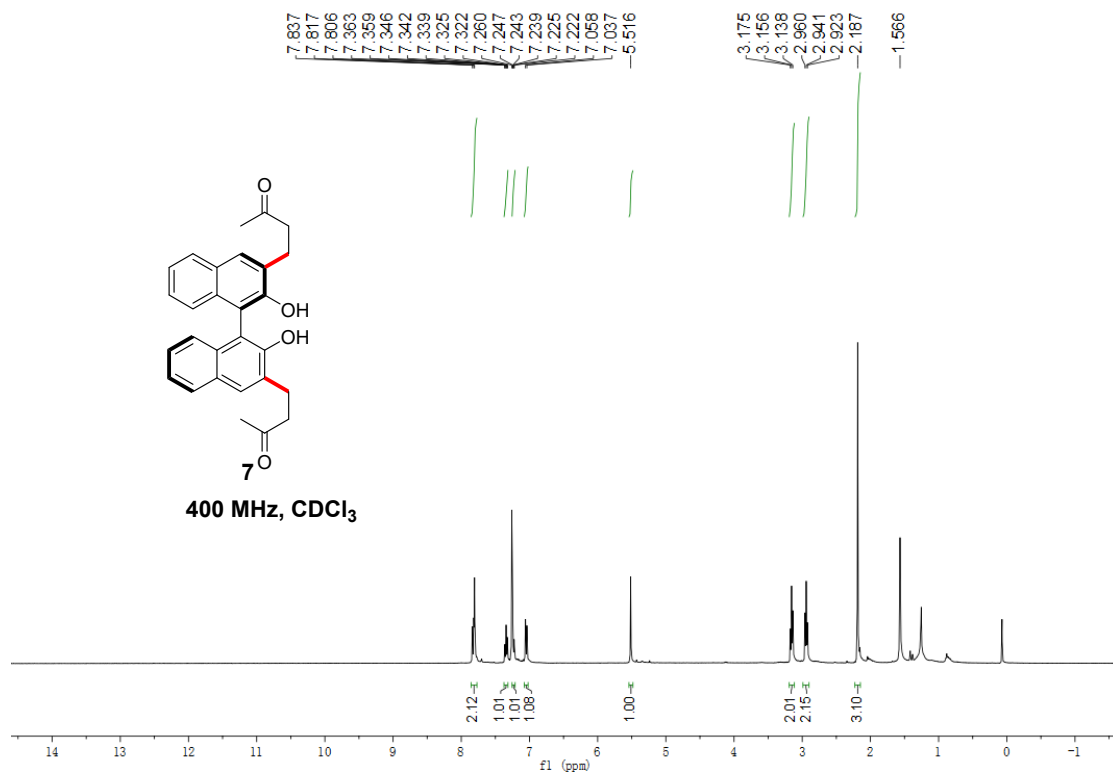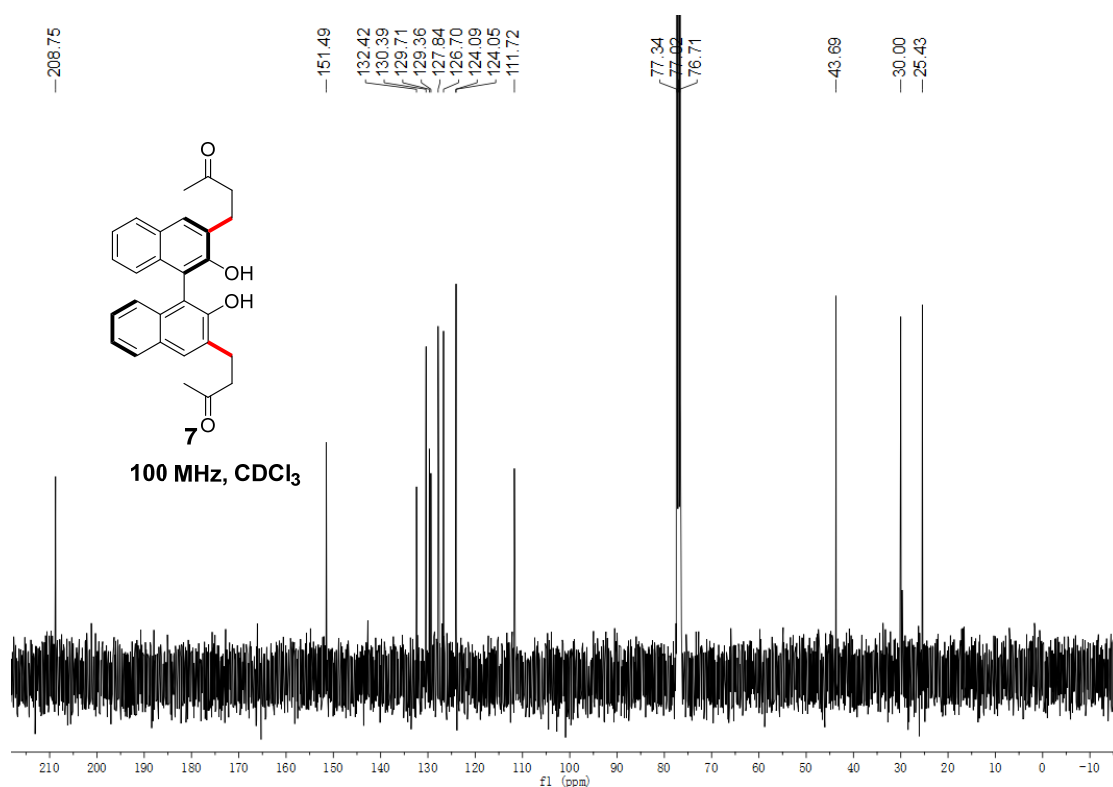



## 13. HPLC Data

### Rac-1a

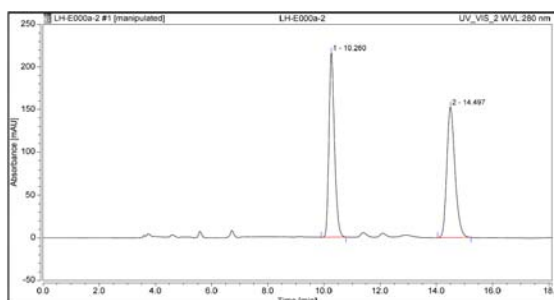

| No | Retention Time<br>min | Area<br>mAU*min | Height<br>mAU | Relative Area<br>% |
|----|-----------------------|-----------------|---------------|--------------------|
| 1  | 10.260                | 49.347          | 215.848       | 48.94              |
| 2  | 14.497                | 51.489          | 152.655       | 51.06              |

### Asy-1a

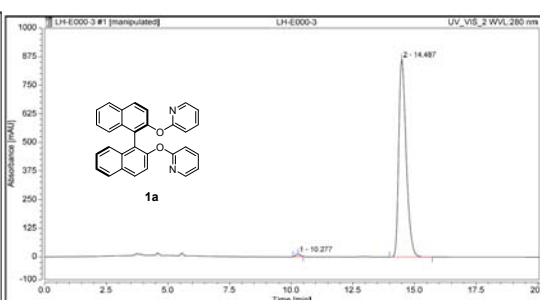

| No | Retention Time<br>min | Area<br>mAU*min | Height<br>mAU | Relative Area<br>% |
|----|-----------------------|-----------------|---------------|--------------------|
| 1  | 10.277                | 2.366           | 11.632        | 0.78               |
| 2  | 14.487                | 300.943         | 864.178       | 99.22              |

### Rac-3aa

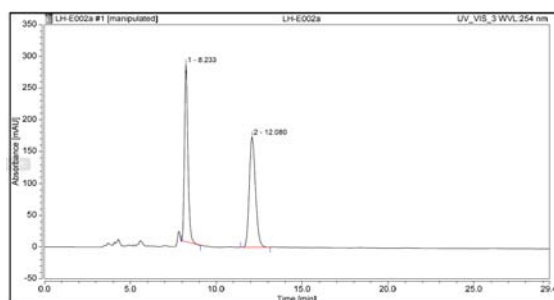

| No | Retention Time<br>min | Area<br>mAU*min | Height<br>mAU | Relative Area<br>% |
|----|-----------------------|-----------------|---------------|--------------------|
| 1  | 8.233                 | 64.305          | 278.533       | 47.02              |
| 2  | 12.080                | 72.469          | 173.244       | 52.98              |

### Asy-3aa

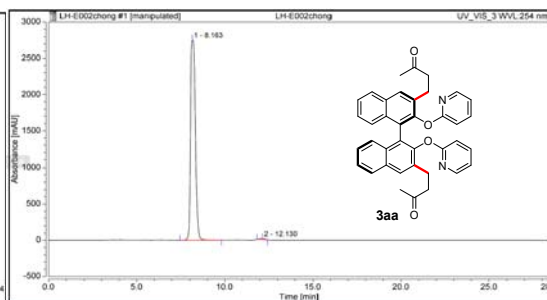

| No | Retention Time<br>min | Area<br>mAU*min | Height<br>mAU | Relative Area<br>% |
|----|-----------------------|-----------------|---------------|--------------------|
| 1  | 8.163                 | 864.536         | 2754.466      | 99.41              |
| 2  | 12.130                | 5.101           | 14.648        | 0.59               |

**Rac-4aa**

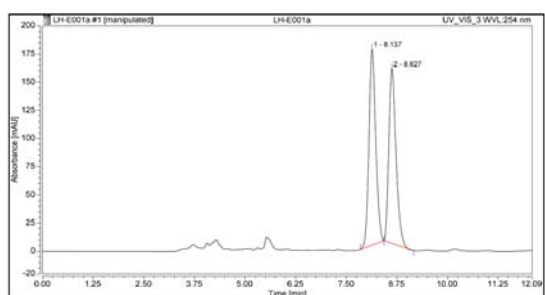

| No | Retention Time<br>min | Area<br>mAU*min | Height<br>mAU | Relative Area<br>% |
|----|-----------------------|-----------------|---------------|--------------------|
| 1  | 8.137                 | 33.825          | 173.936       | 51.45              |
| 2  | 8.627                 | 31.918          | 155.027       | 48.55              |

**Asy-4aa**

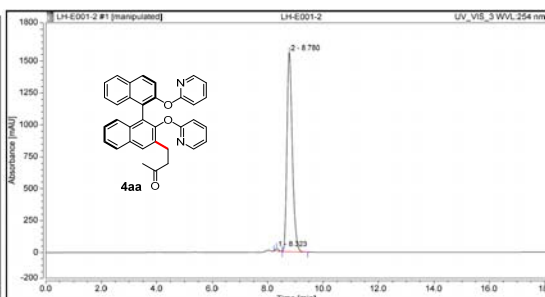

| No | Retention Time<br>min | Area<br>mAU*min | Height<br>mAU | Relative Area<br>% |
|----|-----------------------|-----------------|---------------|--------------------|
| 1  | 8.323                 | 2.819           | 19.262        | 0.80               |
| 2  | 8.780                 | 349.132         | 1559.241      | 99.20              |

**Rac-3ba**

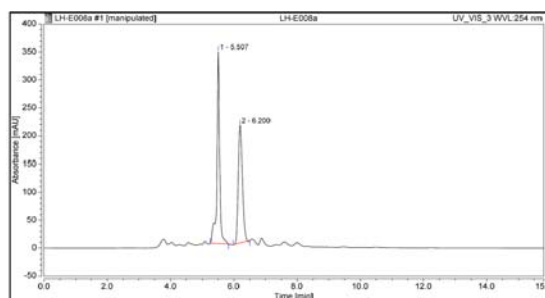

| No | Retention Time<br>min | Area<br>mAU*min | Height<br>mAU | Relative Area<br>% |
|----|-----------------------|-----------------|---------------|--------------------|
| 1  | 5.507                 | 34.270          | 342.732       | 52.19              |
| 2  | 6.200                 | 31.397          | 209.619       | 47.81              |

**Asy-3ba**

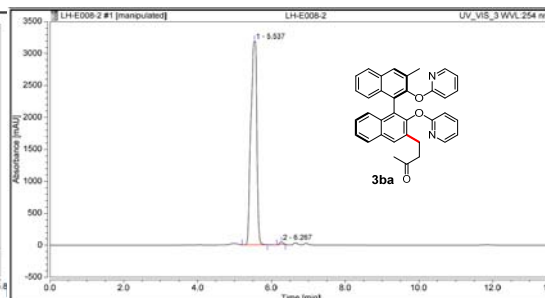

| No | Retention Time<br>min | Area<br>mAU*min | Height<br>mAU | Relative Area<br>% |
|----|-----------------------|-----------------|---------------|--------------------|
| 1  | 5.537                 | 594.152         | 3186.604      | 99.28              |
| 2  | 6.267                 | 4.285           | 37.684        | 0.72               |

**Rac-3ca**

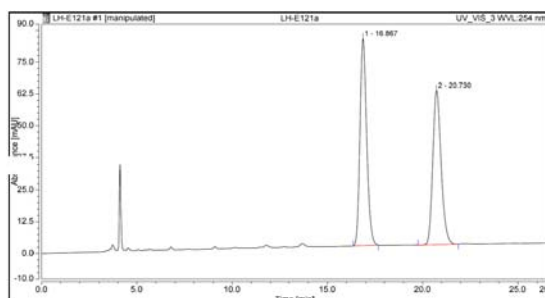

| No | Retention Time<br>min | Area<br>mAU*min | Height<br>mAU | Relative Area<br>% |
|----|-----------------------|-----------------|---------------|--------------------|
| 1  | 16.867                | 33.211          | 81.340        | 52.27              |
| 2  | 20.730                | 30.320          | 60.536        | 47.73              |

**Asy-3ca**

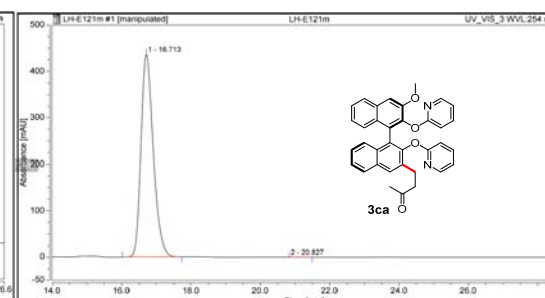

| No | Retention Time<br>min | Area<br>mAU*min | Height<br>mAU | Relative Area<br>% |
|----|-----------------------|-----------------|---------------|--------------------|
| 1  | 16.713                | 178.786         | 437.173       | 99.99              |
| 2  | 20.827                | 0.022           | 0.000         | 0.01               |

### Rac-3da

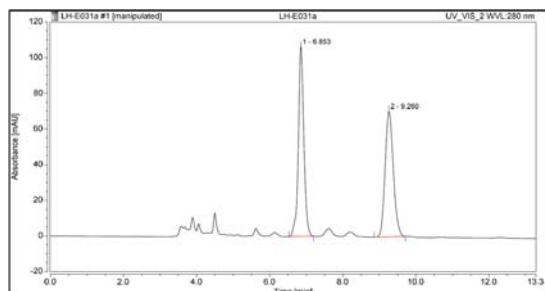

| No | Retention Time<br>min | Area<br>mAU*min | Height<br>mAU | Relative Area<br>% |
|----|-----------------------|-----------------|---------------|--------------------|
| 1  | 6.853                 | 18.441          | 106.578       | 50.27              |
| 2  | 9.260                 | 18.242          | 70.564        | 49.73              |

### Asy-3da

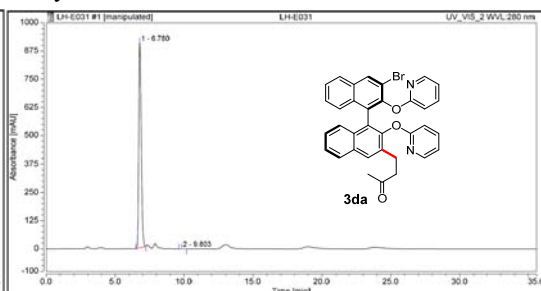

| No | Retention Time<br>min | Area<br>mAU*min | Height<br>mAU | Relative Area<br>% |
|----|-----------------------|-----------------|---------------|--------------------|
| 1  | 6.780                 | 186.688         | 906.098       | 99.99              |
| 2  | 9.803                 | 0.012           | 0.044         | 0.01               |

### Rac-3ea

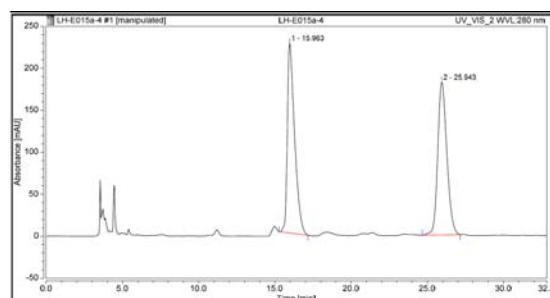

| No | Retention Time<br>min | Area<br>mAU*min | Height<br>mAU | Relative Area<br>% |
|----|-----------------------|-----------------|---------------|--------------------|
| 1  | 15.963                | 124.121         | 226.322       | 49.66              |
| 2  | 25.943                | 125.844         | 182.178       | 50.34              |

### Asy-3ea

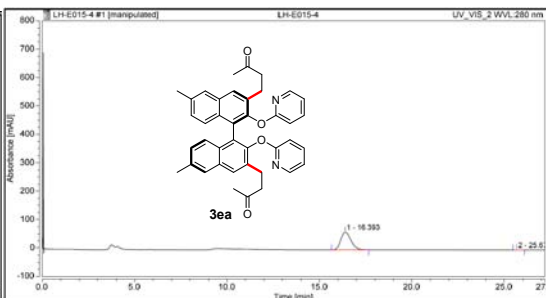

| No | Retention Time<br>min | Area<br>mAU*min | Height<br>mAU | Relative Area<br>% |
|----|-----------------------|-----------------|---------------|--------------------|
| 1  | 16.393                | 39.670          | 62.432        | 99.99              |
| 2  | 25.670                | 0.003           | 0.023         | 0.01               |

### Rac-1f

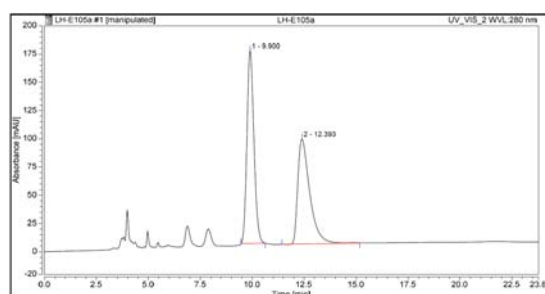

| No | Retention Time<br>min | Area<br>mAU*min | Height<br>mAU | Relative Area<br>% |
|----|-----------------------|-----------------|---------------|--------------------|
| 1  | 9.900                 | 66.336          | 170.694       | 51.87              |
| 2  | 12.393                | 61.543          | 93.012        | 48.13              |

### Asy-1f

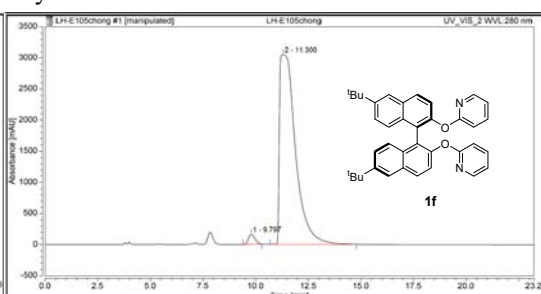

| No | Retention Time<br>min | Area<br>mAU*min | Height<br>mAU | Relative Area<br>% |
|----|-----------------------|-----------------|---------------|--------------------|
| 1  | 9.797                 | 58.135          | 162.382       | 2.13               |
| 2  | 11.300                | 2670.888        | 3049.021      | 97.87              |

**Rac-3fa**

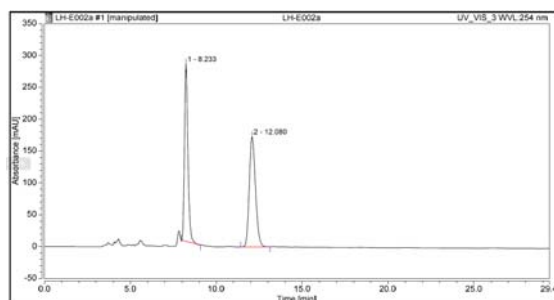

| No | Retention Time<br>min | Area<br>mAU*min | Height<br>mAU | Relative Area<br>% |
|----|-----------------------|-----------------|---------------|--------------------|
| 1  | 8.483                 | 31.695          | 119.057       | 50.06              |
| 2  | 9.743                 | 31.623          | 94.800        | 49.94              |

**Asy-3fa**

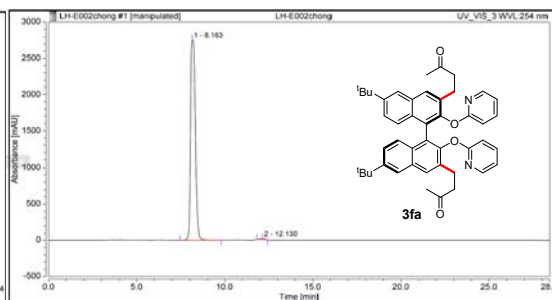

| No | Retention Time<br>min | Area<br>mAU*min | Height<br>mAU | Relative Area<br>% |
|----|-----------------------|-----------------|---------------|--------------------|
| 1  | 7.873                 | 2.270           | 11.036        | 2.23               |
| 2  | 9.347                 | 99.754          | 364.822       | 97.77              |

**Rac-3ga**

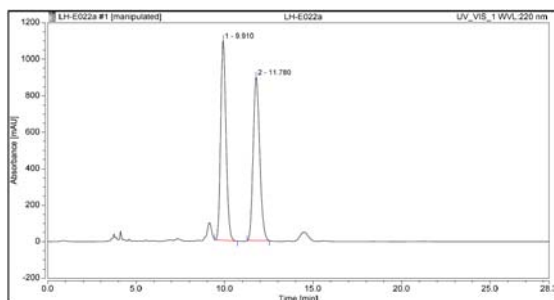

| No | Retention Time<br>min | Area<br>mAU*min | Height<br>mAU | Relative Area<br>% |
|----|-----------------------|-----------------|---------------|--------------------|
| 1  | 9.910                 | 383.717         | 1095.335      | 50.01              |
| 2  | 11.780                | 383.627         | 895.634       | 49.99              |

**Asy-3ga**

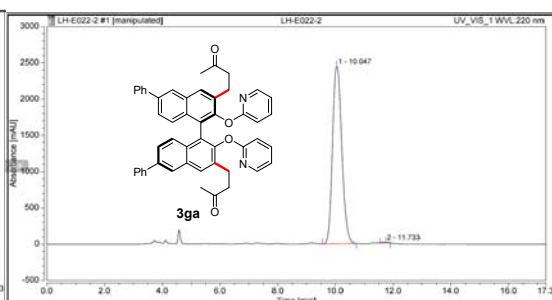

| No | Retention Time<br>min | Area<br>mAU*min | Height<br>mAU | Relative Area<br>% |
|----|-----------------------|-----------------|---------------|--------------------|
| 1  | 10.047                | 910.223         | 2447.553      | 99.78              |
| 2  | 11.733                | 2.046           | 9.258         | 0.22               |

**Rac-3ha**

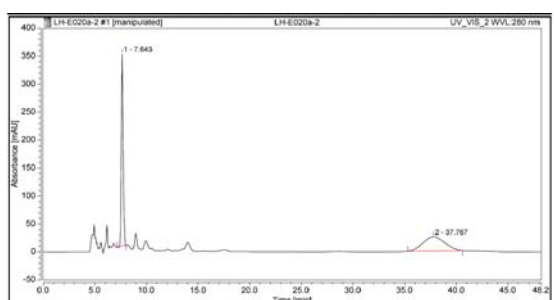

| No | Retention Time<br>min | Area<br>mAU*min | Height<br>mAU | Relative Area<br>% |
|----|-----------------------|-----------------|---------------|--------------------|
| 1  | 7.643                 | 68.539          | 343.057       | 52.98              |
| 2  | 37.767                | 60.833          | 24.819        | 47.02              |

**Asy-3ha**

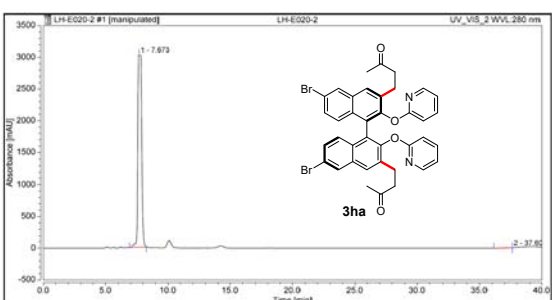

| No | Retention Time<br>min | Area<br>mAU*min | Height<br>mAU | Relative Area<br>% |
|----|-----------------------|-----------------|---------------|--------------------|
| 1  | 7.673                 | 1079.490        | 3026.522      | 99.81              |
| 2  | 37.607                | 2.066           | 0.000         | 0.19               |

### Rac-4ha

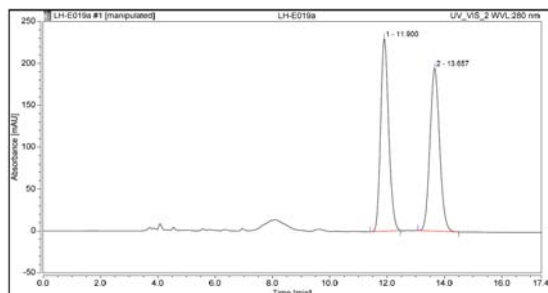

| No | Retention Time<br>min | Area<br>mAU*min | Height<br>mAU | Relative Area<br>% |
|----|-----------------------|-----------------|---------------|--------------------|
| 1  | 11.900                | 75.123          | 229.882       | 49.88              |
| 2  | 13.657                | 75.478          | 194.508       | 50.12              |

### Asy-4ha

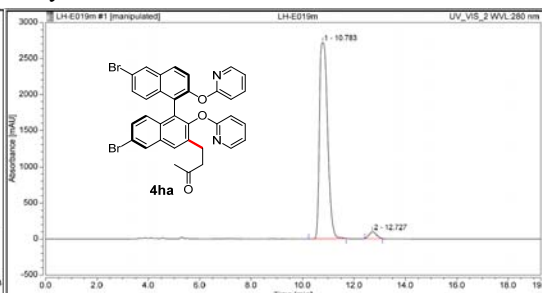

| No | Retention Time<br>min | Area<br>mAU*min | Height<br>mAU | Relative Area<br>% |
|----|-----------------------|-----------------|---------------|--------------------|
| 1  | 10.783                | 993.084         | 2717.435      | 97.10              |
| 2  | 12.727                | 29.636          | 91.712        | 2.90               |

### Rac-4ia

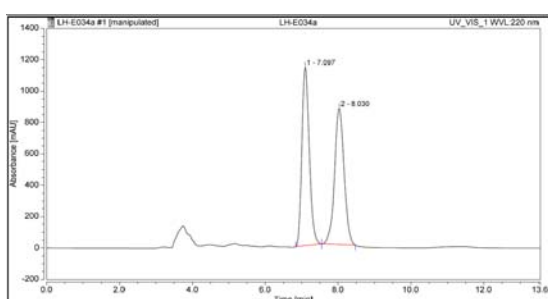

| No | Retention Time<br>min | Area<br>mAU*min | Height<br>mAU | Relative Area<br>% |
|----|-----------------------|-----------------|---------------|--------------------|
| 1  | 7.097                 | 266.669         | 1136.483      | 50.34              |
| 2  | 8.030                 | 263.042         | 867.487       | 49.66              |

### Asy-4ia

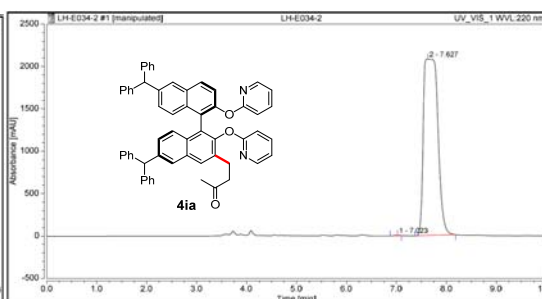

| No | Retention Time<br>min | Area<br>mAU*min | Height<br>mAU | Relative Area<br>% |
|----|-----------------------|-----------------|---------------|--------------------|
| 1  | 7.023                 | 0.526           | 4.415         | 0.08               |
| 2  | 7.627                 | 693.872         | 2082.389      | 99.92              |

### Rac-3ka

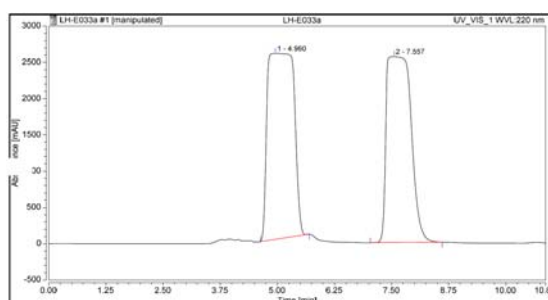

| No | Retention Time<br>min | Area<br>mAU*min | Height<br>mAU | Relative Area<br>% |
|----|-----------------------|-----------------|---------------|--------------------|
| 1  | 4.960                 | 1711.762        | 2565.564      | 51.74              |
| 2  | 7.557                 | 1596.436        | 2566.282      | 48.26              |

### Asy-3ka

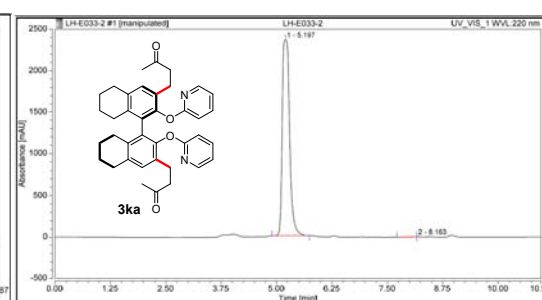

| No | Retention Time<br>min | Area<br>mAU*min | Height<br>mAU | Relative Area<br>% |
|----|-----------------------|-----------------|---------------|--------------------|
| 1  | 5.197                 | 452.671         | 2358.789      | 99.89              |
| 2  | 8.163                 | 0.499           | 0.000         | 0.11               |

### Rac-3la

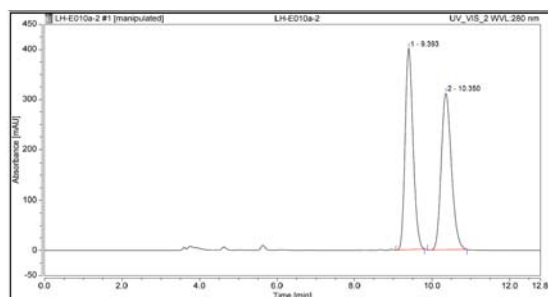

| No | Retention Time<br>min | Area<br>mAU*min | Height<br>mAU | Relative Area<br>% |
|----|-----------------------|-----------------|---------------|--------------------|
| 1  | 9.393                 | 94.954          | 400.320       | 50.02              |
| 2  | 10.350                | 94.874          | 311.302       | 49.98              |

### Asy-3la

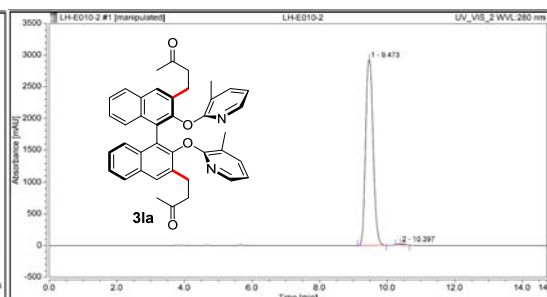

| No | Retention Time<br>min | Area<br>mAU*min | Height<br>mAU | Relative Area<br>% |
|----|-----------------------|-----------------|---------------|--------------------|
| 1  | 9.473                 | 755.982         | 2927.992      | 99.54              |
| 2  | 10.397                | 3.500           | 16.141        | 0.46               |

### Rac-4la

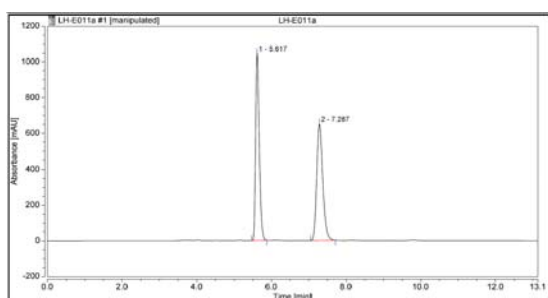

| No | Retention Time<br>min | Area<br>mAU*min | Height<br>mAU | Relative Area<br>% |
|----|-----------------------|-----------------|---------------|--------------------|
| 1  | 5.617                 | 117.316         | 1044.547      | 49.17              |
| 2  | 7.287                 | 121.261         | 650.512       | 50.83              |

### Asy-4la

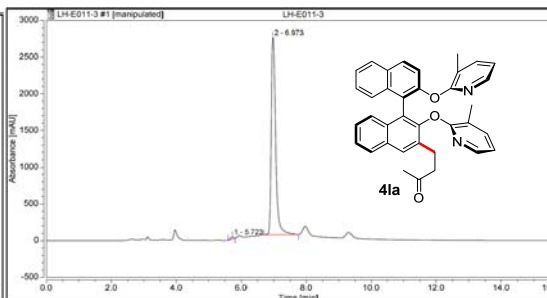

| No | Retention Time<br>min | Area<br>mAU*min | Height<br>mAU | Relative Area<br>% |
|----|-----------------------|-----------------|---------------|--------------------|
| 1  | 5.723                 | 3.037           | 30.233        | 0.72               |
| 2  | 6.973                 | 421.185         | 2687.316      | 99.28              |

### Rac-3ma

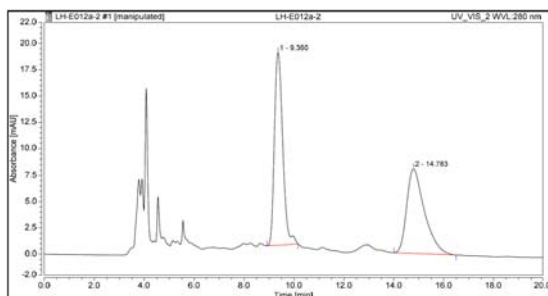

| No | Retention Time<br>min | Area<br>mAU*min | Height<br>mAU | Relative Area<br>% |
|----|-----------------------|-----------------|---------------|--------------------|
| 1  | 9.360                 | 7.108           | 18.310        | 51.77              |
| 2  | 14.783                | 6.622           | 8.084         | 48.23              |

### Asy-3ma

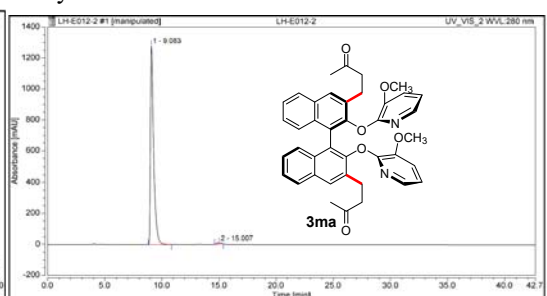

| No | Retention Time<br>min | Area<br>mAU*min | Height<br>mAU | Relative Area<br>% |
|----|-----------------------|-----------------|---------------|--------------------|
| 1  | 9.083                 | 410.830         | 1283.698      | 99.05              |
| 2  | 15.007                | 3.925           | 8.682         | 0.95               |

**Rac-4ma**

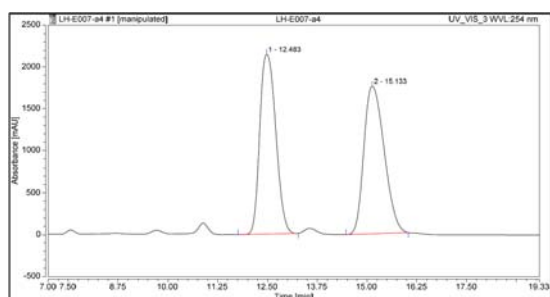

| No | Retention Time<br>min | Area<br>mAU*min | Height<br>mAU | Relative Area<br>% |
|----|-----------------------|-----------------|---------------|--------------------|
| 1  | 8.780                 | 11.459          | 49.439        | 51.93              |
| 2  | 13.270                | 10.606          | 31.919        | 48.07              |

**Asy-4ma**

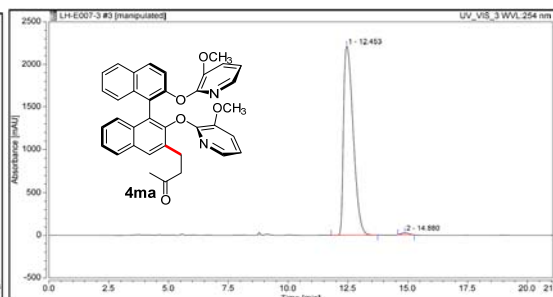

| No | Retention Time<br>min | Area<br>mAU*min | Height<br>mAU | Relative Area<br>% |
|----|-----------------------|-----------------|---------------|--------------------|
| 1  | 8.643                 | 0.899           | 4.082         | 0.42               |
| 2  | 13.457                | 215.050         | 595.010       | 99.58              |

**Rac-3na**

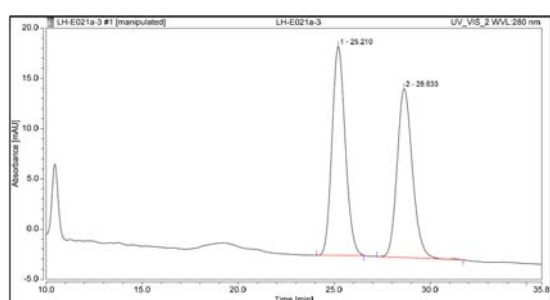

| No | Retention Time<br>min | Area<br>mAU*min | Height<br>mAU | Relative Area<br>% |
|----|-----------------------|-----------------|---------------|--------------------|
| 1  | 25.210                | 16.648          | 20.802        | 51.85              |
| 2  | 28.633                | 15.458          | 16.811        | 48.15              |

**Asy-3na**

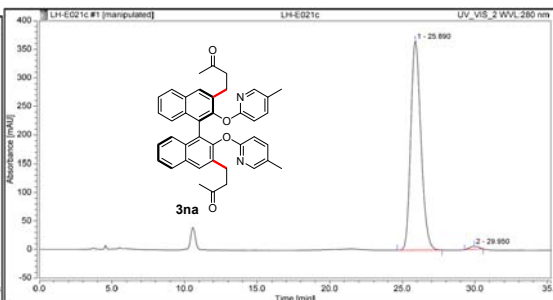

| No | Retention Time<br>min | Area<br>mAU*min | Height<br>mAU | Relative Area<br>% |
|----|-----------------------|-----------------|---------------|--------------------|
| 1  | 25.890                | 298.101         | 365.512       | 98.77              |
| 2  | 29.950                | 3.724           | 5.202         | 1.23               |

**Rac-1o**

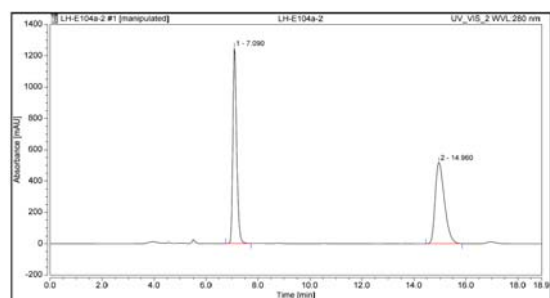

| No | Retention Time<br>min | Area<br>mAU*min | Height<br>mAU | Relative Area<br>% |
|----|-----------------------|-----------------|---------------|--------------------|
| 1  | 7.090                 | 212.903         | 1248.124      | 50.02              |
| 2  | 14.960                | 212.733         | 519.510       | 49.98              |

**Asy-1o**

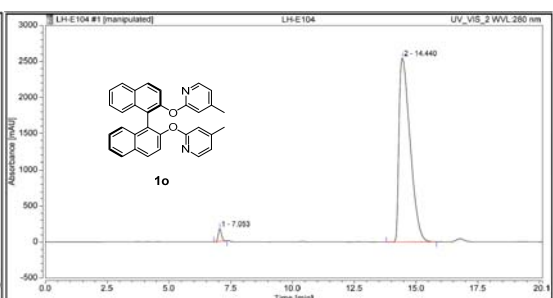

| No | Retention Time<br>min | Area<br>mAU*min | Height<br>mAU | Relative Area<br>% |
|----|-----------------------|-----------------|---------------|--------------------|
| 1  | 7.053                 | 25.871          | 176.270       | 1.91               |
| 2  | 14.440                | 1326.433        | 2545.023      | 98.09              |

**Rac-3oa**

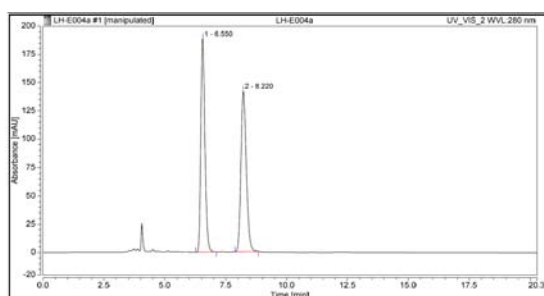

| No | Retention Time<br>min | Area<br>mAU*min | Height<br>mAU | Relative Area<br>% |
|----|-----------------------|-----------------|---------------|--------------------|
| 1  | 6.550                 | 36.346          | 188.797       | 49.93              |
| 2  | 8.220                 | 36.450          | 141.972       | 50.07              |

**Asy-3oa**

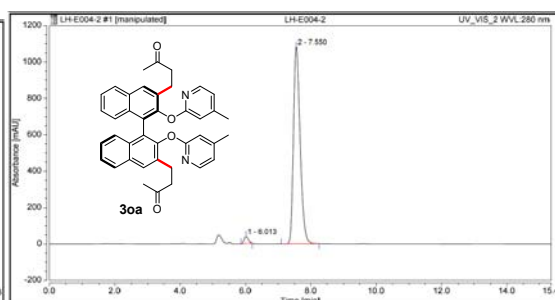

| No | Retention Time<br>min | Area<br>mAU*min | Height<br>mAU | Relative Area<br>% |
|----|-----------------------|-----------------|---------------|--------------------|
| 1  | 6.013                 | 5.901           | 39.519        | 2.26               |
| 2  | 7.550                 | 254.648         | 1082.558      | 97.74              |

**Rac-3pa**

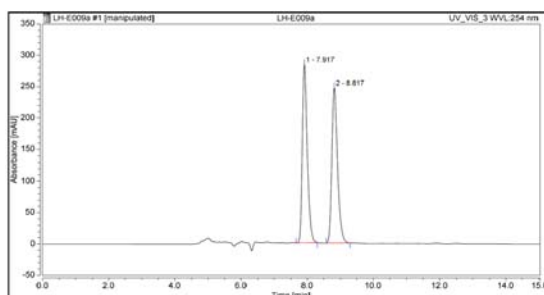

| No | Retention Time<br>min | Area<br>mAU*min | Height<br>mAU | Relative Area<br>% |
|----|-----------------------|-----------------|---------------|--------------------|
| 1  | 7.917                 | 49.033          | 283.681       | 50.16              |
| 2  | 8.817                 | 48.715          | 246.751       | 49.84              |

**Asy-3pa**

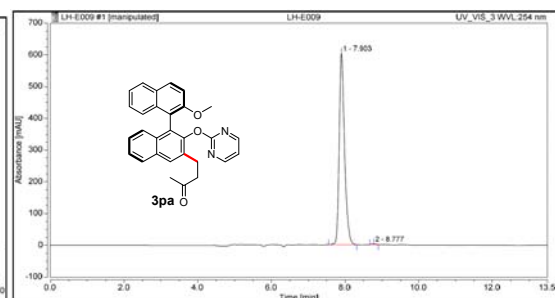

| No | Retention Time<br>min | Area<br>mAU*min | Height<br>mAU | Relative Area<br>% |
|----|-----------------------|-----------------|---------------|--------------------|
| 1  | 7.903                 | 101.275         | 603.508       | 99.71              |
| 2  | 8.777                 | 0.295           | 2.304         | 0.29               |

**Rac-3qa**

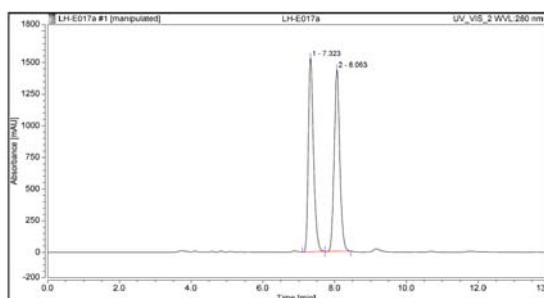

| No | Retention Time<br>min | Area<br>mAU*min | Height<br>mAU | Relative Area<br>% |
|----|-----------------------|-----------------|---------------|--------------------|
| 1  | 7.323                 | 254.611         | 1531.746      | 49.59              |
| 2  | 8.063                 | 258.797         | 1437.644      | 50.41              |

**Asy-3qa**

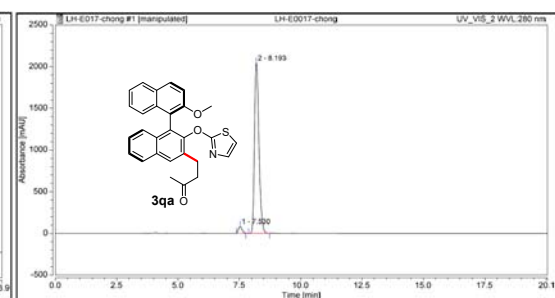

| No | Retention Time<br>min | Area<br>mAU*min | Height<br>mAU | Relative Area<br>% |
|----|-----------------------|-----------------|---------------|--------------------|
| 1  | 7.530                 | 13.843          | 84.192        | 3.12               |
| 2  | 8.193                 | 429.933         | 2046.831      | 96.88              |



### Rac-3ab

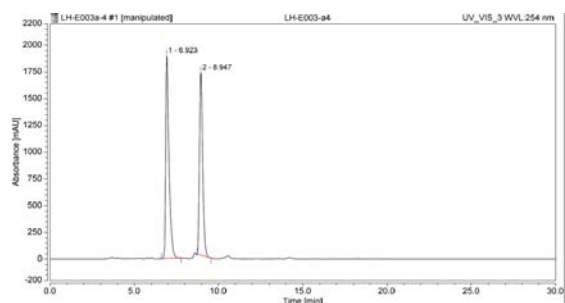

| No | Retention Time<br>min | Area<br>mAU*min | Height<br>mAU | Relative Area<br>% |
|----|-----------------------|-----------------|---------------|--------------------|
| 1  | 6.923                 | 423.186         | 1903.064      | 52.77              |
| 2  | 8.947                 | 378.805         | 1710.434      | 47.23              |

### Asy-3ab

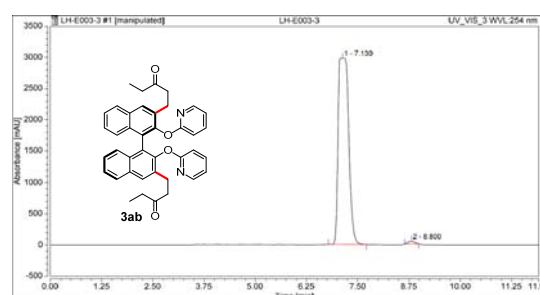

| No | Retention Time<br>min | Area<br>mAU*min | Height<br>mAU | Relative Area<br>% |
|----|-----------------------|-----------------|---------------|--------------------|
| 1  | 7.130                 | 882.932         | 2981.227      | 99.09              |
| 2  | 8.800                 | 8.091           | 41.530        | 0.91               |

### Rac-3ac

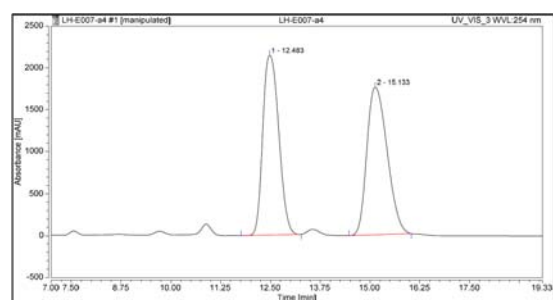

| No | Retention Time<br>min | Area<br>mAU*min | Height<br>mAU | Relative Area<br>% |
|----|-----------------------|-----------------|---------------|--------------------|
| 1  | 12.483                | 994.542         | 2144.577      | 48.95              |
| 2  | 15.133                | 1037.009        | 1759.879      | 51.05              |

### Asy-3ac

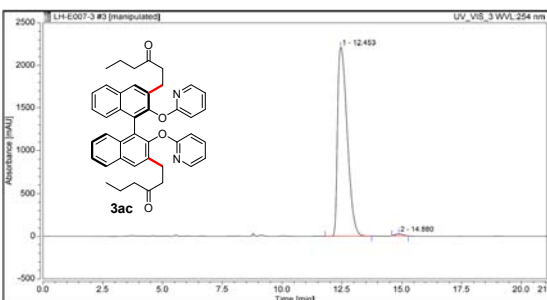

| No | Retention Time<br>min | Area<br>mAU*min | Height<br>mAU | Relative Area<br>% |
|----|-----------------------|-----------------|---------------|--------------------|
| 1  | 12.453                | 1030.139        | 2210.899      | 99.20              |
| 2  | 14.880                | 8.302           | 22.580        | 0.80               |

### Rac-3ad

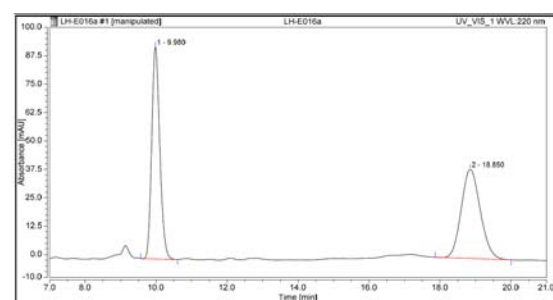

| No | Retention Time<br>min | Area<br>mAU*min | Height<br>mAU | Relative Area<br>% |
|----|-----------------------|-----------------|---------------|--------------------|
| 1  | 9.980                 | 24.565          | 93.327        | 50.23              |
| 2  | 18.850                | 24.336          | 39.240        | 49.77              |

### Asy-3ad

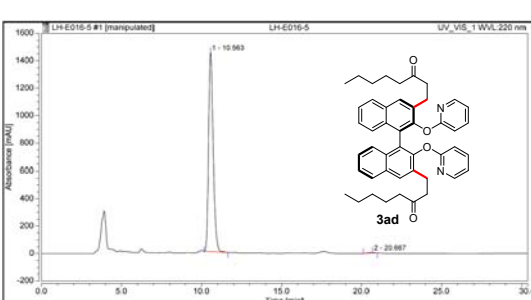

| No | Retention Time<br>min | Area<br>mAU*min | Height<br>mAU | Relative Area<br>% |
|----|-----------------------|-----------------|---------------|--------------------|
| 1  | 10.563                | 481.105         | 1447.121      | 99.57              |
| 2  | 20.667                | 2.082           | 4.424         | 0.43               |

**Rac-3ae**

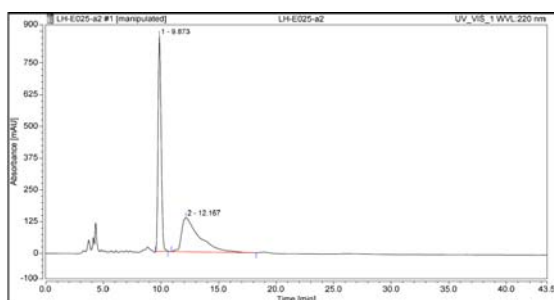

| No | Retention Time<br>min | Area<br>mAU*min | Height<br>mAU | Relative Area<br>% |
|----|-----------------------|-----------------|---------------|--------------------|
| 1  | 9.873                 | 259.290         | 847.873       | 51.98              |
| 2  | 12.167                | 239.536         | 134.408       | 48.02              |

**Asy-3ae**

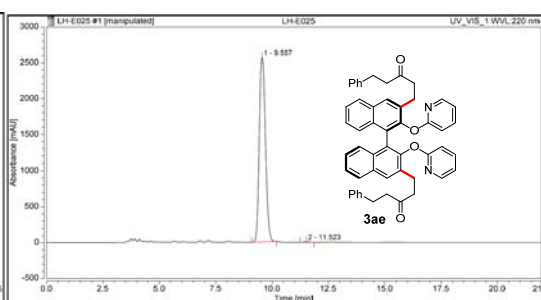

| No | Retention Time<br>min | Area<br>mAU*min | Height<br>mAU | Relative Area<br>% |
|----|-----------------------|-----------------|---------------|--------------------|
| 1  | 9.557                 | 811.434         | 2563.952      | 99.68              |
| 2  | 11.523                | 2.622           | 8.473         | 0.32               |

**Rac-3ag**

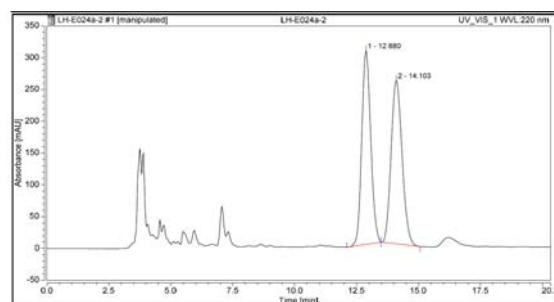

| No | Retention Time<br>min | Area<br>mAU*min | Height<br>mAU | Relative Area<br>% |
|----|-----------------------|-----------------|---------------|--------------------|
| 1  | 12.880                | 128.083         | 304.588       | 49.33              |
| 2  | 14.103                | 131.564         | 256.899       | 50.67              |

**Asy-3ag**

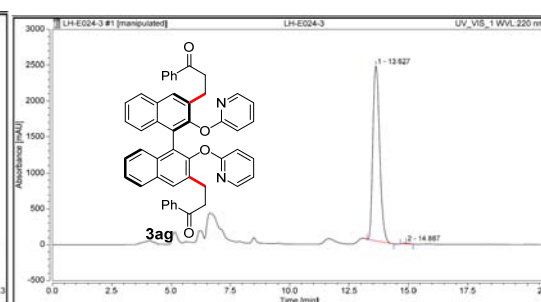

| No | Retention Time<br>min | Area<br>mAU*min | Height<br>mAU | Relative Area<br>% |
|----|-----------------------|-----------------|---------------|--------------------|
| 1  | 13.627                | 808.592         | 2434.920      | 99.56              |
| 2  | 14.887                | 3.593           | 10.849        | 0.44               |

**Rac-4ag**

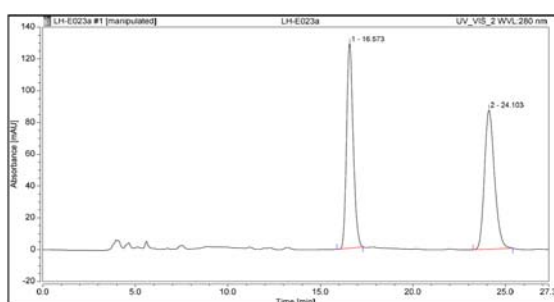

| No | Retention Time<br>min | Area<br>mAU*min | Height<br>mAU | Relative Area<br>% |
|----|-----------------------|-----------------|---------------|--------------------|
| 1  | 16.573                | 53.516          | 128.722       | 49.24              |
| 2  | 24.103                | 55.172          | 87.675        | 50.76              |

**Asy-4ag**

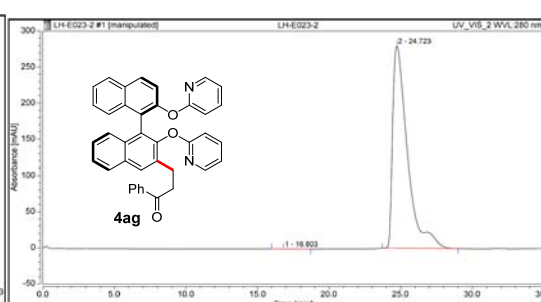

| No | Retention Time<br>min | Area<br>mAU*min | Height<br>mAU | Relative Area<br>% |
|----|-----------------------|-----------------|---------------|--------------------|
| 1  | 16.803                | 0.027           | 0.031         | 0.01               |
| 2  | 24.723                | 335.326         | 280.098       | 99.99              |

### Rac-3ah

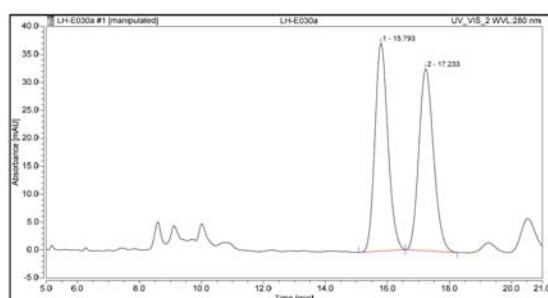

| No | Retention Time<br>min | Area<br>mAU*min | Height<br>mAU | Relative Area<br>% |
|----|-----------------------|-----------------|---------------|--------------------|
| 1  | 15.793                | 18.082          | 37.230        | 50.30              |
| 2  | 17.233                | 17.869          | 32.558        | 49.70              |

### Asy-3ah

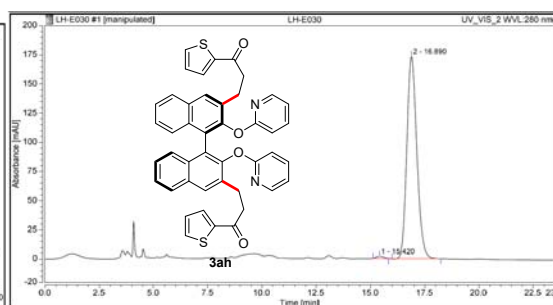

| No | Retention Time<br>min | Area<br>mAU*min | Height<br>mAU | Relative Area<br>% |
|----|-----------------------|-----------------|---------------|--------------------|
| 1  | 15.420                | 0.708           | 1.859         | 0.75               |
| 2  | 16.890                | 93.051          | 173.664       | 99.25              |

### Rac-4ah

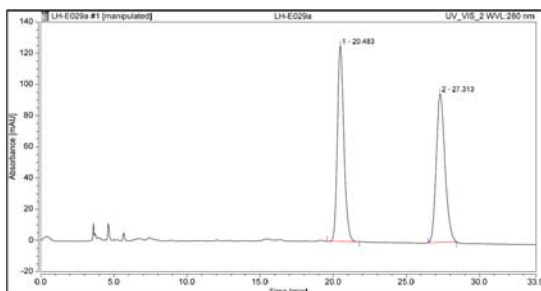

| No | Retention Time<br>min | Area<br>mAU*min | Height<br>mAU | Relative Area<br>% |
|----|-----------------------|-----------------|---------------|--------------------|
| 1  | 20.483                | 64.487          | 125.307       | 49.51              |
| 2  | 27.313                | 65.765          | 95.208        | 50.49              |

### Asy-4ah

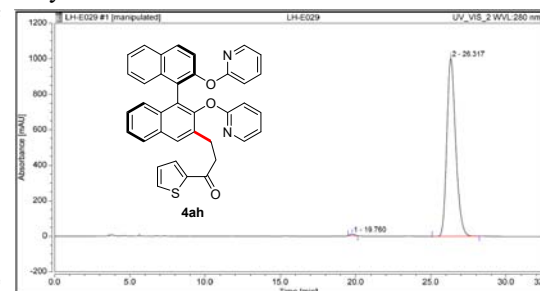

| No | Retention Time<br>min | Area<br>mAU*min | Height<br>mAU | Relative Area<br>% |
|----|-----------------------|-----------------|---------------|--------------------|
| 1  | 19.760                | 3.282           | 9.308         | 0.48               |
| 2  | 26.317                | 685.717         | 1002.002      | 99.52              |

### Rac-5

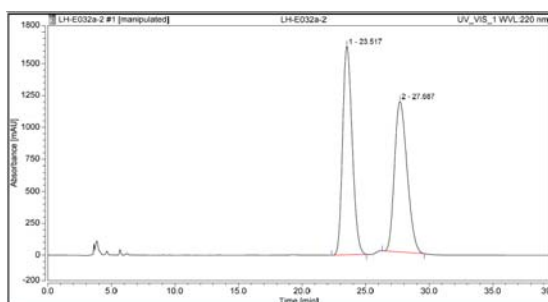

| No | Retention Time<br>min | Area<br>mAU*min | Height<br>mAU | Relative Area<br>% |
|----|-----------------------|-----------------|---------------|--------------------|
| 1  | 23.517                | 1427.325        | 1635.293      | 51.25              |
| 2  | 27.687                | 1357.620        | 1179.988      | 48.75              |

### Asy-5

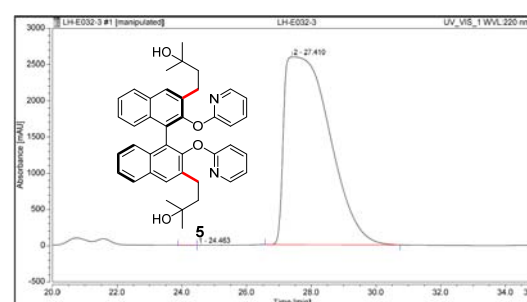

| No | Retention Time<br>min | Area<br>mAU*min | Height<br>mAU | Relative Area<br>% |
|----|-----------------------|-----------------|---------------|--------------------|
| 1  | 24.463                | 0.268           | 0.000         | 0.01               |
| 2  | 27.410                | 4237.542        | 2591.211      | 99.99              |

Rac-6

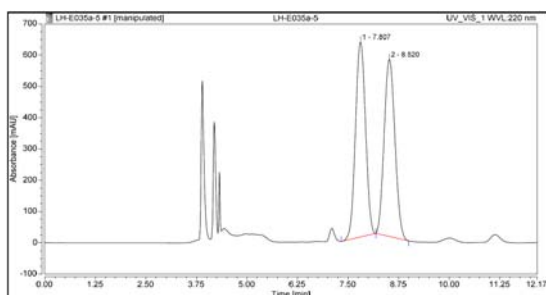

| No | Retention Time<br>min | Area<br>mAU*min | Height<br>mAU | Relative Area<br>% |
|----|-----------------------|-----------------|---------------|--------------------|
| 1  | 7.807                 | 179.176         | 624.294       | 50.57              |
| 2  | 8.520                 | 175.168         | 566.936       | 49.43              |

Asy-6

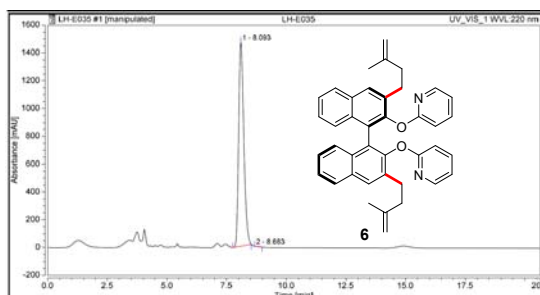

| No | Retention Time<br>min | Area<br>mAU*min | Height<br>mAU | Relative Area<br>% |
|----|-----------------------|-----------------|---------------|--------------------|
| 1  | 8.093                 | 366.919         | 1467.986      | 99.96              |
| 2  | 8.683                 | 0.160           | 0.000         | 0.04               |

Rac-7

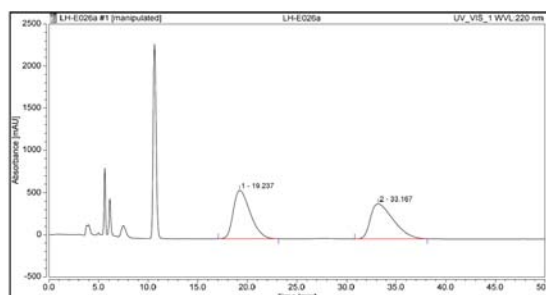

| No | Retention Time<br>min | Area<br>mAU*min | Height<br>mAU | Relative Area<br>% |
|----|-----------------------|-----------------|---------------|--------------------|
| 1  | 19.237                | 1138.845        | 575.271       | 50.51              |
| 2  | 33.167                | 1115.847        | 418.414       | 49.49              |

Asy-7

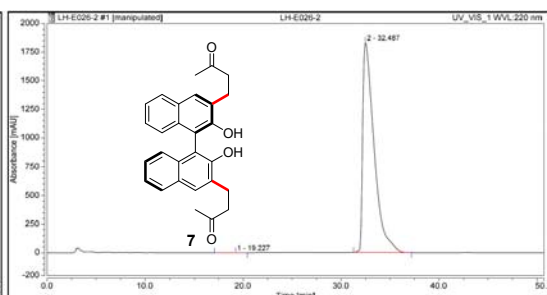

| No | Retention Time<br>min | Area<br>mAU*min | Height<br>mAU | Relative Area<br>% |
|----|-----------------------|-----------------|---------------|--------------------|
| 1  | 19.227                | 0.140           | 0.203         | 0.01               |
| 2  | 32.487                | 2465.672        | 1830.824      | 99.99              |
